# Supplementary material for: Functional heterogeneity of lymphocytic patterns in primary melanoma dissected through single-cell multiplexing
Source: eLife journal article supplement (doi:10.7554/elife.53008), 2020-02-14
Supplement: supp [file Cores.xlsx]

## Sheet: PresentCores
Patient	CoreNumber	type	Breslow	Ulc	Mitoses	Count_Lymphocytes
1	1	ssmm	0.22	0	0	222
1	3	ssmm	0.22	0	0	1098
2	5	ssmm	0.71	0	1=6	87
2	8	ssmm	0.71	0	1=6	138
3	9	ssmm	2.50	0	1=6	343
3	11	ssmm	2.50	0	1=6	140
4	13	ssmm	0.26	0	0	959
4	14	ssmm	0.26	0	0	316
5	15	ssmm	1.73	0	>6	413
5	16	ssmm	1.73	0	>6	497
6	19	ssmm	0.30	0	0	222
7	20	ssmm	0.51	0	0	353
7	21	ssmm	0.51	0	0	274
8	22	ssmm	0.31	0	1=6	74
9	23	ssmm	7.2	0	>6	871
10	24	ssmm	0.42	0	0	12
10	25	ssmm	0.42	0	0	787
12	27	lmm	0.42	0	0	109
12	28	lmm	0.42	0	0	123
14	32	ssmm	0.75	0	0	462
14	33	ssmm	0.75	0	0	476
14	34	ssmm	0.75	0	0	121
15	35	ssmm	0.35	0	0	128
16	36	ssmm	0.28	0	0	155
17	37	ssmm	0.36	0	0	67
17	39	ssmm	0.36	0	0	549
18	40	ssmm	0.93	+	0	904
19	42	lmm	0.37	0	1=6	291
20	43	ssmm	0.67	0	1=6	121
20	44	ssmm	0.67	0	1=6	595
20	45	ssmm	0.67	0	1=6	278
20	46	ssmm	0.67	0	1=6	908
20	47	ssmm	0.67	0	1=6	441
21	48	ssmm	0.5	0	0	347
21	49	ssmm	0.5	0	0	270
22	50	ssmm	1.13	+	1=6	962
23	51	ssmm	0.78	0	0	62
23	52	ssmm	0.78	0	0	52
23	53	ssmm	0.78	0	0	140
24	54	ssmm	1125	0	1=6	410
24	55	ssmm	1125	0	1=6	424
24	56	ssmm	1125	0	1=6	74
25	57	nmm	2.72	+	>6	155
25	58	nmm	2.72	+	>6	160
26	60	ssmm	0.66	0	1=6	171
26	61	ssmm	0.66	0	1=6	11
27	62	ssmm	0.78	0	0	290
28	64	ssmm	2.72	+	>6	351
28	65	ssmm	2.72	+	>6	126
29	66	ssmm	0.66	0	0	214
29	67	nmm	1.72	0	>6	358
30	68	nmm	1.72	0	>6	20
30	69	nmm	1.72	0	>6	9
30	70	nmm	1.72	0	>6	326
30	71	nmm	1.72	0	>6	384
27	74	ssmm	0.78	0	0	139
31	75	ssmm	0.7	0	0	1531
31	76	ssmm	0.7	0	0	282
31	77	ssmm	0.7	0	0	356
31	78	ssmm	0.7	0	0	357

## Sheet: core_activation_brisk_metadata
Patient	type	Breslow	Ulc	Mitoses	Activation	Brisk
1	ssmm	0.22	0	0	0.118759	BRISK
1	ssmm	0.22	0	0	0.111676	BRISK
4	ssmm	0.26	0	0	-0.00328685	NONBRISK
4	ssmm	0.26	0	0	-0.00666284	NONBRISK
16	ssmm	0.28	0	0	0.0365077	NONBRISK
6	ssmm	0.3	0	0	-0.214568	NONBRISK
8	ssmm	0.31	0	1=6	-0.130388	NONBRISK
15	ssmm	0.35	0	0	-0.225209	NONBRISK
17	ssmm	0.36	0	0	0.0674433	NONBRISK
17	ssmm	0.36	0	0	0.0345085	NONBRISK
19	lmm	0.37	0	1=6	-0.00621454	NONBRISK
10	ssmm	0.42	0	0	0.0313235	BRISK
10	ssmm	0.42	0	0	0.0446345	BRISK
12	lmm	0.42	0	0	0.2069	NONBRISK
12	lmm	0.42	0	0	0.257818	NONBRISK
21	ssmm	0.5	0	0	-0.133161	NONBRISK
21	ssmm	0.5	0	0	-0.324121	NONBRISK
7	ssmm	0.51	0	0	-0.0251688	NONBRISK
7	ssmm	0.51	0	0	-0.00874009	NONBRISK
26	ssmm	0.66	0	1=6	0.144993	NONBRISK
26	ssmm	0.66	0	1=6	0.0232086	NONBRISK
29	ssmm	0.66	0	0	0.0164048	NONBRISK
20	ssmm	0.67	0	1=6	-0.0593553	NONBRISK
20	ssmm	0.67	0	1=6	-0.0552164	NONBRISK
20	ssmm	0.67	0	1=6	-0.000567247	NONBRISK
20	ssmm	0.67	0	1=6	-0.0271277	NONBRISK
20	ssmm	0.67	0	1=6	-0.0248761	NONBRISK
31	ssmm	0.7	0	0	0.000548647	BRISK
31	ssmm	0.7	0	0	-0.0714287	BRISK
31	ssmm	0.7	0	0	-0.0700904	BRISK
31	ssmm	0.7	0	0	-0.0550746	BRISK
2	ssmm	0.71	0	1=6	0.0964146	NONBRISK
2	ssmm	0.71	0	1=6	0.135278	NONBRISK
14	ssmm	0.75	0	0	0.128914	NONBRISK
14	ssmm	0.75	0	0	0.0806753	NONBRISK
14	ssmm	0.75	0	0	0.103754	NONBRISK
23	ssmm	0.78	0	0	-0.00663769	NONBRISK
23	ssmm	0.78	0	0	-0.0174205	NONBRISK
23	ssmm	0.78	0	0	-0.00676692	NONBRISK
27	ssmm	0.78	0	0	0.0160511	BRISK
27	ssmm	0.78	0	0	-0.0635514	BRISK
18	ssmm	0.93	+	0	0.175507	BRISK
24	ssmm	1.125	0	1=6	-0.0270784	NONBRISK
24	ssmm	1.125	0	1=6	0.0335708	NONBRISK
24	ssmm	1.125	0	1=6	-0.0310783	NONBRISK
22	ssmm	1.13	+	1=6	-0.027882	BRISK
30	nmm	1.72	0	>6	0.0197779	NONBRISK
30	nmm	1.72	0	>6	-0.150391	NONBRISK
30	nmm	1.72	0	>6	-0.0810495	NONBRISK
30	nmm	1.72	0	>6	0.035994	NONBRISK
30	nmm	1.72	0	>6	0.0816123	NONBRISK
5	ssmm	1.73	0	>6	-0.0069769	NONBRISK
5	ssmm	1.73	0	>6	-7.16e-05	NONBRISK
3	ssmm	2.5	0	1=6	-0.0131501	NONBRISK
3	ssmm	2.5	0	1=6	0.0394398	NONBRISK
25	nmm	2.72	+	>6	0.0434729	NONBRISK
25	nmm	2.72	+	>6	-0.0298123	NONBRISK
28	ssmm	2.72	+	>6	-0.0927262	BRISK
28	ssmm	2.72	+	>6	0.0245822	BRISK
9	ssmm	7.2	0	>6	0.0271867	NONBRISK

## Sheet: BRISKvsNONBRISK
Patient	Core	type	Breslow	Ulc	Mitoses	STATUS	Count_Lymphocytes
1	3	ssmm	0.22	0	0	BRISK	1098
10	25	ssmm	0.42	0	0	BRISK	787
18	40	ssmm	0.93	(+)	0	BRISK	904
22	50	ssmm	1.13	+	1=6	BRISK	962
28	64	ssmm	2.72	+	>6	BRISK	351
31	75	ssmm	0.7	0	0	BRISK	1531
31	76	ssmm	0.7	0	0	BRISK	282
31	77	ssmm	0.7	0	0	BRISK	356
31	78	ssmm	0.7	0	0	BRISK	357
2	5	ssmm	0.71	0	1=6	NON BRISK IN NON BRISK	87
3	9	ssmm	2.5	0	1=6	NON BRISK IN NON BRISK	343
3	11	ssmm	2.5	0	1=6	NON BRISK IN NON BRISK	140
4	13	ssmm	0.26	0	0	NON BRISK IN NON BRISK	959
5	16	ssmm	1.73	0	>6	NON BRISK IN NON BRISK	497
8	22	ssmm	0.31	0	1=6	NON BRISK IN NON BRISK	74
14	34	ssmm	0.75	0	0	NON BRISK IN NON BRISK	121
15	35	ssmm	0.35	0	0	NON BRISK IN NON BRISK	128
16	36	ssmm	0.28	0	0	NON BRISK IN NON BRISK	155
17	37	ssmm	0.36	0	0	NON BRISK IN NON BRISK	67
19	42	lmm	0.37	0	1=6	NON BRISK IN NON BRISK	291
20	43	ssmm	0.67	0	1=6	NON BRISK IN NON BRISK	121
20	44	ssmm	0.67	0	1=6	NON BRISK IN NON BRISK	595
20	46	ssmm	0.67	0	1=6	NON BRISK IN NON BRISK	908
21	48	ssmm	0.5	0	0	NON BRISK IN NON BRISK	347
23	51	ssmm	0.78	0	0	NON BRISK IN NON BRISK	62
23	52	ssmm	0.78	0	0	NON BRISK IN NON BRISK	52
23	53	ssmm	0.78	0	0	NON BRISK IN NON BRISK	140
24	55	ssmm	1125	0	1=6	NON BRISK IN NON BRISK	424
24	56	ssmm	1125	0	1=6	NON BRISK IN NON BRISK	74
25	57	nmm	2.72	+	>6	NON BRISK IN NON BRISK	155
25	58	nmm	2.72	+	>6	NON BRISK IN NON BRISK	160
26	60	ssmm	0.66	0	1=6	BRISK IN NON BRISK	171
26	61	ssmm	0.66	0	1=6	BRISK IN NON BRISK	11
27	62	ssmm	0.78	0	0	BRISK IN NON BRISK	290
30	68	nmm	1.72	0	>6	BRISK IN NON BRISK	20
30	69	nmm	1.72	0	>6	BRISK IN NON BRISK	9
30	70	nmm	1.72	0	>6	BRISK IN NON BRISK	326
30	71	nmm	1.72	0	>6	BRISK IN NON BRISK	384
4	14	ssmm	0.26	0	0	BRISK IN NON BRISK	316
5	15	ssmm	1.73	0	>6	BRISK IN NON BRISK	413
7	20	ssmm	0.51	0	0	BRISK IN NON BRISK	353
7	21	ssmm	0.51	0	0	BRISK IN NON BRISK	274
9	23	ssmm	7.2	0	>6	BRISK IN NON BRISK	871
14	32	ssmm	0.75	0	0	BRISK IN NON BRISK	462
14	33	ssmm	0.75	0	0	BRISK IN NON BRISK	476
20	45	ssmm	0.67	0	1=6	BRISK IN NON BRISK	278
20	47	ssmm	0.67	0	1=6	BRISK IN NON BRISK	441
24	54	ssmm	1125	0	1=6	BRISK IN NON BRISK	410

## Sheet: EARLYvsLATE
Patient	CoreNumber	type	Breslow	Ulc	Mitoses	Status	Count_Lymphocytes
1	1	ssmm	0.22	0	0	LATE REGRESSION	222
2	8	ssmm	0.71	0	1=6	LATE REGRESSION	138
10	24	ssmm	0.42	0	0	LATE REGRESSION	12
12	27	lmm	0.42	0	0	LATE REGRESSION	109
28	65	ssmm	2.72	+	>6	LATE REGRESSION	126
1	3	ssmm	0.22	0	0	EARLY REGRESSION	1098
6	19	ssmm	0.30	0	0	EARLY REGRESSION	222
14	32	ssmm	0.75	0	0	EARLY REGRESSION	462
21	49	ssmm	0.5	0	0	EARLY REGRESSION	270
24	54	ssmm	1125	0	1=6	EARLY REGRESSION	410
29	66	ssmm	0.66	0	0	EARLY REGRESSION	214
29	67	nmm	1.72	0	>6	EARLY REGRESSION	358
31	75	ssmm	0.7	0	0	EARLY REGRESSION	1531

## Sheet: REGRESSIONvsNONREGRESSION
Patient	CoreNumber	type	Breslow	Ulc	Mitoses	Status	Count_Lymphocytes
1	1	ssmm	0.22	0	0	REGRESSION	222
2	8	ssmm	0.71	0	1=6	REGRESSION	138
10	24	ssmm	0.42	0	0	REGRESSION	12
12	27	lmm	0.42	0	0	REGRESSION	109
28	65	ssmm	2.72	+	>6	REGRESSION	126
1	3	ssmm	0.22	0	0	REGRESSION	1098
6	19	ssmm	0.30	0	0	REGRESSION	222
14	32	ssmm	0.75	0	0	REGRESSION	462
21	49	ssmm	0.5	0	0	REGRESSION	270
24	54	ssmm	1125	0	1=6	REGRESSION	410
29	66	ssmm	0.66	0	0	REGRESSION	214
29	67	nmm	1.72	0	>6	REGRESSION	358
31	75	ssmm	0.7	0	0	REGRESSION	1531
3	9	ssmm	2.50	0	1=6	NO REGRESSION	343
3	11	ssmm	2.50	0	1=6	NO REGRESSION	140
4	13	ssmm	0.26	0	0	NO REGRESSION	959
4	14	ssmm	0.26	0	0	NO REGRESSION	316
5	15	ssmm	1.73	0	>6	NO REGRESSION	413
5	16	ssmm	1.73	0	>6	NO REGRESSION	497
7	20	ssmm	0.51	0	0	NO REGRESSION	353
7	21	ssmm	0.51	0	0	NO REGRESSION	274
8	22	ssmm	0.31	0	1=6	NO REGRESSION	74
9	23	ssmm	7.2	0	>6	NO REGRESSION	871
15	35	ssmm	0.35	0	0	NO REGRESSION	128
16	36	ssmm	0.28	0	0	NO REGRESSION	155
17	37	ssmm	0.36	0	0	NO REGRESSION	67
17	39	ssmm	0.36	0	0	NO REGRESSION	549
18	40	ssmm	0.93	(+)	0	NO REGRESSION	904
19	42	lmm	0.37	0	1=6	NO REGRESSION	291
20	43	ssmm	0.67	0	1=6	NO REGRESSION	121
20	44	ssmm	0.67	0	1=6	NO REGRESSION	595
20	45	ssmm	0.67	0	1=6	NO REGRESSION	278
20	46	ssmm	0.67	0	1=6	NO REGRESSION	908
20	47	ssmm	0.67	0	1=6	NO REGRESSION	441
22	50	ssmm	1.13	+	1=6	NO REGRESSION	962
23	51	ssmm	0.78	0	0	NO REGRESSION	62
23	52	ssmm	0.78	0	0	NO REGRESSION	52
23	53	ssmm	0.78	0	0	NO REGRESSION	140
25	57	nmm	2.72	+	>6	NO REGRESSION	155
25	58	nmm	2.72	+	>6	NO REGRESSION	160
26	60	ssmm	0.66	0	1=6	NO REGRESSION	171
26	61	ssmm	0.66	0	1=6	NO REGRESSION	11
30	68	nmm	1.72	0	>6	NO REGRESSION	20
30	69	nmm	1.72	0	>6	NO REGRESSION	9
30	70	nmm	1.72	0	>6	NO REGRESSION	326
30	71	nmm	1.72	0	>6	NO REGRESSION	384
