# Supplementary material for: Functional heterogeneity of lymphocytic patterns in primary melanoma dissected through single-cell multiplexing
Source: eLife journal article supplement (doi:10.7554/elife.53008), 2020-02-14
Supplement: supp [file ImageMetaData.xlsx]

## Sheet: ExpressionData
CoreNumber	CellNumber	MeanTIM3	MeanCD69	MeanLAG3	MeanOX40	MeanPD1	MeanCD8	Location_Center_X	Location_Center_Y
11	1	0.1018347	0.0274968	0.0234377	0.0752895	0.0401445	0.2452586	1220093567	670751462
11	2	0.1306425	0.0166154	0.0127421	0.0298522	0.0269201	0.1967542	6712307692	6962615385
11	3	0.0896920	0.0245577	0.0206563	0.0641262	0.0287010	0.3328898	7903239075	9506838046
11	4	0.1125268	0.0237218	0.0228043	0.0929190	0.0329708	0.2089974	8695471698	9943849057
11	5	0.1338886	0.0277980	0.0235525	0.1152293	0.0354445	0.2373301	8251740413	9967669617
11	6	0.0919118	0.0239253	0.0204751	0.1157617	0.0299585	0.2433069	8603605769	1003644231
11	7	0.0364347	0.0100701	0.0074955	0.0114931	0.0177285	0.2525555	1140529086	1014911357
11	8	0.0323295	0.0115865	0.0062670	0.0075335	0.0157801	0.3444601	1040507177	103511244
11	9	0.1315579	0.0175652	0.0084637	0.0171342	0.0236328	0.3894419	1465643956	1050707692
11	10	0.0196078	0.0100165	0.0028979	0.0038586	0.0121112	0.2151666	8467871486	105988755
11	11	0.0268729	0.0269041	0.0094211	0.0134989	0.0158269	0.3124287	1026956175	1063282869
11	12	0.3048326	0.0205684	0.0159338	0.0288275	0.0274510	0.4229451	1199393939	1077527778
11	13	0.1194357	0.0253624	0.0219186	0.1045381	0.0340943	0.2301728	7922832861	1081167139
11	14	0.1391450	0.0251109	0.0167920	0.0700482	0.0246737	0.2520604	7804393443	1094311475
11	15	0.0795060	0.0156486	0.0112745	0.0140460	0.0206825	0.2154600	1172067308	1106850962
11	16	0.0798883	0.0137364	0.0148757	0.0172746	0.0184248	0.2855187	1242382682	1108332402
11	17	0.0416149	0.0075874	0.0069175	0.0148703	0.0154792	0.2632810	1025940994	1107888199
11	18	0.1010366	0.0207568	0.0202947	0.0888223	0.0375546	0.2611715	1523353503	1121197452
11	19	0.0629839	0.0178859	0.0072775	0.0187154	0.0172826	0.2609351	7121217949	1121810897
11	20	0.1191510	0.0279079	0.0267466	0.0224824	0.0218351	0.2946888	1139800971	1126956311
11	21	0.0949156	0.0293808	0.0099462	0.0230902	0.0231088	0.2707800	8308107256	1129731861
11	22	0.0635096	0.0153985	0.0099568	0.0257780	0.0237813	0.2197877	8512316514	1134316514
11	23	0.0637946	0.0226244	0.0062154	0.0087670	0.0178922	0.4363436	1193947115	1144666667
11	24	0.0414424	0.0241727	0.0042061	0.0076576	0.0161069	0.2801633	1221018927	1182817035
11	25	0.0685848	0.0172847	0.0063512	0.0128410	0.0183291	0.2770674	115061413	1211679348
11	26	0.1012276	0.0185286	0.0066485	0.0159005	0.0184709	0.4287774	9403088235	1213464286
11	27	0.0844037	0.0152725	0.0119266	0.0336931	0.0218744	0.2016550	7699816514	1225463303
11	28	0.0998166	0.0184094	0.0109168	0.0729852	0.0236925	0.2413028	7830706861	1243656965
11	29	0.1791900	0.0239029	0.0098389	0.0249300	0.0246265	0.2565710	1266517857	1261571429
11	30	0.0575454	0.0276398	0.0057662	0.0225272	0.0178794	0.4096151	955.6	1263507407
11	31	0.2100199	0.0185942	0.0080758	0.0118810	0.0208873	0.3252077	1292813559	1262266949
11	32	0.1388917	0.0209548	0.0082012	0.0174936	0.0208525	0.3084058	130363913	1273508696
11	33	0.0366478	0.0191752	0.0068104	0.0130765	0.0156723	0.2617403	1114078292	1282946619
11	34	0.0506135	0.0337805	0.0078087	0.0126132	0.0173375	0.2778007	1170921053	1290877193
11	35	0.1477058	0.0241863	0.0075445	0.0170101	0.0270230	0.4569921	1599411168	1299548223
11	36	0.0723481	0.0270630	0.0160188	0.0141343	0.0191367	0.3711910	8842968198	1314946996
11	37	0.0934247	0.0238601	0.0061737	0.0097173	0.0186786	0.3047957	1243604418	1341771084
11	38	0.0360089	0.0119772	0.0060079	0.0108761	0.0158601	0.1798706	1074438424	1353118227
11	39	0.0841021	0.0154747	0.0045281	0.0057413	0.0144167	0.2887431	8348848921	1356147482
11	40	0.0939514	0.0156472	0.0078236	0.0139162	0.0177889	0.3860936	1017087282	1364750623
11	41	0.1052611	0.0217434	0.0083634	0.0104523	0.0208969	0.2619841	1240106931	1368455446
11	42	0.0609448	0.0223013	0.0174307	0.0268509	0.0225246	0.3397251	1508234875	137413879
11	43	0.0545253	0.0119420	0.0083306	0.0097485	0.0175917	0.1926886	1393423729	1408316384
11	44	0.0709523	0.0271862	0.0079755	0.0151899	0.0154546	0.2183834	9652869198	1412126582
11	45	0.2150943	0.0452830	0.0107140	0.0079319	0.0240474	0.2804884	1184781132	1421769811
11	46	0.0790107	0.0143939	0.0048277	0.0033720	0.0176471	0.2168449	1059193182	1422424242
11	47	0.1377803	0.0204665	0.0068179	0.0145329	0.0192618	0.2734974	9917418301	1425715686
11	48	0.0575825	0.0093323	0.0082237	0.0144453	0.0139820	0.2733019	562092827	1437447257
11	49	0.0464352	0.0244913	0.0041858	0.0052534	0.0129380	0.3122562	8646684636	1442579515
11	50	0.1572567	0.0178172	0.0097054	0.0093652	0.0187304	0.1888083	1274534247	14463379
11	51	0.0597519	0.0203922	0.0069308	0.0105002	0.0179592	0.2845938	1651734694	1454571429
11	52	0.1346334	0.0272165	0.0028133	0.0108483	0.0157502	0.2221654	1034027174	1466646739
11	53	0.1198752	0.0366036	0.0067119	0.0117716	0.0226861	0.3270808	1093872378	1483744755
11	54	0.0695401	0.0128246	0.0075016	0.0135430	0.0147913	0.2469882	1252285285	1506555556
11	55	0.1625971	0.0173788	0.0256197	0.0177950	0.0267943	0.3840733	1904410377	1505929245
11	56	0.0975082	0.0255855	0.0080882	0.0149374	0.0183415	0.2819308	1113715278	1511076389
11	57	0.0492935	0.0163206	0.0124423	0.0159170	0.0178345	0.2559544	1444227941	1511602941
11	58	0.0912085	0.0193900	0.0058567	0.0148789	0.0219531	0.2397924	1925699346	151680719
11	59	0.1223384	0.0107480	0.0046478	0.0084967	0.0178214	0.2077124	127772963	1519292593
11	60	0.2044914	0.0103067	0.0071225	0.0062846	0.0214346	0.2233618	131617094	1526628205
11	61	0.1284055	0.0245653	0.0075620	0.0174177	0.0220200	0.3276064	111890566	1536143396
11	62	0.0963627	0.0124062	0.0023471	0.0096946	0.0164735	0.3102121	9444460967	1538710037
11	63	0.1558390	0.0219151	0.0075754	0.0143082	0.0183243	0.2887314	129634739	1540447791
11	64	0.0807407	0.0181264	0.0119680	0.0051997	0.0218882	0.2842847	1430118519	1550.1
11	65	0.1222312	0.0191423	0.0048169	0.0063032	0.0204136	0.3079416	1127666667	1551972603
11	66	0.1326163	0.0165057	0.0096283	0.0229148	0.0180129	0.2038630	1407126866	1558940299
11	67	0.1295449	0.0145329	0.0202910	0.0116937	0.0198474	0.2795404	1357167421	1574468326
11	68	0.2865428	0.0173787	0.0027864	0.0095150	0.0236739	0.2405160	1100673684	1577968421
11	69	0.1694968	0.0191543	0.0103473	0.0211954	0.0263170	0.3292606	1027843373	1582901205
11	70	0.0619608	0.0211590	0.0062571	0.0104837	0.0178475	0.3538824	1690931111	1602557778
11	71	0.1947712	0.0084100	0.0252415	0.0022905	0.0244549	0.2653363	133960767	1602477876
11	72	0.0906822	0.0221865	0.0191465	0.0102982	0.0247240	0.2689817	1398415966	160589916
11	73	0.0579555	0.0211734	0.0275285	0.0082771	0.0329691	0.3535767	1433158103	1603786561
11	74	0.0399556	0.0040907	0.0427356	0.0026954	0.0276412	0.3231859	1385401617	1623981132
11	75	0.0773194	0.0151998	0.0410921	0.0092132	0.0312038	0.2671631	1408508861	1628443038
11	76	0.3248993	0.0286328	0.0071851	0.0244964	0.0351330	0.4021891	1255955479	1633407534
11	77	0.1152021	0.0139676	0.0037279	0.0035706	0.0188332	0.3238078	1785391975	1661854938
11	78	0.1027916	0.0151213	0.0039050	0.0051678	0.0176138	0.2101861	1249966102	1679461864
11	79	0.2820452	0.0319951	0.0112137	0.0182840	0.0290611	0.4560470	1472131387	1685972628
11	80	0.0637860	0.0191116	0.0100218	0.0097313	0.0190511	0.2284193	1509697531	1707280864
11	81	0.1975763	0.0274147	0.0046478	0.0084786	0.0214506	0.2255810	1475148148	1710662037
11	82	0.0538174	0.0249946	0.0074625	0.0112260	0.0177907	0.4348273	1692512821	171167033
11	83	0.1696302	0.0219357	0.0159907	0.0133226	0.0219357	0.2288656	1759821918	1722858447
11	84	0.1145911	0.0245262	0.0206768	0.0464030	0.0364221	0.3622139	2059222408	1725230769
11	85	0.0886160	0.0215115	0.0063963	0.0252618	0.0169427	0.2295450	1692553398	174192233
11	86	0.2254126	0.0262300	0.0149102	0.0315795	0.0241192	0.2755342	1763002639	174748285
11	87	0.0694936	0.0079033	0.0060748	0.0085168	0.0142788	0.3043787	1825892638	1765248466
11	88	0.0886120	0.0210277	0.0117164	0.0169709	0.0192118	0.4409447	1588165025	1796004926
11	89	0.0865929	0.0302665	0.0180828	0.0074409	0.0244679	0.3265125	1458764957	1798367521
11	90	0.2173397	0.0357393	0.0168098	0.0307154	0.0260025	0.4641795	1765965766	1804254054
11	91	0.1113210	0.0286103	0.0109346	0.0192643	0.0215829	0.3779376	1791494526	1809781022
11	92	0.0663454	0.0349728	0.0188708	0.0117647	0.0291330	0.2693031	233566747	1828163855
11	93	0.0305156	0.0150617	0.0063471	0.0071895	0.0124038	0.2142048	1830177778	1823551852
11	94	0.1457516	0.0218382	0.0092239	0.0181536	0.0194036	0.3874020	1764308333	1828508333
11	95	0.0798257	0.0408987	0.0087418	0.0087255	0.0204466	0.3822440	1725981944	1837422222
11	96	0.1022699	0.0226311	0.0095238	0.0161113	0.0219550	0.4649570	1693014778	1848334975
11	97	0.0714536	0.0138268	0.0045291	0.0103102	0.0135874	0.2110651	1838422535	1858610329
11	98	0.0801427	0.0256168	0.0097310	0.0141284	0.0184720	0.2782318	1743765166	1867330724
11	99	0.0398986	0.0215324	0.0067050	0.0123648	0.0147343	0.3605877	1884569921	1875654354
11	100	0.0232086	0.0125134	0.0064349	0.0046168	0.0134403	0.2242068	1994359091	1872445455
11	101	0.0684418	0.0112122	0.0102160	0.0148168	0.0169270	0.3800842	1638919169	1879300231
11	102	0.0929994	0.0255974	0.0515472	0.2751072	0.0651042	0.3136949	215240625	1880273438
11	103	0.0804568	0.0240789	0.0232816	0.0261797	0.0261689	0.2948395	1594755495	1887637363
11	104	0.0228277	0.0122394	0.0040867	0.0047884	0.0131889	0.2152941	1767589474	1888847368
11	105	0.0454390	0.0192668	0.0117221	0.0060102	0.0189258	0.2657502	1997163043	1893717391
11	106	0.0236373	0.0142831	0.0055885	0.0067038	0.0141272	0.2996462	2046116208	1942489297
11	107	0.0460131	0.0140131	0.0076131	0.0121516	0.0158641	0.3622797	1963533333	1956728
11	108	0.0316664	0.0144544	0.0088490	0.0089394	0.0183760	0.3244392	2023337176	1964694524
11	109	0.1323561	0.0214481	0.0171584	0.0165366	0.0256488	0.3259725	1532776699	196805178
11	110	0.0593768	0.0200797	0.0170531	0.0173298	0.0242942	0.2005533	1978875519	1987136929
11	111	0.0632334	0.0199630	0.0138735	0.0276952	0.0198224	0.2510396	1927332075	1999.8
11	112	0.0669327	0.0120155	0.0090971	0.0137179	0.0163019	0.4029260	1630040698	2002724806
11	113	0.1971219	0.0135488	0.0230582	0.0311538	0.0234116	0.3186401	1663450644	201206867
11	114	0.1608225	0.0216705	0.0202190	0.0569773	0.0316145	0.2755157	1727668831	2018282468
11	115	0.0850765	0.0180822	0.0164337	0.0607587	0.0279220	0.2214714	1894968668	2017788512
11	116	0.0822284	0.0122627	0.0151468	0.0293806	0.0213508	0.2258118	1645497354	2020904762
11	117	0.0621027	0.0219501	0.0077762	0.0388142	0.0155123	0.3027237	1623276451	2029262799
11	118	0.0931785	0.0221334	0.0209912	0.0607907	0.0333270	0.2057872	1746822006	202838835
11	119	0.1389726	0.0211473	0.0299789	0.0991411	0.0357965	0.2519203	1818491736	2037466942
11	120	0.0705527	0.0204964	0.0133760	0.0713702	0.0289082	0.3473846	227344713	2045244713
11	121	0.0846154	0.0184578	0.0193439	0.0276584	0.0290913	0.2481146	1810668269	2053225962
11	122	0.0911787	0.0426186	0.0219098	0.0219462	0.0397707	0.2282790	1973795824	2064962877
11	123	0.0929121	0.0252061	0.0318160	0.2011086	0.0515763	0.3344558	2114766784	208834629
11	124	0.0914323	0.0296533	0.0158746	0.0273609	0.0315936	0.2639404	2227496868	2107281837
11	125	0.1166624	0.0333928	0.0070792	0.0336644	0.0202699	0.3536881	1684597403	2118835498
11	126	0.1032091	0.0218145	0.0172877	0.0321039	0.0374882	0.2896287	2272890675	2120205788
11	127	0.1029550	0.0121624	0.0105827	0.0429716	0.0199724	0.2552555	1655521127	2119064789
11	128	0.1440789	0.0221353	0.0180588	0.0354246	0.0217765	0.2969223	1744553015	2123804574
11	129	0.1360115	0.0305390	0.0172713	0.0316322	0.0396393	0.2151807	2258878049	2131780488
11	130	0.1083360	0.0201950	0.0111565	0.0280032	0.0261368	0.2627451	189430303	2140283422
11	131	0.0248366	0.0119929	0.0054777	0.0090673	0.0125324	0.2973338	1717	2181031746
11	132	0.0839485	0.0287774	0.0118032	0.0444060	0.0251442	0.1828720	2146112745	2194019608
11	133	0.1113008	0.0359869	0.0147461	0.0215872	0.0299004	0.2768232	2226817035	2217791798
11	134	0.0773750	0.0093915	0.0115766	0.0289993	0.0251935	0.2661891	2236110701	2243870849
11	135	0.0466112	0.0087206	0.0064822	0.0140210	0.0149700	0.1830961	1808086758	2259292237
11	136	0.0687615	0.0205107	0.0066370	0.0118282	0.0188602	0.2969178	1828996403	2259106115
11	137	0.1475185	0.0323268	0.0146273	0.0271717	0.0176180	0.2896143	6999495549	2415801187
11	138	0.0849354	0.0430033	0.0105787	0.0334577	0.0153037	0.2669154	7177365854	2426619512
11	139	0.0447447	0.0122063	0.0046458	0.0081964	0.0113937	0.1919272	9436711712	2581342342
11	140	0.0745957	0.0118363	0.0007156	0.0077573	0.0122799	0.2453986	8699343066	2585532847
13	1	0.1195422	0.0048222	0.0033774	0.0119899	0.0136598	0.5339338	1767028708	6439138756
13	2	0.1513413	0.0223003	0.0160570	0.0157643	0.0347088	0.4462979	1774935323	6600248756
13	3	0.1147925	0.0085776	0.0046006	0.0036167	0.0184993	0.5297166	1791925795	6706961131
13	4	0.1656863	0.0157007	0.0020761	0.0090830	0.0122982	0.5406286	1493761029	6961433824
13	5	0.2348388	0.0169072	0.0032180	0.0108438	0.0310414	0.4311967	1533401055	702944591
13	6	0.1876452	0.0085665	0.0027984	0.0019989	0.0152865	0.4403769	2128179612	7030194175
13	7	0.1962738	0.0178913	0.0025679	0.0071733	0.0202359	0.5109204	1519330961	7079857651
13	8	0.2650771	0.0084618	0.0034932	0.0060537	0.0212831	0.6362269	1511621359	7316359223
13	9	0.3487413	0.0113472	0.0096648	0.0096395	0.0256293	0.5660974	1503251613	7441451613
13	10	0.1005020	0.0094588	0.0019765	0.0108078	0.0149333	0.4366431	2219104	770048
13	11	0.1180124	0.0072092	0.0082407	0.0090357	0.0165351	0.5499221	1049482192	9638575342
13	12	0.0845577	0.0137165	0.0057830	0.0083853	0.0115840	0.4713653	2744064516	9754423963
13	13	0.1009468	0.0153655	0.0037767	0.0141549	0.0143515	0.5814372	8417915567	1189746702
13	14	0.2337084	0.0118073	0.0043478	0.0154476	0.0170503	0.5108525	8162043478	1209408696
13	15	0.1610498	0.0086275	0.0078311	0.0114148	0.0171584	0.4527783	8506584615	1279209231
13	16	0.1005387	0.0213101	0.0092868	0.0240681	0.0148675	0.3774618	8144065934	1328428571
13	17	0.1805547	0.0106675	0.0015239	0.0060551	0.0185106	0.5888449	8069689119	1442243523
13	18	0.1621259	0.0224974	0.0057104	0.0143447	0.0220846	0.6483660	8221008772	1448473684
13	19	0.0980893	0.0234293	0.0057906	0.0182061	0.0126658	0.3509887	1496395745	1519046809
13	20	0.1775910	0.0148599	0.0031092	0.0081232	0.0168207	0.5404762	1473582143	1541.85
13	21	0.2612689	0.0157310	0.0102140	0.0117498	0.0200552	0.5434429	1480790875	1568072243
13	22	0.1367440	0.0132146	0.0031069	0.0053576	0.0274096	0.5422121	1575235915	1593580986
13	23	0.1443137	0.0176827	0.0078966	0.0190196	0.0183779	0.5377897	1394672727	1596254545
13	24	0.1607348	0.0217271	0.0061299	0.0098336	0.0214993	0.6109626	1647429293	1609371212
13	25	0.1363644	0.0088364	0.0059594	0.0134772	0.0157719	0.4703999	1476021834	1626475983
13	26	0.1087287	0.0089817	0.0084546	0.0084756	0.0122285	0.4643896	1472709677	1639580645
13	27	0.0679806	0.0080655	0.0013948	0.0063877	0.0109359	0.4363251	1362963918	1642757732
13	28	0.1178896	0.0214878	0.0057004	0.0132201	0.0172226	0.3579139	1412793814	1651860825
13	29	0.0950567	0.0158602	0.0069997	0.0100083	0.0146689	0.4597192	144243459	1661527716
13	30	0.1793893	0.0125619	0.0041273	0.0046416	0.0167406	0.5740277	1697009836	1665803279
13	31	0.1429617	0.0245635	0.0063408	0.0133060	0.0167496	0.4558482	1369689055	1677559701
13	32	0.1592157	0.0169866	0.0082766	0.0131785	0.0174097	0.6127761	1611960526	1688628947
13	33	0.0876476	0.0215530	0.0044833	0.0114006	0.0154574	0.5862173	1353527851	1695469496
13	34	0.1470537	0.0215841	0.0107766	0.0289846	0.0205754	0.5138593	1717866142	1700244094
13	35	0.1072130	0.0307107	0.0053226	0.0127433	0.0171225	0.5993875	1369149013	1711378815
13	36	0.1394759	0.0160917	0.0070443	0.0125575	0.0150750	0.6147967	1556740741	1708007716
13	37	0.0755285	0.0238900	0.0054451	0.0103674	0.0136489	0.4805139	1425	1723625287
13	38	0.2903659	0.0200832	0.0070792	0.0126475	0.0192853	0.5546049	1597658009	1726212121
13	39	0.1203643	0.0199089	0.0066755	0.0093780	0.0188074	0.6049644	1301170412	1724048689
13	40	0.1531233	0.0241294	0.0080360	0.0097182	0.0153327	0.6265402	1319087432	1728882514
13	41	0.1055145	0.0155058	0.0041923	0.0101336	0.0157973	0.5562867	1368490265	1740638938
13	42	0.2308259	0.0105882	0.0086037	0.0142484	0.0170766	0.5013785	1574284848	173190303
13	43	0.1335706	0.0143749	0.0082803	0.0143624	0.0197202	0.6043212	1232133758	1738942675
13	44	0.1200028	0.0198711	0.0090626	0.0168503	0.0197326	0.5504608	1464701413	1739272085
13	45	0.2774279	0.0096540	0.0070473	0.0145098	0.0185813	0.5623183	1491032353	1744476471
13	46	0.1054894	0.0086960	0.0064802	0.0114721	0.0157532	0.5682596	1656289979	1745076759
13	47	0.1243642	0.0171229	0.0085938	0.0115317	0.0192325	0.5467806	1693092409	1754755776
13	48	0.1116563	0.0106920	0.0070283	0.0118761	0.0156042	0.5183622	1512856502	1762100149
13	49	0.2122518	0.0144998	0.0098789	0.0115774	0.0178094	0.6846509	1480022293	1759929936
13	50	0.1199387	0.0221078	0.0131373	0.0190809	0.0179167	0.5831250	1464340625	1766375
13	51	0.1101632	0.0164496	0.0093549	0.0113606	0.0164197	0.5192935	1564080153	177719084
13	52	0.1067474	0.0254210	0.0094925	0.0124106	0.0141984	0.4741407	1293967647	1776773529
13	53	0.1600818	0.0225018	0.0081262	0.0094684	0.0199224	0.4951243	1234524064	1785887701
13	54	0.0745791	0.0246894	0.0068736	0.0096611	0.0169502	0.5970567	1354781457	1786695364
13	55	0.1211167	0.0196743	0.0080891	0.0147624	0.0168960	0.5415288	1443133898	1791647458
13	56	0.2486203	0.0086508	0.0058509	0.0060125	0.0152376	0.5732400	1103498856	1787844394
13	57	0.2078525	0.0310067	0.0101698	0.0210245	0.0211652	0.5781218	1596511962	1790562201
13	58	0.1586200	0.0212488	0.0097555	0.0212682	0.0205123	0.5934684	1539436573	17915486
13	59	0.1344662	0.0201695	0.0097313	0.0130622	0.0188332	0.5440910	1570167901	1792106173
13	60	0.1030729	0.0167566	0.0066558	0.0129102	0.0147665	0.5485514	1419507463	1797221748
13	61	0.0786076	0.0090769	0.0078799	0.0116252	0.0151208	0.5710876	2524752809	1796653558
13	62	0.1049129	0.0105120	0.0067865	0.0077451	0.0132135	0.5410131	1186.15	1804113889
13	63	0.1575461	0.0239750	0.0072193	0.0108437	0.0198455	0.4450535	1478844697	1808.5
13	64	0.0981490	0.0146039	0.0100863	0.0094588	0.0171922	0.5319373	1290708	1811956
13	65	0.1560440	0.0221827	0.0083279	0.0149752	0.0174639	0.6625943	1351585165	1808711538
13	66	0.2111142	0.0143760	0.0144596	0.0140043	0.0223399	0.5594833	1609341232	181292654
13	67	0.1016132	0.0232977	0.0100326	0.0209130	0.0166621	0.5928277	144422084	181803577
13	68	0.1085958	0.0148148	0.0065558	0.0122599	0.0166568	0.6144385	1310916667	1820414141
13	69	0.3876399	0.0157251	0.0088268	0.0392027	0.0250307	0.5019349	1341930693	1816676568
13	70	0.0863789	0.0144912	0.0073906	0.0123100	0.0223924	0.5234946	1275230769	1822642012
13	71	0.1205288	0.0195127	0.0078771	0.0146940	0.0188398	0.6291569	1477171577	1823415945
13	72	0.1241067	0.0176172	0.0071962	0.0127003	0.0171594	0.5460237	1649170051	1823647208
13	73	0.1505696	0.0047686	0.0055393	0.0083429	0.0200652	0.5244653	2518857451	1826665227
13	74	0.1109095	0.0139665	0.0101110	0.0118781	0.0180109	0.5069124	1721281928	1828472289
13	75	0.1980467	0.0122269	0.0073362	0.0101096	0.0159248	0.5594871	1323878327	1835125475
13	76	0.2153182	0.0226054	0.0085719	0.0183608	0.0246939	0.5470663	1547819923	1826438697
13	77	0.1445807	0.0083438	0.0086775	0.0127660	0.0181894	0.4414018	1680008511	1833923404
13	78	0.0704194	0.0051037	0.0109391	0.0114270	0.0203959	0.4342809	1179684211	1838258373
13	79	0.1424810	0.0218083	0.0085662	0.0160478	0.0166451	0.6172188	1448274549	1841557114
13	80	0.1104745	0.0402926	0.0084730	0.0194047	0.0210505	0.4465102	1478404145	1841248705
13	81	0.0927892	0.0186370	0.0073961	0.0110621	0.0182410	0.5754870	1428785016	1847563518
13	82	0.0995630	0.0186331	0.0105658	0.0182297	0.0178263	0.6940952	1494468571	1843942857
13	83	0.1366704	0.0168341	0.0131250	0.0181731	0.0352304	0.6354323	1730444444	184599458
13	84	0.0763296	0.0322184	0.0080738	0.0213123	0.0204665	0.5373831	1404941176	1854218954
13	85	0.1382353	0.0131519	0.0078953	0.0100021	0.0151439	0.5473509	1276611702	1855531915
13	86	0.2005656	0.0115950	0.0054110	0.0141308	0.0202206	0.5511784	1613314904	1856992788
13	87	0.1149080	0.0165430	0.0078190	0.0115958	0.0173635	0.5122534	1347064615	1851135385
13	88	0.1073415	0.0142453	0.0113452	0.0146648	0.0149020	0.4994072	1492632558	1859581395
13	89	0.1374814	0.0328874	0.0049834	0.0140016	0.0186451	0.3613365	1659935018	1864249097
13	90	0.0761689	0.0286878	0.0117496	0.0301056	0.0180543	0.5238462	1388888462	1863969231
13	91	0.1196629	0.0170082	0.0072373	0.0144195	0.0155651	0.6157414	1511140449	1865227528
13	92	0.1358190	0.0246484	0.0114676	0.0467815	0.0250050	0.5945930	1549828283	1868659091
13	93	0.2694013	0.0184058	0.0108331	0.0188566	0.0198482	0.5591917	1572701149	1867413793
13	94	0.1483951	0.0110094	0.0169644	0.0177342	0.0198693	0.5570516	1684988889	1872544444
13	95	0.1007240	0.0169417	0.0087443	0.0129207	0.0169727	0.6375377	1527256735	1876757528
13	96	0.1031574	0.0345400	0.0103268	0.0235998	0.0179487	0.5449673	1421333333	1869105128
13	97	0.0715850	0.0209886	0.0111765	0.0316013	0.0156454	0.6317484	1404279167	1875891667
13	98	0.0791333	0.0174105	0.0105287	0.0163424	0.0168612	0.6146334	1375922179	1874214008
13	99	0.0982005	0.0244546	0.0103387	0.0118411	0.0191834	0.6669553	1626991342	1874337662
13	100	0.1893791	0.0087092	0.0024510	0.0067320	0.0153431	0.4945915	12243125	1877308333
13	101	0.0787748	0.0194361	0.0091274	0.0156794	0.0172178	0.6553759	1461628722	1883292469
13	102	0.0909885	0.0121711	0.0077619	0.0140269	0.0169731	0.5094246	170873057	1888001727
13	103	0.1319270	0.0243498	0.0050935	0.0119180	0.0194185	0.6053640	1608549425	1878089655
13	104	0.1280154	0.0178042	0.0023390	0.0091930	0.0173852	0.5162856	1752652819	1881783383
13	105	0.0673826	0.0214303	0.0060858	0.0138801	0.0141079	0.4911236	1495352697	1882580913
13	106	0.1871913	0.0268085	0.0095162	0.0148431	0.0210400	0.5682527	1566307167	1886419795
13	107	0.0535322	0.0229992	0.0105717	0.0117647	0.0167578	0.5680088	137683662	1888794366
13	108	0.0657454	0.0199191	0.0077062	0.0086275	0.0184251	0.5396950	1252555556	1891901587
13	109	0.0542828	0.0192157	0.0079051	0.0072859	0.0201858	0.4693292	2496315789	1889457895
13	110	0.1274197	0.0278976	0.0142391	0.0117290	0.0175801	0.5764527	1673289294	1892421412
13	111	0.1704631	0.0168425	0.0072829	0.0080219	0.0199774	0.6604208	1233477204	1894963526
13	112	0.1054132	0.0087453	0.0067846	0.0092506	0.0134248	0.5258270	1269349693	1900432515
13	113	0.0802223	0.0221702	0.0085319	0.0141250	0.0160261	0.5181522	1385557377	190298829
13	114	0.0484076	0.0133633	0.0061446	0.0147496	0.0116773	0.4953291	1527780255	1898742038
13	115	0.0784849	0.0161319	0.0053654	0.0126560	0.0201961	0.4097148	1632754545	1903127273
13	116	0.0610401	0.0159486	0.0017181	0.0056528	0.0139681	0.4551643	1404705686	1903454849
13	117	0.1282780	0.0186838	0.0087750	0.0162687	0.0171928	0.6553679	1558231683	1906085149
13	118	0.0870397	0.0210828	0.0074404	0.0210124	0.0164666	0.5102570	1478019255	1906985879
13	119	0.0663026	0.0137203	0.0120248	0.0103396	0.0153950	0.4764238	1360639257	1919538462
13	120	0.1364674	0.0167100	0.0092448	0.0323700	0.0204688	0.5670893	1598376171	192492905
13	121	0.0639272	0.0138711	0.0061345	0.0120280	0.0145994	0.5270476	1456747143	1914691429
13	122	0.1066276	0.0323953	0.0096472	0.0190630	0.0176548	0.6469766	1507145478	1927344692
13	123	0.0854342	0.0158933	0.0087322	0.0183413	0.0214590	0.5240896	1653984472	1927270186
13	124	0.1248686	0.0260948	0.0126349	0.0133469	0.0166582	0.4652992	1325181556	1933818444
13	125	0.0976879	0.0248555	0.0042843	0.0155049	0.0154709	0.6189165	1550982659	1927456647
13	126	0.1768989	0.0215591	0.0101847	0.0156863	0.0204931	0.4821911	2427407767	1934555825
13	127	0.1095838	0.0101135	0.0040867	0.0095631	0.0189749	0.4845821	2446845614	1934691228
13	128	0.0756364	0.0193045	0.0072907	0.0072582	0.0185570	0.5507529	1139569061	1934270718
13	129	0.1030578	0.0186117	0.0110838	0.0115756	0.0197592	0.5421222	1711855305	1938942122
13	130	0.0758473	0.0155694	0.0107778	0.0403324	0.0167251	0.4556941	1310668874	1945953642
13	131	0.1160442	0.0230470	0.0106806	0.0286544	0.0178753	0.6294792	1573683862	1945765873
13	132	0.1774036	0.0151760	0.0062104	0.0138786	0.0286610	0.5028792	2690144981	1945628253
13	133	0.1181158	0.0218459	0.0075262	0.0139632	0.0177857	0.6186440	145847138	1945092593
13	134	0.1175590	0.0243215	0.0042052	0.0115300	0.0198817	0.5857122	2433890274	1949970075
13	135	0.0786835	0.0177218	0.0094865	0.0124370	0.0157983	0.6334921	1548052381	1958385714
13	136	0.0909444	0.0103790	0.0045036	0.0123883	0.0198434	0.4619275	1798512367	1951293286
13	137	0.0791095	0.0120924	0.0053568	0.0167034	0.0148161	0.5708425	1387723343	1953567723
13	138	0.1840822	0.0245154	0.0076639	0.0342857	0.0203996	0.6839066	1503502857	1953337143
13	139	0.3614363	0.0323175	0.0039877	0.0279235	0.0346704	0.5429341	1631927711	1961016867
13	140	0.1382372	0.0241157	0.0085208	0.0197906	0.0244584	0.6992195	1532095146	1967827184
13	141	0.1631710	0.0252152	0.0055629	0.0234407	0.0198829	0.6982699	1603561086	1958366516
13	142	0.0915530	0.0190412	0.0080072	0.0117200	0.0161336	0.5291583	128278327	1964273764
13	143	0.2938695	0.0231075	0.0054356	0.0151154	0.0203897	0.4592951	1448329114	1962382911
13	144	0.1534285	0.0264300	0.0034111	0.0127509	0.0167885	0.5383223	1157961538	1964884615
13	145	0.1596001	0.0251255	0.0087012	0.0240872	0.0191187	0.6228515	159009628	1967512035
13	146	0.0867789	0.0169880	0.0038728	0.0126759	0.0160768	0.5413229	130133195	1979211618
13	147	0.4489520	0.0302907	0.0108181	0.0317782	0.0337390	0.5105928	1634988506	1977793103
13	148	0.0845509	0.0227071	0.0064516	0.0175522	0.0166983	0.3435800	1440862903	1987754032
13	149	0.1435888	0.0316563	0.0122033	0.0155702	0.0240196	0.4323530	2692605263	1981894737
13	150	0.0833689	0.0118053	0.0053033	0.0106065	0.0201158	0.4794473	179384456	1983238342
13	151	0.0841826	0.0260418	0.0056420	0.0146922	0.0172538	0.6333770	1422448468	1990221448
13	152	0.0993982	0.0330810	0.0085420	0.0494370	0.0171520	0.5285964	1474972772	198500495
13	153	0.0813348	0.0225427	0.0059263	0.0181435	0.0170814	0.7276081	1555860577	1986410256
13	154	0.0989218	0.0241622	0.0074102	0.0140127	0.0194330	0.5046751	1280303609	1995791932
13	155	0.0923864	0.0218706	0.0044933	0.0243105	0.0168458	0.5776463	1355032854	1989965092
13	156	0.4413488	0.0631553	0.0116827	0.0378866	0.0272213	0.6403479	1631514644	1998853556
13	157	0.1268088	0.0414322	0.0073771	0.0223586	0.0203240	0.6036715	1373933333	2000762319
13	158	0.1170687	0.0351672	0.0071942	0.0175201	0.0163916	0.6123572	1227874101	2005654676
13	159	0.0885538	0.0186722	0.0081318	0.0140141	0.0162038	0.5937593	1581444162	2011535533
13	160	0.3989035	0.0232599	0.0036428	0.0253043	0.0204256	0.5645386	1332523697	2009045024
13	161	0.0769608	0.0113378	0.0121758	0.0102467	0.0158128	0.5609425	1598358871	2008508065
13	162	0.0723957	0.0244170	0.0083918	0.0189300	0.0221254	0.5221012	2056855967	2007983539
13	163	0.0568571	0.0171894	0.0066565	0.0081935	0.0127592	0.5109680	1543386167	2004178674
13	164	0.0753654	0.0193369	0.0058752	0.0143173	0.0157291	0.6128200	1560109091	2008749091
13	165	0.1376172	0.0287280	0.0072001	0.0171263	0.0243626	0.6934293	1646923788	2007923788
13	166	0.0908989	0.0344578	0.0054677	0.0159533	0.0158971	0.6639258	151024552	2006928315
13	167	0.1216306	0.0253739	0.0080136	0.0132217	0.0237154	0.5230412	1697853755	2011940711
13	168	0.1060624	0.0250852	0.0086789	0.0137833	0.0178849	0.7070138	1357947541	2011570492
13	169	0.1105815	0.0109533	0.0101589	0.0192529	0.0149594	0.3787694	1456827586	2012228448
13	170	0.2290090	0.0431267	0.0024695	0.0185374	0.0212719	0.6983890	162257027	2015908108
13	171	0.1791699	0.0481283	0.0075885	0.1497666	0.0232917	0.5077837	1387147186	201878355
13	172	0.1608969	0.0307432	0.0068296	0.0265567	0.0176139	0.6899642	143658277	2013886824
13	173	0.2274018	0.0116498	0.0048732	0.0152597	0.0179342	0.4147510	1293476987	2022259414
13	174	0.1207228	0.0238370	0.0048663	0.0256385	0.0177404	0.7308398	1368557423	2024098039
13	175	0.0728557	0.0187901	0.0096738	0.0124895	0.0159465	0.6740823	1568841232	2025736967
13	176	0.2000552	0.0250980	0.0119856	0.0176526	0.0234079	0.6705441	1636326761	202628169
13	177	0.1263264	0.0495458	0.0073313	0.0241349	0.0224769	0.6298803	1415630515	2024898897
13	178	0.2128976	0.0142571	0.0103529	0.0141002	0.0188584	0.5862658	1311377778	2030606667
13	179	0.2341381	0.0149839	0.0041996	0.0166959	0.0176324	0.5627158	1496485075	2029283582
13	180	0.1104484	0.0151927	0.0017825	0.0090086	0.0145619	0.5174414	1601870629	2030318182
13	181	0.2089538	0.0217469	0.0077883	0.0474428	0.0199095	0.5484437	1187003497	2032314685
13	182	0.1285168	0.0306888	0.0067572	0.0378783	0.0184213	0.4486576	1392625641	2037846154
13	183	0.1883274	0.0247998	0.0067937	0.0179324	0.0189082	0.3857130	1459624413	2038014085
13	184	0.1126864	0.0233953	0.0148483	0.0181219	0.0191833	0.5290319	1755675214	2043188034
13	185	0.0609527	0.0248887	0.0048117	0.0111512	0.0153134	0.6361241	1348984663	204691411
13	186	0.2539961	0.0223494	0.0040288	0.0213124	0.0195006	0.6196794	1503355623	2044674772
13	187	0.2360619	0.0148713	0.0021616	0.0149421	0.0182967	0.6985708	1614662651	2041385542
13	188	0.1167651	0.0379400	0.0022679	0.0136861	0.0149618	0.6328215	1594987952	2045228916
13	189	0.1555592	0.0185782	0.0058276	0.0154343	0.0197174	0.5508709	1430583799	2045013966
13	190	0.2034031	0.0254246	0.0121104	0.0250492	0.0352882	0.5953275	1637460486	2054194529
13	191	0.0508428	0.0141383	0.0076883	0.0112659	0.0201238	0.5709666	1567412281	2052407895
13	192	0.2005401	0.0270987	0.0083754	0.0209229	0.0214395	0.5917498	1732443114	2053491018
13	193	0.1077303	0.0225839	0.0090142	0.0146978	0.0177062	0.5265861	1184041096	2058454795
13	194	0.2063726	0.0467670	0.0120915	0.0324230	0.0324580	0.5715920	1692696429	2054330357
13	195	0.1301612	0.0210775	0.0075376	0.0255157	0.0171487	0.7049511	1534115028	2051545455
13	196	0.2591161	0.0300197	0.0059875	0.0158691	0.0270853	0.6111614	167062704	2056226107
13	197	0.0901477	0.0120068	0.0051965	0.0134753	0.0159929	0.3988865	1473465021	2058263374
13	198	0.1803044	0.0286948	0.0111062	0.0231782	0.0220808	0.6768657	1603895522	2057630597
13	199	0.1004547	0.0179881	0.0047267	0.0265700	0.0154400	0.5211329	13722343	2053410628
13	200	0.1360795	0.0312230	0.0081744	0.0245018	0.0206871	0.6869156	1517514986	2058337875
13	201	0.1190429	0.0265703	0.0074111	0.0121303	0.0193087	0.5873878	1782368644	2061961864
13	202	0.0949172	0.0289993	0.0076274	0.0199632	0.0195571	0.7050574	1571061489	2067834951
13	203	0.1200395	0.0220906	0.0093158	0.0186204	0.0195740	0.5719848	1420145324	207205036
13	204	0.1252861	0.0280741	0.0100027	0.0170937	0.0176954	0.6059415	158929863	2072
13	205	0.0864633	0.0176761	0.0091068	0.0476979	0.0196369	0.4444009	1384744444	2069288889
13	206	0.0946295	0.0192363	0.0038803	0.0113684	0.0147286	0.7523633	1437408421	2080.52
13	207	0.1585325	0.0250536	0.0116958	0.0177160	0.0218444	0.6126685	174571875	2075787109
13	208	0.1409187	0.0134585	0.0026880	0.0134033	0.0133849	0.5665470	1114051643	2077305164
13	209	0.1081870	0.0126697	0.0099186	0.0083861	0.0153484	0.4856109	1243486154	2077.56
13	210	0.1926307	0.0398802	0.0018246	0.0172712	0.0285131	0.6068246	1679848611	2083619444
13	211	0.1182362	0.0212556	0.0050907	0.0290988	0.0162018	0.5629384	1483894366	2079922535
13	212	0.0752598	0.0219008	0.0067931	0.0097075	0.0159220	0.5884282	1322303279	2079822404
13	213	0.1092452	0.0195570	0.0044702	0.0193640	0.0176979	0.5584273	1501839378	2086966321
13	214	0.0886304	0.0328636	0.0016253	0.0073063	0.0139417	0.6247074	1358490494	2084543726
13	215	0.1480526	0.0189901	0.0080177	0.0424792	0.0222938	0.5822455	1559657534	2086068493
13	216	0.0843137	0.0181046	0.0052179	0.0109804	0.0183878	0.5443137	1769388889	2089505556
13	217	0.0727140	0.0246263	0.0060474	0.0171035	0.0147156	0.6886818	1450576733	2090727723
13	218	0.0962234	0.0148470	0.0040131	0.0131838	0.0174105	0.5956359	1585680934	209363035
13	219	0.0637917	0.0234234	0.0015766	0.0145866	0.0146396	0.6373212	1357040541	2098814189
13	220	0.0899855	0.0190763	0.0091871	0.0198084	0.0159671	0.5782358	155669821	2107636829
13	221	0.1035228	0.0120527	0.0081866	0.0134707	0.0175030	0.6225656	1574497175	2109983051
13	222	0.1691202	0.0291962	0.0107484	0.0155631	0.0220614	0.6664614	1631989529	210897644
13	223	0.0947594	0.0214617	0.0077209	0.0144843	0.0159104	0.6815686	1459537662	2113797403
13	224	0.0925426	0.0244080	0.0082824	0.0225437	0.0173363	0.6022179	1538038251	2111357923
13	225	0.1540298	0.0241196	0.0058627	0.0118303	0.0175487	0.4222966	1757648829	2111478261
13	226	0.1098671	0.0285346	0.0077800	0.0218675	0.0195738	0.6284083	1438757125	2111224287
13	227	0.1251972	0.0174962	0.0071622	0.0135919	0.0196337	0.4930058	1782505495	2109556044
13	228	0.0914101	0.0153544	0.0066553	0.0095637	0.0169789	0.4841958	1295884187	2113641425
13	229	0.0909223	0.0225127	0.0096794	0.0154165	0.0202096	0.4542069	2588084656	2115074074
13	230	0.1355225	0.0309316	0.0055437	0.0106780	0.0202693	0.4569494	1191522088	2119674699
13	231	0.1408310	0.0277533	0.0091647	0.0159627	0.0215254	0.6607411	147704185	212496696
13	232	0.0958581	0.0346725	0.0016161	0.0062949	0.0174380	0.6276883	1641939481	2122236311
13	233	0.1301442	0.0327278	0.0071338	0.0209746	0.0196713	0.7135237	1412401471	2115707353
13	234	0.1206854	0.0217747	0.0068892	0.0133192	0.0195019	0.4732733	1294399399	2127981982
13	235	0.1001822	0.0182578	0.0036644	0.0061074	0.0162006	0.5262617	1819726776	213426776
13	236	0.1122876	0.0232898	0.0061438	0.0221133	0.0156645	0.3746405	1574011111	2135966667
13	237	0.1276292	0.0155417	0.0060221	0.0096257	0.0169967	0.5156333	1546461916	2144400491
13	238	0.2084138	0.0380380	0.0235901	0.0385965	0.0260062	0.6107570	1695179567	214044582
13	239	0.1596286	0.0208327	0.0076851	0.0160024	0.0175137	0.5621672	1409292191	2143279597
13	240	0.1031167	0.0179360	0.0065069	0.0244803	0.0194835	0.5421833	1441193344	2141602219
13	241	0.1333834	0.0071589	0.0055236	0.0745599	0.0242970	0.3889028	2546714894	2152080851
13	242	0.1240048	0.0144682	0.0043523	0.0078580	0.0159239	0.5508319	1239625	2154886364
13	243	0.1427030	0.0283327	0.0034347	0.0125411	0.0182919	0.6281879	1390513423	2155275168
13	244	0.1341129	0.0208717	0.0061540	0.0163714	0.0216867	0.5435507	1465045181	2155165663
13	245	0.1091044	0.0210366	0.0060944	0.0115861	0.0173159	0.5649515	157843833	2160013283
13	246	0.1022297	0.0211262	0.0084765	0.0439962	0.0259240	0.5966597	1292911504	2165254425
13	247	0.1160627	0.0269678	0.0053711	0.0157537	0.0225518	0.5388955	1328561605	2167332378
13	248	0.1458333	0.0211424	0.0118926	0.0738917	0.0244672	0.4028559	2546709239	2169366848
13	249	0.1038990	0.0180640	0.0068064	0.0140748	0.0208925	0.4807753	125816954	216941954
13	250	0.0741993	0.0169168	0.0240929	0.0984072	0.0319246	0.4571215	2522302053	2183797654
13	251	0.1144199	0.0351171	0.0082721	0.0192198	0.0176539	0.5008579	1474251736	2187284722
13	252	0.3121270	0.0487470	0.0192493	0.0223791	0.0315817	0.5532997	2651521905	2180860952
13	253	0.1383909	0.0268285	0.0098662	0.0237317	0.0316838	0.5483038	1750488095	2185603175
13	254	0.0705612	0.0150507	0.0111697	0.0208519	0.0199459	0.4968763	1261148276	2188027586
13	255	0.1239681	0.0320040	0.0067464	0.0188102	0.0219408	0.6935593	1430422034	2192533898
13	256	0.1495115	0.0280385	0.0066134	0.0108356	0.0196352	0.6237344	1596125436	2187982578
13	257	0.1223378	0.0312426	0.0081031	0.0157729	0.0168237	0.4907702	1627729282	2190980663
13	258	0.1270283	0.0290830	0.0099331	0.0186333	0.0178349	0.4768698	1397517964	2190236527
13	259	0.1411451	0.0384784	0.0057882	0.0115137	0.0188706	0.5025255	1565768	2190752
13	260	0.1244016	0.0301355	0.0052205	0.0069153	0.0196944	0.4346385	1885037855	2196485804
13	261	0.0785339	0.0270665	0.0083942	0.0121620	0.0179418	0.6539536	1501137255	2198594771
13	262	0.0832565	0.0179633	0.0086383	0.0174573	0.0183790	0.4795338	1579990783	2197543779
13	263	0.0980392	0.0141984	0.0056065	0.0121785	0.0176372	0.5065327	1351002513	2201296482
13	264	0.1348569	0.0271728	0.0055379	0.0079624	0.0163222	0.4475490	1139783784	2199807432
13	265	0.1034314	0.0261705	0.0077331	0.0157763	0.0148960	0.5074330	1181122449	2197834184
13	266	0.0778081	0.0366940	0.0102689	0.0122729	0.0282947	0.6091951	2658276284	2199770171
13	267	0.1158888	0.0233085	0.0056798	0.0158152	0.0144711	0.5063058	1217352113	2209755869
13	268	0.1142832	0.0295599	0.0095512	0.0244183	0.0178998	0.5124706	1398115556	2204831111
13	269	0.1162868	0.0243977	0.0037913	0.0063816	0.0143116	0.5446929	1126154982	2203804428
13	270	0.1482026	0.0167994	0.0137561	0.0135519	0.0183619	0.5529310	1836791667	2207630208
13	271	0.1173022	0.0180412	0.0084343	0.0159917	0.0190364	0.6168588	1644907035	2207266332
13	272	0.1195757	0.0253166	0.0083446	0.0150305	0.0183864	0.5151527	1728131148	2209783607
13	273	0.1125341	0.0430025	0.0127150	0.0231677	0.0192887	0.7487856	1439958409	2212383363
13	274	0.0792314	0.0129189	0.0037511	0.0091022	0.0136271	0.5045315	1318745819	221290301
13	275	0.1194479	0.0203391	0.0048814	0.0112528	0.0178619	0.5896613	1475585082	2217785548
13	276	0.1104594	0.0204359	0.0112932	0.0149503	0.0233224	0.5385199	1531175953	2218278592
13	277	0.0955270	0.0177206	0.0093873	0.0093260	0.0226961	0.5873284	2619509375	2220153125
13	278	0.1189076	0.0254482	0.0079412	0.0185574	0.0230812	0.6220308	1631128571	2220157143
13	279	0.1113270	0.0176471	0.0138480	0.0193803	0.0202556	0.6417367	164515625	2224955357
13	280	0.0782763	0.0200066	0.0033455	0.0037665	0.0166833	0.4726044	1993830508	2226361582
13	281	0.1003745	0.0173827	0.0069619	0.0317471	0.0202908	0.5001983	1354275281	2231280899
13	282	0.0646370	0.0190315	0.0138069	0.0190816	0.0169016	0.5995364	1925035144	2232853035
13	283	0.0857176	0.0272392	0.0080784	0.0218039	0.0195922	0.4977255	1419028	2235304
13	284	0.0858119	0.0226469	0.0066759	0.0141134	0.0162699	0.5399452	1436584392	2238981851
13	285	0.1236464	0.0207224	0.0112694	0.0796560	0.0203922	0.5055384	1603764912	2240873684
13	286	0.0918610	0.0160991	0.0220984	0.0518197	0.0529343	0.4219333	1535508772	2241045614
13	287	0.1463501	0.0155760	0.0030396	0.0110166	0.0164422	0.5938499	1379514056	2244417671
13	288	0.0784526	0.0263063	0.0072284	0.0057446	0.0214520	0.5757711	1228054054	2247256757
13	289	0.0632157	0.0225882	0.0121307	0.0018562	0.0276078	0.4489020	2619963333	2245093333
13	290	0.0709964	0.0191642	0.0029456	0.0031763	0.0173010	0.5099459	1260167421	2249656109
13	291	0.1147410	0.0264031	0.0118943	0.0114190	0.0172960	0.4273754	1657567493	2250699725
13	292	0.1173421	0.0192775	0.0062762	0.0185237	0.0165587	0.5562106	1449632829	2253762419
13	293	0.1380686	0.0231826	0.0061891	0.0128985	0.0182473	0.5633454	1473010204	2254867347
13	294	0.1184411	0.0191865	0.0120078	0.0425701	0.0237401	0.4287798	1606789256	2256958678
13	295	0.0817705	0.0439138	0.0103540	0.0226623	0.0207727	0.6174465	1489042904	2258871287
13	296	0.1116276	0.0280589	0.0111091	0.0170451	0.0202277	0.5672448	1713425532	2256197568
13	297	0.1366929	0.0179342	0.0072079	0.0078309	0.0188626	0.4065237	1695894081	2255775701
13	298	0.1694418	0.0274081	0.0169077	0.0258438	0.0213008	0.4042859	1035497268	2261721311
13	299	0.0886366	0.0497076	0.0039560	0.0163513	0.0151932	0.5627566	1413611111	2265853801
13	300	0.1120221	0.0413506	0.0058596	0.0243168	0.0191612	0.6906957	1432243243	2266094595
13	301	0.1047501	0.0221900	0.0107843	0.0156725	0.0173157	0.4997929	1633591549	2276799296
13	302	0.2111906	0.0181995	0.0060123	0.0124580	0.0225653	0.5425848	1174201657	2276129834
13	303	0.1151061	0.0141441	0.0060219	0.0040978	0.0173753	0.5903797	1950198502	2275280899
13	304	0.1027010	0.0357508	0.0080321	0.0121269	0.0177022	0.6397984	1482	227562249
13	305	0.1781543	0.0201549	0.0056834	0.0112745	0.0216184	0.5722791	1505668478	2276273551
13	306	0.1514012	0.0576370	0.0013970	0.0039721	0.0172768	0.5560801	1142463519	2281892704
13	307	0.1616075	0.0671007	0.0097291	0.0214639	0.0216884	0.4535998	1696438931	2283125954
13	308	0.0945259	0.0126565	0.0088101	0.0135590	0.0177706	0.5119205	1624739726	2286808219
13	309	0.2085851	0.0190991	0.0085215	0.0227451	0.0286804	0.4030525	2572816216	2286108108
13	310	0.0882036	0.0386451	0.0066205	0.0207037	0.0202056	0.6923516	1435177829	2287355658
13	311	0.1302957	0.0493250	0.0086146	0.0171810	0.0165220	0.5974928	1196233607	2288995902
13	312	0.1841316	0.0203749	0.0079103	0.0232705	0.0185340	0.5017690	1452882641	2286119804
13	313	0.1406848	0.0244669	0.0046419	0.0116389	0.0176642	0.5263363	1672341108	2290244898
13	314	0.1230218	0.0684738	0.0119883	0.0693680	0.0227097	0.5256020	1415548694	2289662708
13	315	0.1221817	0.0227631	0.0067613	0.0331034	0.0195898	0.6027226	1380137931	2296903448
13	316	0.1641337	0.0164538	0.0048287	0.0088759	0.0481474	0.5480288	1129900356	2302758007
13	317	0.1169358	0.0224048	0.0051423	0.0288831	0.0178201	0.6285275	1353823529	2303504902
13	318	0.1769077	0.0232380	0.0091058	0.0193772	0.0290293	0.5800401	1704216718	2303241486
13	319	0.2667677	0.0343011	0.0104098	0.0297063	0.0215686	0.6571573	1442420601	2308667382
13	320	0.0944550	0.0497575	0.0104153	0.0160096	0.0175838	0.4198890	1523913978	2309670251
13	321	0.1045730	0.0141880	0.0041170	0.0116409	0.0162204	0.5274770	13339701	2312210963
13	322	0.1996748	0.0253720	0.0069958	0.0108582	0.0205439	0.5318652	1639070352	2316020101
13	323	0.0566942	0.0168219	0.0062816	0.0191997	0.0210984	0.4413273	2237140271	2313294118
13	324	0.1163357	0.0222118	0.0090039	0.0149459	0.0211388	0.5910149	16140688	23186032
13	325	0.1382506	0.0332721	0.0070772	0.0185202	0.0178309	0.5682445	13779375	2318363281
13	326	0.0872624	0.0363419	0.0075837	0.0136507	0.0177119	0.6070548	1583961832	2319111959
13	327	0.1072157	0.0315817	0.0041394	0.0139085	0.0184052	0.6335425	1356537778	2322588889
13	328	0.1211400	0.0226080	0.0100932	0.0383371	0.0376728	0.4857388	247963388	2320786885
13	329	0.1550534	0.0223669	0.0056654	0.0165050	0.0197143	0.5950878	147294572	2323503132
13	330	0.1166513	0.0286557	0.0136579	0.0215256	0.0227795	0.4575819	2462802508	2329332288
13	331	0.1203033	0.0223791	0.0062431	0.0282458	0.0158850	0.5577412	1414330667	2330082667
13	332	0.2113218	0.0358451	0.0074218	0.0262410	0.0235294	0.6513585	1432352617	2328385675
13	333	0.1334816	0.0353436	0.0082221	0.0178942	0.0191794	0.5868347	1378302521	2334016807
13	334	0.2214824	0.0375566	0.0078000	0.0170868	0.0185951	0.4100840	1147714286	2336296703
13	335	0.2101363	0.0302011	0.0072782	0.0215769	0.0257478	0.5053340	1574336864	2347417373
13	336	0.1277647	0.0121569	0.0039608	0.0091895	0.0186275	0.5658170	1029386667	2345056667
13	337	0.1263809	0.0214091	0.0063476	0.0125823	0.0202858	0.5022798	1641571186	2343022034
13	338	0.1164296	0.0239267	0.0161733	0.0205690	0.0258875	0.5172754	1779454248	2346728758
13	339	0.1973027	0.0229024	0.0082811	0.0168110	0.0241167	0.6723400	1663238579	2348032995
13	340	0.1070647	0.0195881	0.0181299	0.0136368	0.0254015	0.4838309	2053155779	2353472362
13	341	0.1354534	0.0202696	0.0097917	0.0248284	0.0186520	0.6178922	10628125	2354.25
13	342	0.1570874	0.0360907	0.0058483	0.0297930	0.0199483	0.5702206	1203873264	2363085069
13	343	0.2208426	0.0388727	0.0092151	0.0209798	0.0198822	0.6112960	1187172012	2356078717
13	344	0.1408975	0.0179338	0.0059521	0.0186623	0.0192513	0.6302875	1513988142	2354857708
13	345	0.1602734	0.0295953	0.0090160	0.0567656	0.0211693	0.6706098	1451216514	2362383486
13	346	0.1604712	0.0333110	0.0076493	0.0155819	0.0182510	0.4794006	1358091255	2361969582
13	347	0.0911890	0.0320261	0.0069005	0.0356586	0.0181498	0.5619155	1241384615	2362320513
13	348	0.0973288	0.0106659	0.0091882	0.0095198	0.0141423	0.4487828	1752492754	2363410628
13	349	0.1165033	0.0223982	0.0048265	0.0135747	0.0186400	0.5931247	1510407051	2370660256
13	350	0.1152640	0.0106637	0.0023680	0.0176772	0.0215686	0.5983409	1317684615	2373042308
13	351	0.1187043	0.0245252	0.0072162	0.0198168	0.0187596	0.4405311	1373576803	2367310345
13	352	0.1695137	0.0224105	0.0038329	0.0057162	0.0179905	0.5195414	1011932203	2375785311
13	353	0.0911858	0.0366760	0.0031559	0.0095425	0.0169748	0.5991223	1178447619	237642381
13	354	0.3480849	0.0120289	0.0061160	0.0040638	0.0233262	0.4453927	2650419689	2376683938
13	355	0.1149075	0.0220359	0.0066795	0.0161444	0.0176837	0.5033169	1426462617	2374997664
13	356	0.1292507	0.0208203	0.0050677	0.0168798	0.0182249	0.5406366	1390362319	2376601449
13	357	0.1055445	0.0214918	0.0043414	0.0169866	0.0199253	0.5458762	1523417755	2383994778
13	358	0.0742040	0.0201295	0.0042274	0.0147688	0.0153625	0.5553337	1269899083	2391770642
13	359	0.1734165	0.0479264	0.0066038	0.0285310	0.0215908	0.5090426	1559620767	2384306998
13	360	0.1351337	0.0142170	0.0038698	0.0059600	0.0186145	0.5361995	1617068602	2383849604
13	361	0.1055065	0.0203595	0.0073856	0.0252288	0.0242810	0.4396896	1339504167	2389116667
13	362	0.0964143	0.0101614	0.0127613	0.0516087	0.0240277	0.4178312	2022872928	2389055249
13	363	0.0619991	0.0402813	0.0135976	0.0111893	0.0237639	0.3957801	2459059783	2388255435
13	364	0.0892725	0.0447570	0.0215544	0.0343706	0.0266837	0.4880080	1794228261	2389347826
13	365	0.1321792	0.0239638	0.0075701	0.0188632	0.0214818	0.4972450	1321183544	238964557
13	366	0.1213521	0.0378240	0.0079792	0.0170842	0.0223851	0.6967155	1458487382	2389402208
13	367	0.0902456	0.0249357	0.0072794	0.0186352	0.0159775	0.6650993	129735703	2391608215
13	368	0.1440622	0.0350721	0.0048218	0.0119743	0.0193612	0.6167592	1228707547	239613522
13	369	0.1729582	0.0263598	0.0064024	0.0160955	0.0164109	0.6329838	1195128261	2402423913
13	370	0.0769851	0.0233999	0.0060227	0.0139450	0.0176003	0.7972585	1253269725	2403833028
13	371	0.1017483	0.0445802	0.0058514	0.0155092	0.0190324	0.6215908	1439252822	2402632054
13	372	0.0866873	0.0317291	0.0108828	0.0225912	0.0137724	0.4731588	139362201	2406899522
13	373	0.2000164	0.0207892	0.0084995	0.0199524	0.0206087	0.5470014	1219937238	2407953975
13	374	0.0719819	0.0131745	0.0035002	0.0085724	0.0150705	0.4298493	1689070248	2410008264
13	375	0.1323558	0.0675637	0.0104997	0.0215054	0.0199874	0.6257030	1514780059	2412917889
13	376	0.1684037	0.0211977	0.0077960	0.0180769	0.0206442	0.4225284	147618018	2415624625
13	377	0.1204145	0.0350769	0.0076942	0.0185034	0.0145880	0.5857781	1284743671	2412096519
13	378	0.1210458	0.0344175	0.0080738	0.0153018	0.0183468	0.5486198	1059478431	2420792157
13	379	0.1345562	0.0172184	0.0070138	0.0162907	0.0207885	0.4646005	1491172043	242327957
13	380	0.0880952	0.0277634	0.0038677	0.0101702	0.0149644	0.7444840	1238997253	2418961538
13	381	0.1233347	0.0387176	0.0080877	0.0163293	0.0190554	0.6779967	1438806005	2423062356
13	382	0.2014398	0.0175239	0.0015156	0.0071043	0.0169935	0.5270247	1354227053	2422975845
13	383	0.1484710	0.0275177	0.0091553	0.0281478	0.0189777	0.6069462	1460763705	2421691871
13	384	0.1709397	0.0122983	0.0043281	0.0190149	0.0156439	0.5266506	1157038877	2425222462
13	385	0.1051471	0.0223942	0.0065531	0.0166796	0.0164990	0.4909443	1333177632	2426148026
13	386	0.0969684	0.0248644	0.0065081	0.0139897	0.0168683	0.5336115	1594687943	2419585106
13	387	0.1137959	0.0161991	0.0069382	0.0284364	0.0172549	0.6037205	1122269231	2424048718
13	388	0.1316478	0.0255590	0.0054237	0.0107900	0.0182548	0.5592134	1717646199	2424464912
13	389	0.1463651	0.0239544	0.0059505	0.0153495	0.0175468	0.6642448	1179764826	2425613497
13	390	0.0922632	0.0397215	0.0076452	0.0221587	0.0169104	0.4976141	1257162617	242711028
13	391	0.1313281	0.0194175	0.0059395	0.0087188	0.0179961	0.4774922	160587055	2426815534
13	392	0.0895193	0.0245272	0.0066458	0.0176384	0.0166493	0.6403523	1418938053	243550885
13	393	0.1235985	0.0287794	0.0086721	0.0152931	0.0189914	0.6593230	150998374	243202439
13	394	0.0917959	0.0147661	0.0064557	0.0140865	0.0176117	0.5203794	1735090253	2433963899
13	395	0.1116377	0.0261173	0.0089942	0.0204017	0.0170358	0.4394538	1278060729	2433751012
13	396	0.0937985	0.0219790	0.0080255	0.0180727	0.0164159	0.6177687	1135093023	2435569767
13	397	0.1323803	0.0166174	0.0088071	0.0177237	0.0181948	0.4070983	1215625698	2438013966
13	398	0.1106564	0.0490393	0.0081710	0.0156338	0.0173257	0.6293003	1050501672	2436571906
13	399	0.1098517	0.0235964	0.0041320	0.0117073	0.0144811	0.6421999	1195734146	2436182927
13	400	0.1754218	0.0121477	0.0058915	0.0165344	0.0166895	0.6786594	1336167442	2442416279
13	401	0.0705509	0.0224667	0.0052143	0.0150710	0.0138715	0.6716945	1313385103	2442857369
13	402	0.1124691	0.0419443	0.0065867	0.0136049	0.0186052	0.4758932	1023080906	2443210356
13	403	0.1376930	0.0211252	0.0087941	0.0209222	0.0220334	0.5840039	1482250681	2440291553
13	404	0.2592876	0.0166029	0.0086437	0.0139807	0.0190161	0.4811579	1692337278	2446639053
13	405	0.1400387	0.0167635	0.0080247	0.0197168	0.0165456	0.5180828	1396388889	244787963
13	406	0.0898068	0.0177088	0.0108247	0.0431278	0.0163130	0.6012344	1236268765	2448709443
13	407	0.0881994	0.0151363	0.0118843	0.0211980	0.0150407	0.3363223	1290338415	2450512195
13	408	0.1054973	0.0518645	0.0049483	0.0055045	0.0184528	0.5294118	1073.84	2450.64
13	409	0.1010721	0.0313562	0.0122702	0.0454527	0.0192328	0.6441156	1259619543	2449209979
13	410	0.0882982	0.0373750	0.0059224	0.0187789	0.0160636	0.7065055	1435616618	2455962099
13	411	0.1329950	0.0123030	0.0061361	0.0171165	0.0154402	0.4617147	1197478431	2454258824
13	412	0.0804308	0.0227142	0.0058180	0.0158236	0.0162355	0.7303557	1410923414	2455584245
13	413	0.1591979	0.0265597	0.0125847	0.0124242	0.0222103	0.5709091	1721859091	2456609091
13	414	0.1405732	0.0219080	0.0094174	0.0195419	0.0164121	0.5666290	1213134615	245903125
13	415	0.0904850	0.0118266	0.0082972	0.0057172	0.0162848	0.4167389	1780273684	2461389474
13	416	0.0874570	0.0318066	0.0074615	0.0204984	0.0147209	0.5786709	1280192748	2466209924
13	417	0.1538254	0.0238804	0.0076136	0.0215383	0.0179812	0.5428167	1334981067	2466361446
13	418	0.1124232	0.0258912	0.0088953	0.0208439	0.0189236	0.6488467	1496365854	2466971857
13	419	0.1117404	0.0155111	0.0066852	0.0186445	0.0171167	0.5953292	1228813896	2466870968
13	420	0.1307596	0.0248224	0.0086482	0.0308298	0.0222974	0.5495868	1305827372	2468741835
13	421	0.0979879	0.0237758	0.0064470	0.0067858	0.0169695	0.5332512	1618963351	2466895288
13	422	0.1014333	0.0171387	0.0073233	0.0202194	0.0210832	0.7460536	1258298246	2471846004
13	423	0.1267934	0.0185796	0.0070899	0.0178981	0.0146700	0.4020445	1020948171	2474896341
13	424	0.1332342	0.0183195	0.0082537	0.0160119	0.0182487	0.6242373	1466061372	2470776173
13	425	0.1796104	0.0277536	0.0085367	0.0117395	0.0198348	0.5867978	1711054662	247096463
13	426	0.0882938	0.0437688	0.0090360	0.0331267	0.0168713	0.5331072	135211332	2480437376
13	427	0.0894168	0.0157743	0.0068753	0.0113374	0.0186400	0.4761438	168286859	2468233974
13	428	0.1246769	0.0406869	0.0106768	0.0271868	0.0188567	0.7695444	1418404227	2479015852
13	429	0.1036146	0.0179937	0.0066548	0.0100911	0.0169439	0.4262032	1736724747	2475161616
13	430	0.1147929	0.0322356	0.0059581	0.0158907	0.0192823	0.5988039	1519555985	2480057915
13	431	0.1081021	0.0291380	0.0232926	0.0294636	0.0301295	0.4383426	1794758491	2481898113
13	432	0.1441253	0.0216147	0.0089950	0.0180566	0.0182358	0.6299288	1566754569	248237859
13	433	0.1180456	0.0329614	0.0067166	0.0169775	0.0161858	0.6418194	1448239837	2486906504
13	434	0.1083227	0.0349425	0.0083653	0.0177536	0.0187980	0.6624680	1475413043	2485475543
13	435	0.1171853	0.0306469	0.0172989	0.0083636	0.0286531	0.4716438	2350441121	248306729
13	436	0.1081926	0.0455640	0.0080179	0.0298389	0.0180353	0.4925063	1385683168	2485811881
13	437	0.1302940	0.0224043	0.0074546	0.0260952	0.0194864	0.6152897	1540936017	2481301342
13	438	0.1227992	0.0431643	0.0097498	0.0189723	0.0225828	0.5251386	1492117241	2487689655
13	439	0.1021646	0.0251274	0.0070360	0.0225184	0.0173087	0.6235376	1288330561	2488509356
13	440	0.1300689	0.0386144	0.0103516	0.0371711	0.0204454	0.5969804	1326814896	2490341731
13	441	0.1542679	0.0252658	0.0030046	0.0125841	0.0187689	0.5293728	1610074627	2489512438
13	442	0.1075362	0.0297313	0.0205350	0.0287916	0.0303577	0.4960972	1818453674	2489035144
13	443	0.1166898	0.0277449	0.0063400	0.0213041	0.0155771	0.3982114	1230486081	2495421842
13	444	0.0957268	0.0241503	0.0087301	0.0309101	0.0190947	0.7131933	1266260097	2495500808
13	445	0.1236777	0.0188334	0.0126710	0.0136596	0.0182402	0.5630582	1778277311	2498058824
13	446	0.1364304	0.0279638	0.0107290	0.0485772	0.0247662	0.5660835	1649394872	2499876923
13	447	0.1225707	0.0109283	0.0096343	0.0144554	0.0292184	0.5344932	167282495	2507293763
13	448	0.0942975	0.0314175	0.0088595	0.0213078	0.0161180	0.7702465	1303713303	2499995413
13	449	0.1284993	0.0380207	0.0089186	0.0236706	0.0287111	0.7518766	1490515235	250665374
13	450	0.1353817	0.0320598	0.0140018	0.0245266	0.0202951	0.6226130	1194563574	2505333333
13	451	0.0927144	0.0227902	0.0081438	0.0277141	0.0177661	0.5786632	1118389776	2509648562
13	452	0.1347384	0.0201238	0.0073906	0.0166389	0.0152100	0.4464396	1213220648	2510257085
13	453	0.1159314	0.0405929	0.0073529	0.0143091	0.0289799	0.6101541	1507383929	2512345238
13	454	0.1026588	0.0240713	0.0062359	0.0217018	0.0148781	0.4027001	1235306792	2512836066
13	455	0.1425266	0.0216634	0.0058710	0.0116358	0.0207229	0.6932226	1550251451	2509617021
13	456	0.1042735	0.0314117	0.0118094	0.0373443	0.0169097	0.6196861	1423690883	250861396
13	457	0.1544213	0.0199283	0.0043793	0.0109407	0.0156252	0.5709316	1623906615	2515097276
13	458	0.0869318	0.0313726	0.0202651	0.0294446	0.0354256	0.3913025	2371932961	2516385475
13	459	0.0847059	0.0339477	0.0095686	0.0331503	0.0174510	0.6487647	1336461667	2519241667
13	460	0.1286032	0.0301698	0.0115626	0.0131292	0.0195472	0.5772691	1712646907	2515244845
13	461	0.1015168	0.0317002	0.0108979	0.0311083	0.0196290	0.5651710	1196080863	252377628
13	462	0.1343496	0.0247310	0.0134326	0.0356528	0.0189383	0.5048362	144597561	2514963415
13	463	0.1116897	0.0250938	0.0072003	0.0236901	0.0179578	0.6917390	1306062842	2521800546
13	464	0.1452241	0.0279272	0.0124370	0.0209524	0.0188796	0.5244118	1158539286	2522553571
13	465	0.0630265	0.0237580	0.0071485	0.0190451	0.0153170	0.3915326	1246304933	2528636771
13	466	0.1179960	0.0297676	0.0102854	0.0390482	0.0169283	0.5319657	1392914591	2527455516
13	467	0.1385593	0.0216019	0.0132104	0.0205052	0.0247507	0.6335577	1641875	2534141949
13	468	0.1420959	0.0238296	0.0120649	0.0212778	0.0201051	0.6447697	1489583732	2528337321
13	469	0.1378927	0.0105706	0.0062419	0.0167176	0.0176810	0.5663749	1608134948	2530532872
13	470	0.1138629	0.0229174	0.0070751	0.0178094	0.0158986	0.4327526	1221305732	2534447452
13	471	0.0843398	0.0281877	0.0077985	0.0237006	0.0172192	0.5640436	1365865275	2538096774
13	472	0.0639696	0.0139654	0.0051957	0.0107554	0.0147762	0.4661537	1548839662	2533130802
13	473	0.1034547	0.0250817	0.0096055	0.0147292	0.0232260	0.5650560	2153407738	2539494048
13	474	0.1123239	0.0272721	0.0062328	0.0506524	0.0219190	0.6219787	131381749	2538771863
13	475	0.1003045	0.0268502	0.0091747	0.0388341	0.0191613	0.6981691	1338049689	2539182195
13	476	0.0837588	0.0315113	0.0072697	0.0237421	0.0178783	0.5402701	1262139151	2548707547
13	477	0.0788340	0.0200805	0.0096814	0.0198179	0.0160189	0.4094888	144790625	2550598214
13	478	0.1013575	0.0175591	0.0107969	0.0116013	0.0220463	0.4872423	1668599359	2546413462
13	479	0.1377232	0.0303848	0.0110697	0.0345478	0.0176763	0.5879061	1207591418	254854291
13	480	0.1453735	0.0244344	0.0128271	0.0161060	0.0203423	0.5050823	1585070234	2550254181
13	481	0.0904963	0.0300185	0.0099061	0.0210768	0.0161014	0.6594750	1427687296	2553467427
13	482	0.1304176	0.0294796	0.0071651	0.0219811	0.0187602	0.6761655	1239528818	2554773775
13	483	0.0906667	0.0306727	0.0108959	0.0255204	0.0197285	0.4837165	1400710769	2557910769
13	484	0.1260898	0.0220783	0.0073514	0.0258919	0.0150387	0.4738023	1179868502	2557314985
13	485	0.2962704	0.0395996	0.0064034	0.0227067	0.0143837	0.4616345	1142087413	2555940559
13	486	0.0843477	0.0172050	0.0093052	0.0181344	0.0142242	0.5931996	1081855491	2560939306
13	487	0.0771019	0.0299763	0.0094397	0.0282948	0.0174346	0.6762096	1355318885	2559394737
13	488	0.1116431	0.0143031	0.0089603	0.0117875	0.0194330	0.5334169	1643317829	2560715116
13	489	0.0938785	0.0227403	0.0105611	0.0108800	0.0173442	0.6159653	2186949187	2559512195
13	490	0.0968004	0.0313479	0.0216014	0.0517926	0.0259004	0.5026746	2290583682	2563441423
13	491	0.1383266	0.0298087	0.0148289	0.1125744	0.0167024	0.5668890	1203688259	2567038462
13	492	0.0614210	0.0246679	0.0118237	0.0227282	0.0144297	0.6018385	1409137634	2572098925
13	493	0.0775629	0.0555108	0.0118274	0.0600680	0.0169397	0.6070015	1372527397	2578296804
13	494	0.1076207	0.0156451	0.0060389	0.0134701	0.0153814	0.5654556	1083428571	2587094538
13	495	0.1413926	0.0476918	0.0094488	0.0218311	0.0186197	0.5405589	1476133858	2583448819
13	496	0.1349005	0.0144649	0.0055917	0.0225141	0.0160174	0.5987124	1233669794	2583906191
13	497	0.1903240	0.0121910	0.0102515	0.0174339	0.0183078	0.5543905	1699163043	2587445652
13	498	0.0605526	0.0144544	0.0116630	0.0187602	0.0166695	0.6239476	2277305476	2588391931
13	499	0.0954248	0.0114846	0.0062247	0.0130563	0.0177716	0.5324463	110443254	2589920635
13	500	0.1079194	0.0119281	0.0212636	0.0557081	0.0287473	0.4833333	2471047222	2586.7
13	501	0.0631679	0.0285444	0.0073912	0.0123916	0.0164443	0.5674466	1055223048	2593524164
13	502	0.1215686	0.0185164	0.0107505	0.0426543	0.0168743	0.5345117	1219051724	2589115764
13	503	0.0942498	0.0251304	0.0119410	0.0107072	0.0242491	0.4597195	1969531835	2592277154
13	504	0.1001641	0.0260563	0.0161703	0.0143326	0.0194274	0.5037083	1641889121	2595508368
13	505	0.1642157	0.0107717	0.0090749	0.0153092	0.0193690	0.5598416	2220907051	2599602564
13	506	0.0859059	0.0396098	0.0115613	0.0522325	0.0182096	0.6500652	1385852512	260804376
13	507	0.1349716	0.0300826	0.0118163	0.0288313	0.0206398	0.5280573	1420940789	2604532895
13	508	0.1719155	0.0242986	0.0099397	0.0292459	0.0226848	0.5222172	1478376923	2602.4
13	509	0.0972231	0.0280084	0.0140141	0.0239076	0.0179556	0.6684085	1459005076	2607195431
13	510	0.1554412	0.0176765	0.0127941	0.0208235	0.0206176	0.5219412	1706025	2606775
13	511	0.1427413	0.0268854	0.0121041	0.0191365	0.0192685	0.5544118	1591836538	2604600962
13	512	0.1612936	0.0349716	0.0092861	0.0233172	0.0178593	0.5924200	1439841991	2610348485
13	513	0.1281498	0.0182373	0.0090372	0.0270032	0.0216568	0.6892734	1527093426	2609204152
13	514	0.1175863	0.0182270	0.0070312	0.0175476	0.0143772	0.6597294	1131214085	261805493
13	515	0.1237090	0.0472887	0.0144940	0.0656611	0.0233139	0.6288300	1538589744	2616377289
13	516	0.0941539	0.0320667	0.0099982	0.0277877	0.0174114	0.6988629	1404143989	2621430647
13	517	0.1059260	0.0338488	0.0090267	0.0227495	0.0189588	0.6820202	123823783	2617586926
13	518	0.1838062	0.0301269	0.0090242	0.0213979	0.0164798	0.6331165	1178917647	2625536471
13	519	0.1548868	0.0314232	0.0087349	0.0178143	0.0160511	0.5335259	1161449612	2624428941
13	520	0.0831686	0.0108392	0.0177882	0.0118118	0.0200314	0.4818039	1854648	2627552
13	521	0.0618462	0.0110886	0.0090124	0.0131249	0.0153204	0.5640298	1737989858	2636196755
13	522	0.1234437	0.0234665	0.0094266	0.0240896	0.0170926	0.6272738	1212109329	2629465015
13	523	0.1944295	0.0339517	0.0128112	0.0269436	0.0222293	0.6495323	1440803235	2631177898
13	524	0.1262062	0.0122691	0.0080709	0.0219836	0.0143845	0.4674152	1102	2635912863
13	525	0.1208976	0.0212645	0.0124043	0.0231624	0.0196288	0.5827514	1637451872	2636334225
13	526	0.1788952	0.0219692	0.0280413	0.0375079	0.0219271	0.6051023	1533543011	263761828
13	527	0.1229493	0.0319179	0.0364195	0.0490776	0.0194222	0.5927022	1334204142	2638846154
13	528	0.0539828	0.0168873	0.0103922	0.0081250	0.0148529	0.4524755	1969.65	2638759375
13	529	0.0986906	0.0252485	0.0107977	0.0260945	0.0172173	0.6789081	1412563356	2638849315
13	530	0.0580955	0.0121453	0.0061388	0.0131215	0.0134690	0.4878465	1236223629	2644084388
13	531	0.1571672	0.0226699	0.0075208	0.0190169	0.0140568	0.4316949	1170552511	264673516
13	532	0.1244498	0.0154782	0.0105642	0.0179272	0.0177831	0.6360944	1442408163	2652338776
13	533	0.1182898	0.0194118	0.0124619	0.0217429	0.0186819	0.4781373	1036502778	2652677778
13	534	0.1628135	0.0324137	0.0071591	0.0153215	0.0139535	0.6000152	1188315891	2664315891
13	535	0.0902106	0.0219172	0.0087146	0.0228322	0.0149310	0.5407843	1131362963	2660425926
13	536	0.0561106	0.0060688	0.0030344	0.0144777	0.0132433	0.5684217	1746639344	2660419672
13	537	0.1322975	0.0111876	0.0062449	0.0173141	0.0177580	0.6006067	1524388679	2661075472
13	538	0.1051807	0.0188485	0.0115340	0.0154075	0.0189062	0.6275952	2286852941	2661593137
13	539	0.1080406	0.0228314	0.0101300	0.0249254	0.0173394	0.5660192	1414480094	2660166276
13	540	0.1168758	0.0245723	0.0141654	0.0165336	0.0205855	0.5571887	2253833795	2662855956
13	541	0.1013376	0.0490044	0.0074783	0.0191518	0.0176471	0.3873841	1355325581	2674205426
13	542	0.0774357	0.0217678	0.0108762	0.0369945	0.0168199	0.4511795	1443207031	2667140625
13	543	0.0786542	0.0278966	0.0127718	0.0668271	0.0150980	0.3971390	1253	2676102273
13	544	0.0900423	0.0235755	0.0123030	0.0185160	0.0175471	0.5398232	150332549	2669203922
13	545	0.0999066	0.0161116	0.0058409	0.0243801	0.0133520	0.4555141	1225600529	2675002646
13	546	0.1116429	0.0236623	0.0067944	0.0171190	0.0168310	0.5842916	1157766478	2677065913
13	547	0.1819166	0.0191549	0.0090472	0.0236178	0.0226567	0.6099420	2240380282	2672808451
13	548	0.1201070	0.0237790	0.0096791	0.0189572	0.0194385	0.5949822	2265454545	2680970455
13	549	0.0800000	0.0205991	0.0095970	0.0099455	0.0170370	0.5086166	1657255556	2675833333
13	550	0.1973539	0.0175614	0.0091376	0.0226823	0.0211308	0.6004759	1506684466	268756068
13	551	0.0939856	0.0286063	0.0071961	0.0126296	0.0145309	0.5309632	1190244108	2685104377
13	552	0.1003807	0.0616029	0.0123358	0.0429659	0.0205026	0.4685704	1415742718	2696432039
13	553	0.0760510	0.0307622	0.0086824	0.0111543	0.0214694	0.5819333	2252785992	2696342412
13	554	0.1233951	0.0399678	0.0090035	0.0219071	0.0232071	0.6515821	1099284932	2700331507
13	555	0.1082484	0.0228366	0.0149804	0.0252288	0.0269020	0.5945752	2281333333	2698826667
13	556	0.1480188	0.0312194	0.0068832	0.0195772	0.0178105	0.6175552	1202328125	2698700521
13	557	0.1258533	0.0546115	0.0086964	0.0263798	0.0238562	0.3901053	1367865741	2705768519
13	558	0.1064982	0.0233664	0.0138749	0.0187475	0.0211656	0.6175157	1486549654	2699681293
13	559	0.0977014	0.0266151	0.0120510	0.0506712	0.0197052	0.6194189	1274357664	2697689051
13	560	0.1775894	0.0120473	0.0120002	0.0283224	0.0248366	0.6630042	1569453453	2707948949
13	561	0.0817482	0.0171981	0.0078065	0.0146692	0.0167583	0.5941910	1590373832	2708579439
13	562	0.0905703	0.0333483	0.0086514	0.0393205	0.0193983	0.5144140	1317099237	2708580153
13	563	0.1210485	0.0180888	0.0126481	0.0165944	0.0206563	0.5477977	1726090526	2701216842
13	564	0.0469422	0.0068664	0.0054960	0.0111962	0.0145054	0.4933013	1771081784	2709085502
13	565	0.1120390	0.0134410	0.0059128	0.0142335	0.0175658	0.6016966	1062580311	270773057
13	566	0.1344620	0.0333716	0.0110952	0.0274797	0.0182114	0.5565567	1426.6	2710229268
13	567	0.0915082	0.0329632	0.0109291	0.0225838	0.0170350	0.6180466	125175514	2704497196
13	568	0.0857241	0.0348125	0.0085999	0.0221141	0.0170623	0.6409160	1298140351	2713200501
13	569	0.1506356	0.0242499	0.0120838	0.0290052	0.0274510	0.4895065	1503383202	2712393701
13	570	0.1820632	0.0313995	0.0080453	0.0308200	0.0224917	0.6065360	1113587629	2713357388
13	571	0.1527474	0.0341471	0.0127490	0.0376114	0.0202046	0.5719833	1179646245	2719280632
13	572	0.1104496	0.0126624	0.0082841	0.0051973	0.0239074	0.5751792	2281144578	2715192771
13	573	0.1757743	0.0530052	0.0100440	0.0212005	0.0225210	0.5657543	1614259184	2716667347
13	574	0.0605114	0.0195575	0.0202544	0.0584708	0.0222614	0.5997061	1929492505	2713134904
13	575	0.1769684	0.0284830	0.0114005	0.0185941	0.0228434	0.5380441	1644035604	2720783282
13	576	0.1205478	0.0380681	0.0103566	0.0332101	0.0177632	0.6383427	1157312388	272367325
13	577	0.1117647	0.0227208	0.0082879	0.0233677	0.0180513	0.4487164	119642268	2719309278
13	578	0.0785272	0.0256209	0.0153028	0.0145011	0.0284793	0.6781351	1905288889	2722846667
13	579	0.0525043	0.0089404	0.0055877	0.0083714	0.0163974	0.5175048	2466766839	2726435233
13	580	0.0964616	0.0145218	0.0118549	0.0155210	0.0202464	0.6507700	158454023	2726099617
13	581	0.1230747	0.0121910	0.0084399	0.0156863	0.0210003	0.5678886	2330626812	2728358696
13	582	0.1382395	0.0198915	0.0094618	0.0269504	0.0172883	0.5460826	1212387234	273246383
13	583	0.1775009	0.0100405	0.0063817	0.0156547	0.0179888	0.5756400	1776533512	2731088472
13	584	0.1074447	0.0227640	0.0096152	0.0294118	0.0175946	0.6839677	1295794118	2729852941
13	585	0.1140215	0.0640241	0.0088367	0.0275144	0.0172084	0.4839808	1386716981	2736566038
13	586	0.1839947	0.0272383	0.0137188	0.0369757	0.0260552	0.6838152	1553969492	2735411864
13	587	0.2196802	0.0266913	0.0124738	0.0285363	0.0255191	0.6159540	1524162362	2743699262
13	588	0.1525012	0.0461865	0.0121738	0.0245870	0.0188282	0.5640497	1321942913	2739037402
13	589	0.1552221	0.0343257	0.0141016	0.0309324	0.0227451	0.5858103	1473589796	2742467347
13	590	0.1680968	0.0399118	0.0128468	0.0309452	0.0211861	0.6210207	1490393673	2751704745
13	591	0.1264381	0.0351023	0.0081648	0.0207025	0.0186148	0.6621075	1156520863	2746276259
13	592	0.1037160	0.0371600	0.0129349	0.0274352	0.0182954	0.5212682	1299149194	2746092742
13	593	0.1367121	0.0590340	0.0132713	0.0366899	0.0214578	0.6845131	1432279661	2749943503
13	594	0.1194897	0.0250886	0.0094496	0.0269785	0.0173163	0.5902906	1203620482	2750587349
13	595	0.1297628	0.0319377	0.0102577	0.0338556	0.0176899	0.6491481	1248272926	2750443231
13	596	0.1695024	0.0244255	0.0173308	0.0430002	0.0295277	0.6688910	2245104839	2754491935
13	597	0.1254180	0.0207843	0.0067183	0.0221569	0.0157895	0.5520537	1228.7	2752042105
13	598	0.1668731	0.0225361	0.0176084	0.0201625	0.0249097	0.5725619	1717391447	2752539474
13	599	0.1938499	0.0116924	0.0170176	0.0287244	0.0272773	0.6448303	2218653137	2756571956
13	600	0.1417189	0.0269708	0.0158197	0.0273709	0.0266329	0.6052732	2260430839	2756333333
13	601	0.0578431	0.0121339	0.0080978	0.0056404	0.0168577	0.4836389	2373584416	2757847403
13	602	0.1685525	0.0461890	0.0133468	0.0483335	0.0192029	0.5308589	1184546845	275614914
13	603	0.1271523	0.0153110	0.0148897	0.0188802	0.0198070	0.5638863	1670523438	2756712891
13	604	0.1177026	0.0509137	0.0147309	0.0311281	0.0224963	0.6844859	1421507082	276311898
13	605	0.1000484	0.0159768	0.0154200	0.0141370	0.0312757	0.5303438	2345024691	2761348765
13	606	0.1729902	0.0366667	0.0099118	0.0208431	0.0213725	0.5505784	1306725	2771.62
13	607	0.1955005	0.0210373	0.0132128	0.0235667	0.0235046	0.7040676	1535733756	2762751189
13	608	0.1455677	0.0313334	0.0093069	0.0239521	0.0210559	0.6664319	1509582834	2767632735
13	609	0.2124003	0.0235970	0.0077079	0.0288844	0.0194997	0.6177282	1071131034	2775737931
13	610	0.2297374	0.0230808	0.0160915	0.0223790	0.0222270	0.6231387	1719429889	2779409594
13	611	0.1872988	0.0330041	0.0074773	0.0230319	0.0201493	0.5554726	1437807836	277755597
13	612	0.1579673	0.0193741	0.0203793	0.0236054	0.0269542	0.6811256	2276023845	2778365127
13	613	0.1074418	0.0370714	0.0063066	0.0233689	0.0172457	0.7101250	1338298246	2779906433
13	614	0.3377609	0.0284178	0.0195807	0.0494443	0.0252914	0.6799494	1678221198	2777836406
13	615	0.1005736	0.0369881	0.0086835	0.0189276	0.0237162	0.6219955	1250510204	2779568027
13	616	0.0757881	0.0096198	0.0116130	0.0010183	0.0234861	0.4413823	2560552486	2783640884
13	617	0.1463279	0.0196233	0.0100940	0.0206598	0.0174808	0.6964768	1114976331	2778074951
13	618	0.2395633	0.0215534	0.0124234	0.0367213	0.0253347	0.7517702	2248228616	2780488336
13	619	0.1744314	0.0292288	0.0109978	0.0234074	0.0199390	0.5239390	1291217778	2783733333
13	620	0.0995026	0.0119045	0.0104000	0.0139680	0.0200354	0.5988655	1801052411	2784203354
13	621	0.1281390	0.0452012	0.0067997	0.0251003	0.0211558	0.6928334	150528655	2789964912
13	622	0.1117883	0.0126813	0.0147980	0.0347555	0.0236050	0.5363100	1691951807	2790525301
13	623	0.1957552	0.0210730	0.0081663	0.0335273	0.0254471	0.4616462	2142752747	2790362637
13	624	0.0885836	0.0385191	0.0071207	0.0227038	0.0198142	0.6043473	1258713816	2791552632
13	625	0.1079739	0.0250846	0.0074543	0.0239249	0.0157466	0.5616491	1219494017	2798936752
13	626	0.1373260	0.0165295	0.0203800	0.0239561	0.0485929	0.6790206	2202601036	2798357513
13	627	0.0819421	0.0289374	0.0144687	0.0236116	0.0171055	0.7282988	1333474286	2799737143
13	628	0.0992088	0.0227898	0.0201066	0.0162367	0.0289474	0.4764706	2334657895	2800855263
13	629	0.1452373	0.0223187	0.0065574	0.0193185	0.0179685	0.5862209	1713543716	2801680328
13	630	0.1007558	0.0295980	0.0131449	0.0186001	0.0162121	0.5106145	1151944134	2805391061
13	631	0.1827714	0.0269055	0.0101284	0.0226454	0.0225420	0.7000988	1500971223	2805417266
13	632	0.1457971	0.0544754	0.0125111	0.0422013	0.0220722	0.4119424	1437311178	2813664653
13	633	0.1165624	0.0217042	0.0119212	0.0164164	0.0222570	0.5012516	1057656915	2812077128
13	634	0.1315543	0.0353324	0.0150741	0.0244668	0.0219417	0.6605835	1464441463	280832439
13	635	0.1277297	0.0328624	0.0138793	0.0217897	0.0214341	0.6875529	1482372549	2811433824
13	636	0.0777382	0.0102793	0.0162606	0.0090909	0.0273916	0.4108735	2236979798	2814777778
13	637	0.0974703	0.0273291	0.0085746	0.0303566	0.0181042	0.4239460	128519171	2821.5
13	638	0.1192296	0.0221939	0.0151999	0.0477767	0.0172842	0.5922727	131628937	2813519685
13	639	0.1473421	0.0258388	0.0042702	0.0243573	0.0206318	0.4751198	1567622222	2822344444
13	640	0.0943179	0.0186775	0.0052994	0.0218100	0.0164635	0.5822057	1092855856	2820627628
13	641	0.0823529	0.0095552	0.0122769	0.0120574	0.0204712	0.6088382	178155597	2820716418
13	642	0.2021569	0.0229225	0.0068721	0.0226050	0.0154995	0.4956956	1183252381	2827038095
13	643	0.1077324	0.0477884	0.0373656	0.0217185	0.0217054	0.5232102	159820598	2823774086
13	644	0.0861514	0.0253935	0.0085378	0.0215335	0.0182801	0.5849116	1363573991	2825486547
13	645	0.1124095	0.0607317	0.0089485	0.0352020	0.0174760	0.5629425	1392013423	2832822148
13	646	0.1035209	0.0419191	0.0088689	0.0195117	0.0163808	0.5410803	1239438692	2838566757
13	647	0.1727117	0.0223392	0.0054542	0.0222622	0.0188372	0.6330765	1549436681	2834366812
13	648	0.1030253	0.0325388	0.0138155	0.0286956	0.0204219	0.6441079	1313381238	2840065868
13	649	0.1005456	0.0335038	0.0045865	0.0244331	0.0148849	0.5515090	1103178261	2835165217
13	650	0.0943877	0.0430668	0.0083245	0.0224257	0.0180228	0.6997417	1373461078	2839601796
13	651	0.0853257	0.0277251	0.0164875	0.0192916	0.0209572	0.4822686	1588876344	2845026882
13	652	0.1013195	0.0323503	0.0118488	0.0538296	0.0166956	0.5393261	1256410188	2845126005
13	653	0.1873366	0.0114379	0.0038725	0.0178595	0.0169771	0.5959314	1046708333	2848866667
13	654	0.2709462	0.0199984	0.0094378	0.0290294	0.0221300	0.5871125	1189385892	2853302905
13	655	0.0792440	0.0184448	0.0065533	0.0170954	0.0155521	0.5163200	1435425856	2855532319
13	656	0.1200612	0.0529978	0.0098606	0.0312705	0.0205032	0.6431713	1388274566	2857393064
13	657	0.1344352	0.0231740	0.0105444	0.0219418	0.0187193	0.6929921	1205350453	2863075529
13	658	0.0487485	0.0176534	0.0097976	0.0120926	0.0161402	0.5270034	1590106109	2865607717
13	659	0.2924934	0.0150278	0.0052239	0.0235587	0.0228124	0.5945127	105633209	2867179104
13	660	0.1268784	0.0133148	0.0078316	0.0198623	0.0184395	0.5395222	1701516224	287040118
13	661	0.1437909	0.0231808	0.0078182	0.0224961	0.0166324	0.6414690	1218292063	2875698413
13	662	0.0937037	0.0269281	0.0068410	0.0251198	0.0193464	0.5421787	1289894444	2877722222
13	663	0.1368627	0.0363361	0.0083025	0.0193277	0.0230476	0.6395798	1123375714	2875194286
13	664	0.4120358	0.0150538	0.0083491	0.0276678	0.0217945	0.5355200	1391202765	2880557604
13	665	0.1173856	0.0373529	0.0089542	0.0192484	0.0211438	0.5950490	1502233333	2886125
13	666	0.1330040	0.0160355	0.0035124	0.0140498	0.0182208	0.5946914	1528697201	2885585242
13	667	0.3428664	0.0231394	0.0077131	0.0172029	0.0181779	0.5830571	119260221	2894154696
13	668	0.0824427	0.0107395	0.0034089	0.0118672	0.0160707	0.4968730	2320356209	2894013072
13	669	0.1047048	0.0180729	0.0095358	0.0182936	0.0180729	0.5187300	1631010724	2897579088
13	670	0.1388033	0.0232265	0.0067155	0.0252630	0.0165615	0.5472692	1465004292	2904815451
13	671	0.1345668	0.0120789	0.0053645	0.0140106	0.0172107	0.5065340	1610632047	2912985163
13	672	0.2036922	0.0335856	0.0074189	0.0248366	0.0236670	0.6633643	1303099415	2916377193
13	673	0.1329369	0.0183971	0.0114968	0.0282439	0.0195650	0.4624558	1683210383	2917311475
13	674	0.2386708	0.0205031	0.0122610	0.0188488	0.0224298	0.5376733	1249610422	2918813896
13	675	0.1835112	0.0239124	0.0046329	0.0228454	0.0228637	0.5925946	1272806977	292987907
13	676	0.1854622	0.0271242	0.0066200	0.0149953	0.0142670	0.5904482	1091.65	2936659524
13	677	0.1363087	0.0204400	0.0133949	0.0160283	0.0192544	0.6155039	1701122093	2933936047
13	678	0.1217259	0.0321981	0.0131505	0.0170819	0.0231559	0.5733746	131260401	2939503759
13	679	0.1662012	0.0198392	0.0074256	0.0192467	0.0195006	0.6082946	1733096403	2939411511
13	680	0.1147161	0.0218468	0.0047086	0.0139765	0.0140715	0.6076667	107749481	2941685121
13	681	0.1687150	0.0099790	0.0049195	0.0133754	0.0214111	0.5329832	1229464286	2941888393
13	682	0.1903449	0.0186800	0.0064513	0.0201681	0.0200980	0.6696079	1152886161	2942823661
13	683	0.1199796	0.0223777	0.0052190	0.0134849	0.0177127	0.5258692	1640457249	2944996283
13	684	0.0556839	0.0087574	0.0068928	0.0088295	0.0113076	0.4661374	965892638	2947702454
13	685	0.1086861	0.0189465	0.0107587	0.0166271	0.0194774	0.5533883	1472097387	2943467933
13	686	0.1215154	0.0150297	0.0087481	0.0185787	0.0161476	0.3981901	1518316742	2946248869
13	687	0.1094182	0.0272688	0.0032358	0.0060002	0.0209793	0.6359370	1616510929	2946874317
13	688	0.0932255	0.0207787	0.0042189	0.0156677	0.0129914	0.5640368	1349611374	2947990521
13	689	0.1495872	0.0179567	0.0053148	0.0123839	0.0193369	0.5116099	1594588816	2955572368
13	690	0.2507269	0.0209200	0.0056065	0.0622978	0.0173265	0.5188698	1172547529	2960669202
13	691	0.0318692	0.0159774	0.0159089	0.0158404	0.0342153	0.6375717	1794755459	296160262
13	692	0.1581916	0.0298206	0.0078896	0.0147663	0.0235852	0.6433603	161607346	2965748815
13	693	0.1809595	0.0361999	0.0081318	0.0242958	0.0217279	0.5448393	1544032995	2961972081
13	694	0.0668249	0.0132095	0.0122738	0.0145717	0.0160853	0.6228483	1739468421	2970915789
13	695	0.1584314	0.0208093	0.0055569	0.0176554	0.0143179	0.5053317	1075119149	2967306383
13	696	0.1528262	0.0227374	0.0079070	0.0167848	0.0234144	0.4822124	1316364821	2963153094
13	697	0.1633399	0.0185797	0.0050525	0.0149666	0.0222222	0.6062863	1374722846	2970868914
13	698	0.2566449	0.0382016	0.0107982	0.0202416	0.0190216	0.6987918	1581848485	2971779798
13	699	0.1246914	0.0249673	0.0083951	0.0250399	0.0189833	0.5318809	1497755556	2975262963
13	700	0.1930660	0.0288295	0.0130125	0.0295663	0.0226560	0.7410695	1632122727	2984624242
13	701	0.1270251	0.0273948	0.0075343	0.0167907	0.0148346	0.7269971	11009642	2992054893
13	702	0.1441490	0.0246754	0.0016474	0.0052288	0.0172442	0.5345331	1600981735	2986410959
13	703	0.2658762	0.0204294	0.0055491	0.0079826	0.0175618	0.5944819	1003418972	2989264822
13	704	0.0603581	0.0170503	0.0139944	0.0129451	0.0144403	0.5298971	1724923077	2985458194
13	705	0.2575272	0.0167072	0.0119268	0.0230919	0.0199644	0.4708637	1452752066	2995528926
13	706	0.0696977	0.0264406	0.0152924	0.0263036	0.0274681	0.4827297	2121943231	2991847162
13	707	0.0938771	0.0147881	0.0062071	0.0130799	0.0207867	0.6081880	1351813906	2992809816
13	708	0.1231996	0.0252674	0.0048574	0.0159537	0.0159447	0.5644296	1116343182	2995190909
13	709	0.1484669	0.0299776	0.0099487	0.0137518	0.0216278	0.7103632	1611629195	3002583893
13	710	0.0884752	0.0196244	0.0072475	0.0102424	0.0174071	0.5870605	176856962	3001257384
13	711	0.2080241	0.0187029	0.0059879	0.0111011	0.0199698	0.6624434	9960153846	3001.9
13	712	0.1819831	0.0347867	0.0113519	0.0401359	0.0274166	0.6456226	1513842105	3007410088
13	713	0.1593884	0.0241172	0.0045828	0.0139321	0.0174955	0.5758002	1172131148	3010557377
13	714	0.1838308	0.0351492	0.0112721	0.0266493	0.0340578	0.4240220	2173179803	3008901478
13	715	0.1533217	0.0198226	0.0135444	0.0267391	0.0210010	0.6576330	1639729264	3015482003
13	716	0.1952726	0.0152699	0.0106500	0.0264034	0.0237980	0.5795192	1599510274	3029681507
13	717	0.0823719	0.0192470	0.0130181	0.0208327	0.0185918	0.5799459	1290094431	3033171913
13	718	0.2566229	0.0275957	0.0147801	0.0365658	0.0271388	0.5284295	162618835	3027871845
13	719	0.0997761	0.0153367	0.0089792	0.0119832	0.0163526	0.5114752	1252270195	303264624
13	720	0.1765360	0.0205882	0.0058279	0.0164052	0.0166231	0.5251198	1180777778	3039752778
13	721	0.1205750	0.0258126	0.0072439	0.0142830	0.0152843	0.5754466	1160903288	3043077369
13	722	0.0574215	0.0175627	0.0087287	0.0318996	0.0167088	0.8080961	1648857527	3040607527
13	723	0.0958005	0.0255906	0.0070712	0.0146596	0.0155936	0.6343292	1273055118	3052588583
13	724	0.0821542	0.0166260	0.0052227	0.0106443	0.0188488	0.5432367	1774737327	3053207373
13	725	0.1232755	0.0247778	0.0086543	0.0280928	0.0184300	0.5194315	1042178058	3054516187
13	726	0.1304062	0.0220448	0.0076681	0.0191807	0.0153361	0.6107563	1142230357	3059539286
13	727	0.1569925	0.0334214	0.0094748	0.0338386	0.0201548	0.7686645	1634021277	3055817967
13	728	0.1292020	0.0233519	0.0089405	0.0279028	0.0168805	0.5988219	165091358	3057518519
13	729	0.1412145	0.0172055	0.0090775	0.0163699	0.0154014	0.6208897	1119990315	3062566586
13	730	0.0969002	0.0213812	0.0079945	0.0168973	0.0188365	0.5698025	1305694853	3064538603
13	731	0.0373529	0.0112745	0.0133193	0.0194818	0.0145098	0.5970728	1548775	3064875
13	732	0.0811804	0.0216533	0.0057846	0.0062927	0.0164680	0.5488112	1760554817	3067116279
13	733	0.1643944	0.0264175	0.0090607	0.0097685	0.0184045	0.3883910	1619191336	3065209386
13	734	0.1562642	0.0379314	0.0074691	0.0180492	0.0162287	0.6576764	1197950715	3063319555
13	735	0.0887351	0.0204152	0.0238178	0.0530181	0.0213956	0.4880431	1502504902	3068627451
13	736	0.1420954	0.0283272	0.0052412	0.0152375	0.0177699	0.6903564	1169115804	3068430518
13	737	0.0948165	0.0233482	0.0061477	0.0080955	0.0169611	0.6281046	1577782178	3070952145
13	738	0.2725189	0.0250176	0.0096129	0.0212871	0.0268175	0.6884062	1101679487	3071697436
13	739	0.2393359	0.0308016	0.0034708	0.0121403	0.0189167	0.6272256	1087022989	3078409962
13	740	0.1825052	0.0209023	0.0095660	0.0168761	0.0207405	0.6405578	1643395631	3081968447
13	741	0.1385091	0.0499321	0.0078151	0.0135055	0.0155552	0.6554916	1065568019	3080245823
13	742	0.1450980	0.0177804	0.0055514	0.0137996	0.0157752	0.5082827	1271143577	3076652393
13	743	0.1024889	0.0159112	0.0082343	0.0167425	0.0156374	0.5217838	1142416459	3083431421
13	744	0.1331411	0.0264642	0.0079136	0.0239651	0.0170511	0.6530437	1234065359	3089918301
13	745	0.1139765	0.0346795	0.0064148	0.0170454	0.0171579	0.5216898	1325673289	3087454746
13	746	0.1223039	0.0279645	0.0084034	0.0171335	0.0170285	0.6072362	1253252976	3088568452
13	747	0.1382996	0.0222526	0.0076193	0.0100817	0.0170957	0.6937529	103112685	3093761099
13	748	0.1348697	0.0187483	0.0077142	0.0161912	0.0202847	0.6304486	1302849315	3090427397
13	749	0.1576169	0.0294822	0.0106385	0.0109502	0.0205530	0.6067974	1663394872	3093458974
13	750	0.2661284	0.0191080	0.0044983	0.0173203	0.0233756	0.5836217	1465686275	3097107843
13	751	0.1134773	0.0206006	0.0103053	0.0190618	0.0165302	0.4519533	1098820253	3097718987
13	752	0.1541292	0.0209573	0.0089043	0.0116494	0.0184775	0.4929758	9982970588	3100970588
13	753	0.1333333	0.0160685	0.0101695	0.0245597	0.0213360	0.5593885	1046016949	3099432203
13	754	0.3396002	0.0359261	0.0173539	0.0392690	0.0301314	0.4956634	1486363107	3092829126
13	755	0.1409231	0.0395641	0.0048529	0.0122082	0.0185182	0.5202446	1163074313	3101886914
13	756	0.1410831	0.0291083	0.0041667	0.0113562	0.0150327	0.5394725	1076.75	3105196429
13	757	0.2618824	0.0194667	0.0036549	0.0154510	0.0173176	0.5532392	1449712	3105968
13	758	0.1846042	0.0425770	0.0069094	0.0133831	0.0178857	0.4793858	1594248677	3105164021
13	759	0.1657926	0.0332447	0.0077191	0.0163418	0.0192358	0.7617765	1187003012	3109766566
13	760	0.1412951	0.0225569	0.0143659	0.0142315	0.0324715	0.5376977	2323.5	3115866935
13	761	0.2100561	0.0236840	0.0079815	0.0164836	0.0202506	0.6462778	1662491701	3112541494
13	762	0.1312231	0.0153170	0.0140157	0.0579530	0.0207597	0.5918491	9800179372	3116343049
13	763	0.1655591	0.0357282	0.0073866	0.0175498	0.0153121	0.7034651	1098807252	3126828244
13	764	0.0991679	0.0282544	0.0123769	0.0080536	0.0195313	0.5816356	1628565854	3122439024
13	765	0.2547007	0.0265733	0.0064662	0.0193904	0.0215485	0.6359786	1225726899	3120556468
13	766	0.1454842	0.0193906	0.0095807	0.0190769	0.0170618	0.5546305	1036147692	3128292308
13	767	0.1548811	0.0234147	0.0068732	0.0157593	0.0169378	0.5046099	1072207447	3130632979
13	768	0.1642256	0.0291091	0.0064416	0.0150151	0.0206540	0.6130412	1177895973	3130595638
13	769	0.1386829	0.0143544	0.0084795	0.0791861	0.0224269	0.5602294	1342256604	3135658491
13	770	0.1785467	0.0161909	0.0053922	0.0143454	0.0170704	0.5017157	1275128676	3133551471
13	771	0.1441441	0.0241502	0.0108865	0.0170641	0.0219699	0.5128927	1692702703	3138239382
13	772	0.1675767	0.0285017	0.0039591	0.0143165	0.0185383	0.5329205	1255856459	3139325359
13	773	0.1131296	0.0205363	0.0136216	0.0234047	0.0178757	0.4678722	1454024735	3139681979
13	774	0.1315743	0.0253046	0.0025982	0.0075849	0.0151376	0.4976842	1411777778	3141238683
13	775	0.1492912	0.0309651	0.0074866	0.0079959	0.0278924	0.5666073	238538961	3144852814
13	776	0.2347181	0.0274142	0.0064338	0.0151838	0.0167034	0.6109681	1217071875	3141890625
13	777	0.1460259	0.0243775	0.0101917	0.0210213	0.0164546	0.6206444	1095955638	314454159
13	778	0.2089325	0.0674474	0.0061547	0.0192629	0.0208061	0.4683188	1232050926	3148657407
13	779	0.1308799	0.0186419	0.0105477	0.0116681	0.0205737	0.4964165	1621236453	3148275862
13	780	0.1616535	0.0531837	0.0048716	0.0175662	0.0169598	0.5884981	1120798969	3150412371
13	781	0.1249757	0.0255188	0.0046076	0.0168410	0.0176185	0.5419082	1297478134	3154781341
13	782	0.1589351	0.0523513	0.0191296	0.0156066	0.0223019	0.5506456	2785252033	3156191057
13	783	0.1273037	0.0268930	0.0112222	0.0233279	0.0183988	0.4080447	1195695652	3160897233
13	784	0.1778504	0.0136321	0.0067434	0.0074385	0.0172321	0.5710136	1680031746	3158148148
13	785	0.0959559	0.0292075	0.0134600	0.0195261	0.0186070	0.6064543	1697109375	3158989583
13	786	0.1132158	0.0179373	0.0027324	0.0124726	0.0147519	0.5097331	1051274368	3164530686
13	787	0.0968826	0.0358119	0.0130425	0.0398766	0.0193435	0.4723287	2003373596	3159126404
13	788	0.1248199	0.0201981	0.0049120	0.0143557	0.0165866	0.6041717	115382398	3169678571
13	789	0.1570868	0.0265406	0.0071429	0.0160504	0.0143838	0.4920588	1077960714	3171.95
13	790	0.0778898	0.0281233	0.0059384	0.0031186	0.0178338	0.4668721	2399157143	3169538095
13	791	0.1075096	0.0297554	0.0038508	0.0087932	0.0154841	0.4832323	1098324742	3173956186
13	792	0.1013715	0.0174743	0.0045515	0.0106675	0.0173931	0.4768465	123215544	3173404145
13	793	0.0971678	0.0318550	0.0110022	0.0195612	0.0153284	0.6326953	1065234127	3179837302
13	794	0.1128797	0.0193387	0.0067090	0.0122068	0.0153595	0.4954441	9989117647	3181367647
13	795	0.1261864	0.0214056	0.0020621	0.0093765	0.0173078	0.5827275	1305737079	3179665169
13	796	0.1723829	0.0367453	0.0052509	0.0129944	0.0178465	0.6211588	1182350282	3188048023
13	797	0.1036153	0.0314091	0.0209059	0.0402395	0.0281091	0.5823758	1891051282	3192783217
13	798	0.2021171	0.0254768	0.0081469	0.0219751	0.0191701	0.7148511	1209726651	3196687927
13	799	0.1259482	0.0231287	0.0050093	0.0110777	0.0116645	0.5951911	1075543796	3193945255
13	800	0.3211584	0.0168929	0.0060935	0.0190166	0.0229140	0.4817738	1691381538	3198673846
13	801	0.1412956	0.0241251	0.0067213	0.0146736	0.0193398	0.6349764	1152792405	320143038
13	802	0.1174859	0.0118184	0.0019205	0.0065539	0.0161966	0.5344883	1267441781	3193746575
13	803	0.2349304	0.0049494	0.0027672	0.0319892	0.0244782	0.3920304	136053629	3198342742
13	804	0.0995987	0.0243319	0.0055323	0.0138308	0.0128917	0.5346083	1127249637	3190323657
13	805	0.2458732	0.0096329	0.0094277	0.0375855	0.0252166	0.4450753	1632363372	3207456395
13	806	0.2066270	0.0294869	0.0126255	0.0243219	0.0188290	0.5558380	1100393728	3208686411
13	807	0.1551834	0.0255901	0.0054829	0.0122731	0.0154684	0.7757807	1193671296	3211738426
13	808	0.2179201	0.0277190	0.0075652	0.0189030	0.0255349	0.5852073	1667883544	3210837975
13	809	0.1462366	0.0305560	0.0026795	0.0161923	0.0188028	0.6256225	1544601173	3212753666
13	810	0.1305166	0.0229559	0.0063926	0.0140333	0.0180983	0.7032764	1245636559	3220898925
13	811	0.1037781	0.0391559	0.0151841	0.0360473	0.0250478	0.4922525	159502439	321217378
13	812	0.2627070	0.0426804	0.0110223	0.0091186	0.0220255	0.4737483	1702524272	3213932039
13	813	0.1619695	0.0178475	0.0061699	0.0104924	0.0151634	0.4459085	9980177778	3214191111
13	814	0.4107902	0.0317718	0.0067160	0.0180697	0.0161324	0.4493601	1083248503	3218164671
13	815	0.1251155	0.0198083	0.0062484	0.0144139	0.0149891	0.5203486	1216213333	3213937778
13	816	0.1569659	0.0123581	0.0034314	0.0126806	0.0172601	0.6894092	15291875	3218611842
13	817	0.1472340	0.0287025	0.0055152	0.0140259	0.0191406	0.6024948	1300976596	3216757447
13	818	0.1286953	0.0156259	0.0042006	0.0119834	0.0157391	0.6670890	1138496154	3223340385
13	819	0.1637731	0.0209404	0.0079098	0.0206073	0.0182086	0.7345422	1285512136	3221915049
13	820	0.1410855	0.0123444	0.0054675	0.0221540	0.0180733	0.6259278	1043162319	3224634783
13	821	0.1465058	0.0167756	0.0032177	0.0106083	0.0166080	0.5181163	1102440171	3232410256
13	822	0.1046200	0.0185138	0.0069006	0.0101153	0.0201128	0.4260035	1829742489	3235424893
13	823	0.2541510	0.0303504	0.0112432	0.0207968	0.0180017	0.3920317	1170691489	3240702128
13	824	0.1497043	0.0234568	0.0076149	0.0264032	0.0194626	0.5287271	1262867725	3237
13	825	0.1323159	0.0128414	0.0044056	0.0104312	0.0164370	0.6979701	1117748111	3237433249
13	826	0.2037126	0.0212203	0.0024286	0.0045387	0.0190107	0.6742112	1055030457	3239284264
13	827	0.1317323	0.0393686	0.0059183	0.0109462	0.0197877	0.5999101	1287883028	3245307339
13	828	0.0802713	0.0209911	0.0109455	0.0719715	0.0189901	0.4674322	1568520548	324519863
13	829	0.1534165	0.0175282	0.0072044	0.0121658	0.0162805	0.4164587	1186674242	3248015152
13	830	0.1124362	0.0266631	0.0098129	0.0549915	0.0198227	0.5801952	1509310502	3247908676
13	831	0.1402378	0.0225282	0.0051523	0.0182311	0.0182728	0.5574260	1530489362	3251515957
13	832	0.1941475	0.0197074	0.0048174	0.0102419	0.0176570	0.5799343	1208824873	3251314721
13	833	0.1852567	0.0192486	0.0079105	0.0175872	0.0179464	0.5531582	1242459924	3250362595
13	834	0.1375872	0.0151693	0.0076659	0.0076807	0.0181234	0.5629482	1789065913	3267969868
13	835	0.1317942	0.0188910	0.0134514	0.0100148	0.0257854	0.5810036	2614607527	3262758065
13	836	0.0933865	0.0168827	0.0090111	0.0076627	0.0205574	0.4416655	2577496368	3272450363
13	837	0.0982724	0.0090938	0.0018654	0.0065501	0.0150291	0.4505353	1466216216	3266810811
13	838	0.1460951	0.0251246	0.0032968	0.0127883	0.0174676	0.5820671	1241250847	3274308475
13	839	0.0680053	0.0044495	0.0014894	0.0016968	0.0130091	0.4938914	1434673077	32765625
13	840	0.2074015	0.0147147	0.0020668	0.0090620	0.0166402	0.4985868	1133297297	327413964
13	841	0.2515837	0.0209653	0.0059578	0.0158748	0.0234666	0.5340372	1551391026	3279451923
13	842	0.1292021	0.0180350	0.0076754	0.0150467	0.0151935	0.5215372	1209315508	3277748663
13	843	0.1054085	0.0189626	0.0055749	0.0248601	0.0159383	0.5477595	1187529563	3281526992
13	844	0.1227896	0.0131724	0.0052862	0.0074122	0.0143647	0.5300151	1508915751	3285805861
13	845	0.1426953	0.0135076	0.0033489	0.0074323	0.0159477	0.5847744	1111790476	3293203175
13	846	0.1238546	0.0121282	0.0061980	0.0191966	0.0170253	0.5633860	1437836585	3298134146
13	847	0.1748089	0.0218013	0.0076659	0.0141354	0.0200953	0.5417525	1266553672	3301977401
13	848	0.1632331	0.0192352	0.0101854	0.0157927	0.0270429	0.5831071	7526063348	3317986425
13	849	0.1649895	0.0345406	0.0076892	0.0191379	0.0213742	0.6049425	1571768595	3316654959
13	850	0.1439936	0.0312484	0.0075453	0.0189005	0.0152271	0.4860387	1119439873	3315610759
13	851	0.1310790	0.0138016	0.0066326	0.0115907	0.0195644	0.5448733	141516451	3319373383
13	852	0.1012333	0.0160471	0.0089965	0.0170230	0.0173779	0.5680301	1444095023	3321612368
13	853	0.1105801	0.0264910	0.0047386	0.0078023	0.0179330	0.5231618	1621036458	3326541667
13	854	0.2259332	0.0431527	0.0099542	0.0433068	0.0207866	0.6042606	1200267191	3327398821
13	855	0.1150199	0.0225035	0.0101347	0.0140659	0.0181696	0.6679803	1465728606	3326085575
13	856	0.1096201	0.0197815	0.0121732	0.0228758	0.0172590	0.6203023	14863125	3328242188
13	857	0.1501719	0.0129914	0.0092556	0.0139021	0.0173590	0.4079732	1602758294	3330985782
13	858	0.1226833	0.0192184	0.0059898	0.0091861	0.0174590	0.3847838	1275171233	3334958904
13	859	0.1392428	0.0170876	0.0111021	0.0204226	0.0183260	0.5769920	1238540166	3339213296
13	860	0.1269020	0.0160362	0.0079276	0.0122474	0.0185943	0.6286335	1550732308	3341618462
13	861	0.1913537	0.0078904	0.0033388	0.0063627	0.0176864	0.4752028	7816506024	3343188755
13	862	0.1558863	0.0240294	0.0090930	0.0229279	0.0160612	0.6738067	1397930279	3341428287
13	863	0.0903241	0.0184474	0.0060024	0.0124450	0.0161265	0.6764066	1438708163	3346414286
13	864	0.1177536	0.0127451	0.0057758	0.0096974	0.0190963	0.5783674	2194016304	3346842391
13	865	0.1703617	0.0334692	0.0116223	0.0146250	0.0164758	0.5670744	1457	3351673267
13	866	0.1060566	0.0174118	0.0076166	0.0155643	0.0253595	0.5345185	2208693333	3350257778
13	867	0.2720588	0.0098448	0.0111792	0.0174973	0.0176198	0.4834423	1517159722	3355881944
13	868	0.2389943	0.0136464	0.0078906	0.0150854	0.0199715	0.5034472	1536717742	3354189516
13	869	0.1044548	0.0291022	0.0147059	0.0221706	0.0228242	0.5432749	2097057018	335647807
13	870	0.1229583	0.0183831	0.0084202	0.0135312	0.0167579	0.6202556	1052747748	3363246246
13	871	0.2075989	0.0403827	0.0141258	0.0141394	0.0319289	0.4224303	1733380623	3359965398
13	872	0.0997907	0.0323425	0.0099644	0.0176959	0.0183030	0.5800642	137294484	3367154804
13	873	0.1542225	0.0119783	0.0068336	0.0206368	0.0164434	0.5296059	1281821782	3371579208
13	874	0.1350350	0.0189600	0.0076617	0.0181308	0.0184763	0.4976678	1411744493	337169163
13	875	0.1460876	0.0079897	0.0075683	0.0152098	0.0164743	0.6171340	1309009346	3373775701
13	876	0.1448091	0.0153767	0.0030753	0.0152322	0.0111455	0.5407018	1511631579	3376115789
13	877	0.1733618	0.0135934	0.0069288	0.0132277	0.0175759	0.5159403	1064321244	3374870466
13	878	0.0853593	0.0139359	0.0062799	0.0107492	0.0131142	0.5323246	1173303237	3378488927
13	879	0.1303248	0.0078581	0.0070498	0.0161054	0.0154318	0.5946116	1328958015	3377492366
13	880	0.1264129	0.0357401	0.0066128	0.0112726	0.0192849	0.4885506	1229945098	3384282353
13	881	0.0998907	0.0195787	0.0089657	0.0133100	0.0205117	0.5459727	142467658	3386516729
13	882	0.0797654	0.0178239	0.0050466	0.0099325	0.0149952	0.6252973	1450172131	3386383197
13	883	0.1924106	0.0114313	0.0140843	0.0114240	0.0232395	0.5776376	180703512	3387696858
13	884	0.1026439	0.0242547	0.0117900	0.0201729	0.0155682	0.6768459	1404969892	3395855914
13	885	0.1167359	0.0123811	0.0067176	0.0120238	0.0171513	0.6245656	1104487472	3396330296
13	886	0.0975375	0.0144371	0.0113961	0.1256950	0.0241745	0.4804894	1759712794	3393796345
13	887	0.1436813	0.0243400	0.0080476	0.0173586	0.0150728	0.4806222	1208139665	3397990689
13	888	0.1099699	0.0150050	0.0055112	0.0105856	0.0141054	0.5150880	1125002227	3403106904
13	889	0.1331933	0.0328531	0.0167067	0.0369348	0.0193878	0.4498399	1424183673	3403622449
13	890	0.1482552	0.0077434	0.0040379	0.0140246	0.0168328	0.5918245	123115678	3414305085
13	891	0.1761765	0.0239869	0.0070833	0.0170425	0.0164951	0.6704657	1160945833	3410935417
13	892	0.2367134	0.0212138	0.0102334	0.0172923	0.0169935	0.5389729	1175766667	3417095238
13	893	0.1529573	0.0194793	0.0066056	0.0144166	0.0171006	0.5789778	121477459	3420893443
13	894	0.1808166	0.0182667	0.0062304	0.0185383	0.0211018	0.5537391	1347757576	3424419913
13	895	0.2167558	0.0130570	0.0096257	0.0297534	0.0219251	0.5572935	1543632576	3425325758
13	896	0.0691493	0.0119070	0.0111480	0.0206040	0.0165085	0.3967742	1383141129	3430806452
13	897	0.1142544	0.0147833	0.0081785	0.0130805	0.0162281	0.4960784	1136601974	3428796053
13	898	0.1728631	0.0133349	0.0070849	0.0149357	0.0179611	0.5842984	1310427734	3434763672
13	899	0.1992770	0.0198927	0.0084128	0.0148099	0.0225326	0.4652646	1349069832	3442586592
13	900	0.1885382	0.0216005	0.0179340	0.0220947	0.0174717	0.5263032	8865081301	3446955285
13	901	0.1400183	0.0226963	0.0060347	0.0140404	0.0133597	0.5420400	9182668394	3442795337
13	902	0.0994786	0.0075825	0.0054063	0.0100986	0.0123087	0.5243908	8507369942	3447112717
13	903	0.3769348	0.0120823	0.0071224	0.0176776	0.0182274	0.5352636	1290660436	3457205607
13	904	0.0709912	0.0084334	0.0060668	0.0116228	0.0155274	0.5015068	1348342981	3466018813
13	905	0.0599048	0.0151214	0.0074558	0.0105382	0.0156701	0.4536755	1448790123	3466440329
13	906	0.1508533	0.0104303	0.0055919	0.0130719	0.0181826	0.5469317	131587963	3475641204
13	907	0.0724844	0.0184874	0.0116527	0.0117475	0.0203060	0.5944753	1877101099	3483327473
13	908	0.1661870	0.0177356	0.0062503	0.0154720	0.0147641	0.6259886	1150769596	3481897862
13	909	0.0745396	0.0165511	0.0167002	0.0132856	0.0246925	0.4667263	1523604563	3483775665
13	910	0.1015191	0.0258382	0.0093422	0.0167771	0.0188583	0.4874456	1498726962	3493141638
13	911	0.0945534	0.0119009	0.0168845	0.0230528	0.0243736	0.5287309	1840670139	3488850694
13	912	0.1017005	0.0252299	0.0066805	0.0190526	0.0187923	0.4033316	1542637168	3496256637
13	913	0.1917874	0.0100313	0.0087241	0.0124467	0.0173629	0.4567917	1102507246	3503
13	914	0.0710645	0.0070969	0.0090974	0.0208462	0.0171469	0.5681988	1081190283	3504753036
13	915	0.2415330	0.0179838	0.0055060	0.0089127	0.0196871	0.4745692	1192166667	3504681818
13	916	0.0673376	0.0075237	0.0054471	0.0079070	0.0151991	0.6039296	1323570265	3509173116
13	917	0.0656810	0.0063123	0.0105274	0.0065849	0.0179092	0.4167558	1477427807	3515219251
13	918	0.1493860	0.0303684	0.0163376	0.0232987	0.0404776	0.4032024	1427882353	3518868512
13	919	0.1187562	0.0205717	0.0125305	0.0153958	0.0278471	0.5292929	1890380471	3517811448
13	920	0.2192412	0.0245626	0.0179415	0.0153086	0.0332611	0.5278343	1835546742	3527014164
13	921	0.1484069	0.0140012	0.0103962	0.0161458	0.0193117	0.3790237	1451421875	3518450521
13	922	0.1319469	0.0205288	0.0107744	0.0119925	0.0211032	0.5488810	1487583333	3543853535
13	923	0.0580326	0.0118471	0.0092437	0.0087164	0.0164113	0.5177295	1515798319	3549563025
13	924	0.1145447	0.0192244	0.0180218	0.1206623	0.0306057	0.4318431	1595457778	3552248889
13	925	0.0743479	0.0078663	0.0087801	0.0106310	0.0205564	0.4691769	1831141593	3556778761
13	926	0.2737861	0.0264411	0.0063284	0.0115459	0.0183960	0.5090970	1223257511	3565635193
13	927	0.1509043	0.0132290	0.0062049	0.0111921	0.0162154	0.6481244	1148451017	3574325323
13	928	0.0831050	0.0177097	0.0061778	0.0038858	0.0168144	0.5399230	1449328767	3573872146
13	929	0.1228590	0.0187663	0.0086117	0.0127914	0.0187719	0.6216612	151116166	3582178827
13	930	0.2112953	0.0150503	0.0064350	0.0138693	0.0159891	0.4791884	1103710425	3584050193
13	931	0.0735451	0.0108630	0.0091433	0.0061025	0.0205935	0.4284995	1924475936	3593074866
13	932	0.0893570	0.0140765	0.0096070	0.0058567	0.0199846	0.4956931	1607048035	3594327511
13	933	0.1724882	0.0132746	0.0082485	0.0128895	0.0162031	0.4801236	1192413437	3594157623
13	934	0.1683078	0.0090153	0.0087170	0.0161765	0.0192029	0.4234229	1153391304	3600880435
13	935	0.0869875	0.0205031	0.0111547	0.0088017	0.0211052	0.5885364	1527844444	3604230303
13	936	0.1209269	0.0248574	0.0060071	0.0072816	0.0186007	0.5981016	1220845455	3606515909
13	937	0.1117867	0.0145994	0.0128222	0.0188000	0.0279210	0.5857091	1569018727	3608157303
13	938	0.1192636	0.0120491	0.0134112	0.0152971	0.0196078	0.5754528	1555312977	3611694656
13	939	0.1330660	0.0156764	0.0094276	0.0232620	0.0171618	0.5797485	1167762626	361419697
13	940	0.3200989	0.0267876	0.0098137	0.0179170	0.0261308	0.6380906	1509477612	3612943615
13	941	0.1222594	0.0128381	0.0074499	0.0135289	0.0152931	0.4995802	111601626	3619466125
13	942	0.0992660	0.0151830	0.0102129	0.0143756	0.0201111	0.5749502	1544566845	363647861
13	943	0.2141418	0.0301773	0.0089041	0.0181037	0.0184932	0.6147059	112844863	3637445205
13	944	0.1028363	0.0265755	0.0157410	0.0140264	0.0326129	0.4580210	1847539535	3649813953
13	945	0.1737919	0.0156113	0.0033751	0.0066645	0.0162327	0.5724847	1114830601	3653827869
13	946	0.1656595	0.0338048	0.0224687	0.0154827	0.0234437	0.5097611	2347027322	3652784153
13	947	0.1134258	0.0086248	0.0043385	0.0046121	0.0160641	0.4941958	1553328904	3656890365
13	948	0.1010702	0.0188896	0.0087338	0.0120664	0.0233283	0.4682181	1627150183	3667212454
13	949	0.1496160	0.0096142	0.0072648	0.0129755	0.0138430	0.4046625	1106612903	3673023041
13	950	0.0756148	0.0152530	0.0094464	0.0116130	0.0157729	0.4641101	1513270718	3709569061
13	951	0.2438032	0.0065668	0.0088975	0.0410470	0.0199778	0.4731595	1258514151	3711122642
13	952	0.0585705	0.0123087	0.0101328	0.0081214	0.0166097	0.5859077	127286129	3729125806
13	953	0.0805654	0.0074054	0.0020976	0.0057273	0.0150661	0.3996899	1437376744	377415814
13	954	0.2234993	0.0414222	0.0130184	0.0186651	0.0381225	0.5111178	1919723785	3822964194
13	955	0.0841521	0.0070279	0.0029798	0.0011385	0.0142245	0.6129876	1353344086	3855491039
13	956	0.1560735	0.0148970	0.0029495	0.0131688	0.0175474	0.5592556	1457938559	3922631356
13	957	0.0768057	0.0148920	0.0110573	0.0165674	0.0176595	0.5178705	1790313291	396610443
13	958	0.0622969	0.0080486	0.0058077	0.0121569	0.0140616	0.5009897	1812390476	397867619
13	959	0.0752491	0.0090485	0.0052073	0.0028930	0.0149630	0.4335905	1979168033	4034413934
14	1	0.2574874	0.0123547	0.0066111	0.0158945	0.0224536	0.5462433	2699.5	1546159292
14	2	0.0841245	0.0141039	0.0018920	0.0018576	0.0189198	0.4950292	1600701754	1751144737
14	3	0.1361912	0.0186194	0.0079613	0.0162665	0.0176847	0.6254633	1549986301	1770939726
14	4	0.2304498	0.0171857	0.0058535	0.0217561	0.0218426	0.5276817	1900893382	1773794118
14	5	0.1230488	0.0222477	0.0113375	0.0144198	0.0169070	0.5777066	168129572	1774568093
14	6	0.0700325	0.0079384	0.0006827	0.0010320	0.0138128	0.4325474	125548583	1776465587
14	7	0.0690786	0.0089884	0.0039476	0.0052230	0.0147666	0.4083637	1233139381	1799929204
14	8	0.1203722	0.0064916	0.0007090	0.1198405	0.0204941	0.4196965	1281231638	1795841808
14	9	0.1147898	0.0242770	0.0003484	0.0011340	0.0237448	0.5541512	1290966074	1825662359
14	10	0.4325626	0.0172844	0.0072538	0.0143942	0.0301371	0.4791341	2469560694	182083237
14	11	0.1642053	0.0083605	0.0022528	0.0031873	0.0209762	0.3506884	1188114894	1826578723
14	12	0.2505761	0.0184758	0.0037396	0.0130584	0.0243043	0.4573479	1238472509	1836723368
14	13	0.1821330	0.0335626	0.0064392	0.0043802	0.0245683	0.5994197	1258069212	1867976134
14	14	0.4053800	0.0187652	0.0057905	0.0139902	0.0305083	0.5495922	1276793388	1869344353
14	15	0.1600311	0.0124015	0.0027179	0.0078509	0.0224811	0.4662396	1199207921	1869833663
14	16	0.1697193	0.0372388	0.0074749	0.0178764	0.0259844	0.5617793	1225449753	1865802306
14	17	0.1682294	0.0190928	0.0074802	0.0244776	0.0225812	0.5313667	1294877612	1888077612
14	18	0.2446926	0.0424152	0.0077543	0.0334611	0.0264511	0.4919736	1273368272	1890203966
14	19	0.1099449	0.0123606	0.0073241	0.0220556	0.0183583	0.5761822	129870098	1909.75
14	20	0.1915468	0.0269281	0.0087582	0.0086928	0.0267756	0.4044227	1216922222	1912005556
14	21	0.2772225	0.0334070	0.0128557	0.0213033	0.0239717	0.4470736	1254988722	1912924812
14	22	0.1594409	0.0443621	0.0067170	0.0202302	0.0271448	0.4353534	1235141058	1916869018
14	23	0.1421674	0.0138520	0.0074215	0.0158128	0.0173308	0.5138520	1640134409	1921768817
14	24	0.1619515	0.0432423	0.0124883	0.0243114	0.0232260	0.4329832	1266479167	1920946429
14	25	0.1721749	0.0171274	0.0325227	0.1062704	0.0368738	0.3903554	206955477	1932434629
14	26	0.1158638	0.0218591	0.0072541	0.0213669	0.0212862	0.6401598	1310037037	193541358
14	27	0.1987522	0.0317858	0.0094069	0.0269405	0.0231648	0.6524226	1242719008	1940809917
14	28	0.1450330	0.0207794	0.0104955	0.0275161	0.0198845	0.5355138	1196423237	1944966805
14	29	0.2622734	0.0255913	0.0084091	0.0392561	0.0263864	0.5280103	1222316151	1947350515
14	30	0.0838850	0.0111322	0.0045822	0.0148570	0.0175838	0.4553658	9842508961	1960451613
14	31	0.2856055	0.0209530	0.0091669	0.0257002	0.0281769	0.5239956	1220702359	1970653358
14	32	0.1121590	0.0138149	0.0066130	0.0134364	0.0182306	0.4458287	1057008043	1963168901
14	33	0.1526232	0.0287140	0.0059442	0.0290673	0.0249868	0.5578696	1310301802	1968759009
14	34	0.0774338	0.0174579	0.0077399	0.0132783	0.0150671	0.3830409	1012328947	1975600877
14	35	0.1053911	0.0203871	0.0054546	0.0133740	0.0163130	0.5629272	1121131749	1979015119
14	36	0.1506509	0.0266515	0.0091665	0.0173932	0.0225733	0.7858748	1158504132	1984946281
14	37	0.3955101	0.0533106	0.0163115	0.0320318	0.0424552	0.5233305	1260284058	1984118841
14	38	0.2416773	0.0354352	0.0091127	0.0280223	0.0353435	0.5725843	1276510791	1983816547
14	39	0.1003667	0.0164571	0.0043931	0.0133962	0.0185751	0.5247867	1178652672	1990946565
14	40	0.2168498	0.0084895	0.0121741	0.0235510	0.0237880	0.4468434	2026010989	1992549451
14	41	0.1193078	0.0180804	0.0044671	0.0128072	0.0171955	0.7114101	1128777434	1996250386
14	42	0.0335707	0.0162490	0.0094082	0.0075090	0.0166711	0.4417832	192461435	2000609865
14	43	0.0907206	0.0179093	0.0047708	0.0130761	0.0249157	0.6284626	110433121	1999611465
14	44	0.2766734	0.0516258	0.0104432	0.0246051	0.0309669	0.5064663	1282227273	201065047
14	45	0.0937811	0.0118964	0.0058677	0.0121598	0.0153205	0.4621891	105241791	201205597
14	46	0.1204338	0.0224702	0.0068218	0.0325452	0.0218902	0.4700713	1350508039	2015900322
14	47	0.1363499	0.0230446	0.0067335	0.0147059	0.0178194	0.4433635	9990934066	2020263736
14	48	0.1392544	0.0330495	0.0180083	0.0231682	0.0219298	0.4862745	1174.5	2020111842
14	49	0.1337363	0.0257305	0.0108037	0.0178408	0.0212586	0.6772224	1151215415	2011144269
14	50	0.1101619	0.0116996	0.0084615	0.0140753	0.0191685	0.4574730	1134165975	2019431535
14	51	0.0758442	0.0147695	0.0047874	0.0057347	0.0163484	0.5768984	1582935065	2019179221
14	52	0.0891068	0.0176471	0.0138736	0.0177952	0.0175948	0.4832157	1400848889	2023002222
14	53	0.3451272	0.0357078	0.0116423	0.0574134	0.0346590	0.5561985	1328059435	2027539376
14	54	0.2037540	0.0115133	0.0082453	0.0207474	0.0235629	0.4163231	1202833333	2033188034
14	55	0.1004051	0.0177119	0.0078431	0.0152649	0.0172419	0.4323935	1083677686	2035900826
14	56	0.1315086	0.0141222	0.0110393	0.0213419	0.0205372	0.5747818	1178135838	2036234104
14	57	0.1019855	0.0259095	0.0065483	0.0198052	0.0226045	0.5954372	1057050314	2041147799
14	58	0.1073698	0.0118154	0.0030088	0.0121535	0.0149256	0.4053077	1410452586	2042426724
14	59	0.1149873	0.0243464	0.0076434	0.0223312	0.0192175	0.4506536	1037493056	2051127315
14	60	0.0839840	0.0148707	0.0040864	0.0160767	0.0169183	0.4625195	9457367257	2053225664
14	61	0.1470454	0.0274308	0.0101678	0.0252948	0.0249646	0.6606563	1116798969	2056790378
14	62	0.2343100	0.0363834	0.0162948	0.0314477	0.0343475	0.5901660	1339636015	2055157088
14	63	0.1428898	0.0278698	0.0158513	0.0138334	0.0258900	0.5274954	1286857605	2058087379
14	64	0.1524991	0.0201154	0.0066888	0.0236277	0.0249949	0.5243686	1017697286	2061427975
14	65	0.1542972	0.0212938	0.0061328	0.0177081	0.0203958	0.6104942	1056417445	2064415888
14	66	0.1270418	0.0275021	0.0150213	0.0150554	0.0259847	0.5250639	1204856522	2061226087
14	67	0.1681622	0.0132935	0.0081312	0.0157306	0.0210701	0.4576271	1160954802	2061627119
14	68	0.0959874	0.0197899	0.0077770	0.0203855	0.0186150	0.4930752	1094586498	2070607595
14	69	0.1030606	0.0322842	0.0046017	0.0220245	0.0227191	0.4993561	1019767528	2077335793
14	70	0.1044368	0.0157324	0.0091196	0.0190696	0.0189619	0.4524106	1099784314	2080584314
14	71	0.1464129	0.0234371	0.0116840	0.0211765	0.0230681	0.5172434	1208661765	2086844118
14	72	0.0904412	0.0116071	0.0088060	0.0186975	0.0213761	0.5327731	1171580357	2089098214
14	73	0.1023137	0.0189804	0.0064706	0.0136993	0.0180065	0.6247320	1049546667	2088625
14	74	0.1052876	0.0217266	0.0056686	0.0224329	0.0206858	0.3573274	1111635071	2095274882
14	75	0.0992959	0.0108331	0.0077565	0.0181345	0.0202037	0.5395732	1307497238	210119337
14	76	0.1056741	0.0176991	0.0104807	0.0232749	0.0189832	0.6039447	1084117994	2098123894
14	77	0.5180002	0.0216151	0.0161323	0.0166713	0.0234737	0.4504600	1221170616	2101900474
14	78	0.1129079	0.0164484	0.0138433	0.0424583	0.0246518	0.4860528	9207137809	2103286219
14	79	0.1170972	0.0383339	0.0062247	0.0257599	0.0192966	0.5574541	1056526455	2105854497
14	80	0.0743444	0.0198677	0.0083392	0.0162296	0.0154618	0.5901016	1073231928	2104614458
14	81	0.1925332	0.0217865	0.0253714	0.0218459	0.0250545	0.4675976	1177106061	2107580808
14	82	0.1009623	0.0055278	0.0021851	0.0119239	0.0150930	0.4148904	8912915129	2111143911
14	83	0.1360492	0.0122089	0.0052414	0.0163081	0.0173234	0.4656387	9693398058	2111763754
14	84	0.1301525	0.0162092	0.0095207	0.0206100	0.0181264	0.3841830	1031522222	2110355556
14	85	0.0893377	0.0107044	0.0109063	0.0156358	0.0218800	0.4439451	1206635193	2112012876
14	86	0.0951926	0.0273116	0.0124614	0.0311337	0.0201055	0.4626655	1072187817	2129715736
14	87	0.0838670	0.0239265	0.0035493	0.0268677	0.0189625	0.5768181	1007098101	2131313291
14	88	0.2142138	0.0196529	0.0058448	0.0223124	0.0226730	0.4837653	1163957854	2136264368
14	89	0.0685688	0.0144746	0.0048336	0.0058758	0.0166634	0.4840206	1497700997	213748505
14	90	0.1125892	0.0269382	0.0152539	0.0108597	0.0193866	0.3881750	8636128205	2134258974
14	91	0.1901310	0.0325157	0.0059619	0.0377686	0.0219087	0.5681789	1043833948	2141690037
14	92	0.0984139	0.0281467	0.0060283	0.0400866	0.0229893	0.5574028	1104094293	2131631514
14	93	0.0782213	0.0174107	0.0142770	0.0105130	0.0177959	0.5460172	1633060268	2154555804
14	94	0.1624599	0.0482709	0.0087522	0.0508378	0.0209091	0.4108913	1010077273	2152659091
14	95	0.1073062	0.0208748	0.0086154	0.0213213	0.0206697	0.6392760	1227098462	2153461538
14	96	0.1305694	0.0217795	0.0064342	0.0219590	0.0192040	0.6109840	1307597254	215575286
14	97	0.0860005	0.0190314	0.0066052	0.0136735	0.0212143	0.5126294	1268674699	2169142169
14	98	0.1089294	0.0283186	0.0074674	0.0257976	0.0236524	0.5672542	1082648084	2161667247
14	99	0.1223407	0.0238275	0.0044337	0.0184994	0.0176203	0.6114895	119048538	2172296296
14	100	0.1208875	0.0289852	0.0090058	0.0155143	0.0204816	0.6706983	1339014035	2164724561
14	101	0.1489518	0.0103399	0.0054278	0.0164055	0.0153877	0.5119615	9579619377	2169785467
14	102	0.1738360	0.0249224	0.0114770	0.0213339	0.0228329	0.4578242	1009528958	2169814672
14	103	0.0860104	0.0235904	0.0027024	0.0224322	0.0183176	0.4968709	9760803109	2179111399
14	104	0.1319917	0.0247936	0.0091331	0.0192208	0.0220072	0.4553793	1312888158	2176325658
14	105	0.0832045	0.0101772	0.0048363	0.0321926	0.0185039	0.5326710	9327533512	2180238606
14	106	0.2037842	0.0226139	0.0037995	0.0616159	0.0183566	0.5808499	1069124514	2178054475
14	107	0.2704199	0.0192039	0.0016662	0.0121686	0.0334259	0.5605487	1618472103	2182137339
14	108	0.1483687	0.0202425	0.0066553	0.0275649	0.0194777	0.4804979	1001941909	2180369295
14	109	0.1069223	0.0253085	0.0108626	0.0161498	0.0183424	0.4925515	1141514377	2181233227
14	110	0.1009578	0.0339502	0.0062685	0.0222055	0.0193270	0.5922171	1120327366	2182905371
14	111	0.1235011	0.0257450	0.0110781	0.0269555	0.0254336	0.5617541	1433911552	2182268953
14	112	0.1309279	0.0261972	0.0078286	0.0169109	0.0190393	0.3701728	133527881	2189732342
14	113	0.1308368	0.0380558	0.0068268	0.0530572	0.0219718	0.5543441	1085061972	2192030986
14	114	0.1467835	0.0083771	0.0069253	0.0294034	0.0187401	0.5051815	9292255319	2193093617
14	115	0.1234369	0.0291343	0.0100629	0.0161117	0.0201073	0.5067703	1273509434	2198014151
14	116	0.0861411	0.0142901	0.0053588	0.0227081	0.0156041	0.4053588	1160353403	2205853403
14	117	0.1263431	0.0209608	0.0085686	0.0200490	0.0186373	0.5299314	1193.94	2205.25
14	118	0.1145313	0.0082622	0.0068977	0.0116895	0.0171904	0.4541714	838109589	2205638356
14	119	0.0531969	0.0108554	0.0030312	0.0056834	0.0141896	0.5247892	1685439614	2206830918
14	120	0.1130798	0.0226179	0.0048996	0.0226843	0.0185539	0.4025163	9622857143	2212455206
14	121	0.1180261	0.0260105	0.0090286	0.0206141	0.0202075	0.6113857	1123792619	2215453427
14	122	0.0856240	0.0301645	0.0089954	0.0277112	0.0194963	0.5756342	995563981	2215118483
14	123	0.0954729	0.0199539	0.0126298	0.0242070	0.0250865	0.5879470	1262573529	2214088235
14	124	0.1673797	0.0056097	0.0035126	0.0112299	0.0177834	0.5485687	8228208556	2216834225
14	125	0.1031484	0.0209236	0.0093297	0.0183263	0.0183348	0.6641292	1080603486	2216509804
14	126	0.1571831	0.0268492	0.0067268	0.0359154	0.0192778	0.5712386	1051096535	222384901
14	127	0.1209229	0.0257038	0.0082704	0.0223995	0.0214309	0.4444476	1312738499	2214476998
14	128	0.0309389	0.0191554	0.0135747	0.0065422	0.0211538	0.5149321	1524163462	2220125
14	129	0.0709236	0.0144008	0.0217223	0.0099856	0.0163011	0.5267384	1582790974	222263658
14	130	0.0964076	0.0174495	0.0049921	0.0299241	0.0163275	0.5903592	9155153285	2229710949
14	131	0.2018407	0.0209017	0.0097772	0.0154462	0.0203015	0.4246499	1421751701	2223986395
14	132	0.0597057	0.0182984	0.0070230	0.0097384	0.0164168	0.5372687	1655639719	2229036907
14	133	0.1996514	0.0143355	0.0022948	0.0277996	0.0176471	0.4425127	8720222222	2229885185
14	134	0.1047112	0.0295981	0.0057848	0.0194481	0.0219413	0.5149144	1166941176	2230303167
14	135	0.1329912	0.0214268	0.0126575	0.0562870	0.0193075	0.5345766	1219076596	2231908511
14	136	0.1736089	0.0274799	0.0064942	0.0241942	0.0195019	0.5027991	1002378378	2237179361
14	137	0.1367189	0.0337666	0.0057618	0.0251373	0.0184376	0.5856090	1077316629	2246166287
14	138	0.1530677	0.0385621	0.0050179	0.0297491	0.0222644	0.3796542	1094241935	2241080645
14	139	0.2734754	0.0297977	0.0065771	0.0212444	0.0238382	0.5914003	1158035433	2247019685
14	140	0.1091375	0.0361143	0.0053697	0.0274125	0.0243112	0.5456748	105324183	2249313725
14	141	0.0889493	0.0275927	0.0058257	0.0298425	0.0173014	0.5849088	9336300578	2249281792
14	142	0.1387809	0.0344245	0.0090409	0.0264665	0.0194766	0.4245795	111709205	2257728033
14	143	0.1090128	0.0318020	0.0094931	0.0261626	0.0206589	0.5690230	1310997118	2256253602
14	144	0.1317746	0.0240627	0.0056526	0.0253261	0.0192305	0.4578965	1100732218	2266054393
14	145	0.1902958	0.0281600	0.0110705	0.0251246	0.0222518	0.5534212	1279836158	2264205273
14	146	0.1443952	0.0321569	0.0063458	0.0317494	0.0197810	0.5736491	1074820779	2271.4
14	147	0.1457846	0.0431561	0.0093290	0.0218272	0.0220153	0.5335967	123640048	2272143885
14	148	0.2117647	0.0087418	0.0045343	0.0183211	0.0234886	0.4845384	876484375	2274854167
14	149	0.0970515	0.0354415	0.0065310	0.0690845	0.0206546	0.5055285	9611842105	2276244361
14	150	0.1315965	0.0467639	0.0123874	0.0178819	0.0287509	0.5202578	1190679666	2283011142
14	151	0.1278892	0.0438874	0.0054219	0.0461824	0.0201946	0.5334596	1027090909	2294056818
14	152	0.1373872	0.0200650	0.0039216	0.0167449	0.0168170	0.5770360	1513711656	2292411043
14	153	0.1051758	0.0307543	0.0121887	0.0220986	0.0211977	0.6409645	1235463964	2292234234
14	154	0.1194771	0.0211512	0.0090744	0.0184019	0.0230318	0.6435674	1125602151	2290698925
14	155	0.1281227	0.0258533	0.0074346	0.0316903	0.0219953	0.6927832	1112.5	2299819444
14	156	0.1381450	0.0227038	0.0064499	0.0121388	0.0204979	0.4920150	1415759868	2304289474
14	157	0.1183315	0.0249168	0.0096097	0.0285609	0.0231132	0.7316593	1206287736	2303832547
14	158	0.1277883	0.0225806	0.0069365	0.0176049	0.0224752	0.6131141	1241790323	2307037634
14	159	0.0951611	0.0247563	0.0270497	0.1683752	0.0195505	0.5068456	9580701754	2312312865
14	160	0.1416518	0.0256901	0.0087938	0.0094096	0.0195430	0.4170799	137931405	2309931129
14	161	0.1040501	0.0265237	0.0087816	0.0338305	0.0198201	0.5789397	1189703704	2307031339
14	162	0.0489122	0.0231937	0.0087295	0.0168815	0.0340048	0.5781091	1499541096	2313071918
14	163	0.1343993	0.0406632	0.0116726	0.0384787	0.0238189	0.6877089	1093728188	2315687919
14	164	0.1111645	0.0184794	0.0052021	0.0166547	0.0157263	0.5485714	9318367347	2318177551
14	165	0.1193583	0.0232086	0.0089661	0.0261497	0.0226738	0.4438503	1227581818	2318554545
14	166	0.1436433	0.0242673	0.0071895	0.0219481	0.0179211	0.3653173	1279043011	2321397849
14	167	0.1395403	0.0605931	0.0089369	0.0410209	0.0191010	0.5622427	1032294785	2316995465
14	168	0.1476281	0.0370290	0.0109244	0.0218487	0.0235927	0.5757929	1162147465	2322753456
14	169	0.1235175	0.0366691	0.0081779	0.0273075	0.0221306	0.7451100	1106390244	2324695122
14	170	0.1256189	0.0489288	0.0063896	0.0161632	0.0209100	0.5028390	1137465251	2321764479
14	171	0.1442245	0.0208810	0.0072856	0.0242450	0.0184184	0.5675030	976957346	2343061611
14	172	0.0487205	0.0136424	0.0089731	0.0089731	0.0152875	0.4749419	1511936441	2337754237
14	173	0.1780193	0.0221654	0.0097755	0.0239699	0.0248224	0.5514351	1428967391	2341413043
14	174	0.1954800	0.0367456	0.0074803	0.0248154	0.0211230	0.5778584	1096154221	2340691558
14	175	0.1657379	0.0272208	0.0065968	0.0286338	0.0204573	0.5156228	1036277328	2350497976
14	176	0.1014784	0.0052910	0.0059290	0.0291005	0.0174448	0.4399471	8760119048	2347698413
14	177	0.1012677	0.0084998	0.0048153	0.0159599	0.0120383	0.4575103	8058604651	2360748837
14	178	0.1679369	0.0191909	0.0047945	0.0271122	0.0174321	0.5407987	9602790698	2354634551
14	179	0.1065921	0.0181884	0.0051590	0.0306265	0.0172695	0.4480051	1136988399	2361329466
14	180	0.1819857	0.0329886	0.0046788	0.0215969	0.0196191	0.5632367	1057216138	2356017291
14	181	0.1215282	0.0073479	0.0008591	0.0044876	0.0151102	0.4456843	8209716495	236528866
14	182	0.1127885	0.0278137	0.0069666	0.0426915	0.0185424	0.5743474	1088429672	2359184971
14	183	0.1722458	0.0421289	0.0077047	0.0399605	0.0225276	0.5497446	9911478992	2365806723
14	184	0.1440220	0.0296872	0.0059634	0.0310355	0.0186485	0.4692335	1018917355	2367932231
14	185	0.1435447	0.0372889	0.0064256	0.0287921	0.0197521	0.7422969	1113502165	2366235931
14	186	0.1357312	0.0279505	0.0100828	0.0427126	0.0199659	0.4990384	1185832272	2363802548
14	187	0.1264330	0.0137305	0.0058773	0.0266085	0.0176521	0.5339251	1154230179	2371176471
14	188	0.1604167	0.0145016	0.0041258	0.0151859	0.0206801	0.6317504	9418671875	2376346354
14	189	0.1855757	0.0317525	0.0069883	0.0098107	0.0206391	0.5922519	1318394464	2376425606
14	190	0.1345437	0.0134592	0.0086524	0.0255974	0.0179064	0.4315524	104361552	2378941799
14	191	0.1178806	0.0240528	0.0057817	0.0270403	0.0212586	0.4867979	9764579055	2377299795
14	192	0.3243746	0.0435767	0.0111562	0.0993802	0.0208362	0.6371760	1095928161	2379859195
14	193	0.1386492	0.0309617	0.0115780	0.0092873	0.0184625	0.6473576	1303673016	2381463492
14	194	0.0971858	0.0229605	0.0108097	0.0230621	0.0177182	0.4977751	1182207254	2387937824
14	195	0.0946569	0.0205719	0.0207353	0.0756536	0.0286111	0.4793954	1648395833	2392.2
14	196	0.1027477	0.0196334	0.0081886	0.0239388	0.0181620	0.2240860	1014636215	2389566069
14	197	0.2144862	0.0236901	0.0077486	0.0124262	0.0188519	0.5146516	1238893976	2393614458
14	198	0.1160405	0.0204660	0.0086913	0.0219827	0.0190890	0.5410667	9407938931	2392684478
14	199	0.1319307	0.0166595	0.0059969	0.0200945	0.0188636	0.4526263	1111481752	2394025547
14	200	0.2121183	0.0423551	0.0163827	0.0207007	0.0223937	0.5532733	132545082	2395234973
14	201	0.1042688	0.0195874	0.0061138	0.0196283	0.0168777	0.7274306	1061633681	2402461806
14	202	0.1104333	0.0246248	0.0083817	0.0208485	0.0184035	0.5260046	9868935185	2398277778
14	203	0.1170378	0.0191642	0.0068731	0.0174134	0.0162600	0.6220803	1037983409	2403719457
14	204	0.1921501	0.0459500	0.0073698	0.0261663	0.0193171	0.7290872	1080022414	2409867241
14	205	0.1639898	0.0258937	0.0131060	0.0133902	0.0197442	0.5589088	1463652174	2405692754
14	206	0.1123320	0.0299522	0.0053598	0.0175533	0.0177230	0.7826075	1018496583	2413015945
14	207	0.1053702	0.0187755	0.0164546	0.0232413	0.0180712	0.4649700	129197551	2412906122
14	208	0.1093437	0.0187449	0.0059447	0.0187257	0.0197325	0.6073158	9994132029	2414256724
14	209	0.1363336	0.0187810	0.0071226	0.0133711	0.0192889	0.6313607	1160403614	2415966867
14	210	0.1318394	0.0139309	0.0098693	0.0184874	0.0151167	0.5981980	1196938095	2417928571
14	211	0.0999743	0.0174159	0.0072780	0.0148985	0.0165768	0.4917544	1180703057	2418676856
14	212	0.1879653	0.0245382	0.0085394	0.0181159	0.0237425	0.4674766	1218706522	2418097826
14	213	0.1730374	0.0305538	0.0129713	0.0509229	0.0246930	0.4578036	1234864469	2419901099
14	214	0.1299651	0.0269818	0.0076386	0.0168170	0.0191387	0.7129797	1145819018	2424230061
14	215	0.1480322	0.0257088	0.0069685	0.0166878	0.0171392	0.5565877	110667446	2425485612
14	216	0.1024579	0.0318618	0.0055549	0.0236714	0.0231191	0.4528820	9811589537	2424847082
14	217	0.1408200	0.0100919	0.0032908	0.0153709	0.0184149	0.6071301	8875559441	2431192308
14	218	0.1094749	0.0122648	0.0081458	0.0176339	0.0185419	0.5619818	910761745	2435154362
14	219	0.1082822	0.0343781	0.0053221	0.0205996	0.0216065	0.6200167	1006465251	2434436293
14	220	0.2135392	0.0398523	0.0045379	0.0265095	0.0206915	0.6841478	105438342	2428804836
14	221	0.0896061	0.0249453	0.0110706	0.0223564	0.0169495	0.8095506	1031743363	2433092035
14	222	0.1560423	0.0324715	0.0060065	0.0148508	0.0194422	0.6282112	1175408829	2440055662
14	223	0.1471347	0.0126912	0.0048720	0.0095124	0.0168364	0.4887744	1153105906	244204888
14	224	0.0914825	0.0143250	0.0054078	0.0129137	0.0141002	0.5542525	9404490446	2442691083
14	225	0.0794950	0.0214946	0.0034406	0.0093045	0.0127636	0.5378191	9639693396	2446841981
14	226	0.1220588	0.0412990	0.0096678	0.0412990	0.0173339	0.4452478	1083260417	2446725694
14	227	0.1186032	0.0417999	0.0043544	0.0169202	0.0204800	0.5300966	9857298188	2451252059
14	228	0.1226256	0.0049326	0.0026348	0.0172794	0.0187500	0.4148591	1568121094	2452394531
14	229	0.1335926	0.0221115	0.0076811	0.0159456	0.0176714	0.5638957	1134146694	2446803719
14	230	0.1143265	0.0328902	0.0053785	0.0177745	0.0207977	0.5877497	1008930341	245749226
14	231	0.1139483	0.0230949	0.0055147	0.0470143	0.0159314	0.6375780	1033417614	2453920455
14	232	0.2683284	0.0143348	0.0041653	0.0091503	0.0149551	0.4777667	1209451977	2455734463
14	233	0.1323166	0.0199982	0.0073257	0.0169027	0.0180556	0.7423203	1110981481	2454083333
14	234	0.1185100	0.0173904	0.0096455	0.0137746	0.0182533	0.4019116	1484696379	2458325905
14	235	0.1173879	0.0199188	0.0075149	0.0177248	0.0167228	0.4530017	900	2459061674
14	236	0.0934749	0.0325649	0.0068092	0.0260910	0.0152485	0.7098319	1094429929	2457888361
14	237	0.1370304	0.0362712	0.0087938	0.0193438	0.0200436	0.5532977	1190740741	2459077441
14	238	0.0739842	0.0185971	0.0137053	0.0288458	0.0231453	0.4376390	1270319588	2461164948
14	239	0.1117308	0.0268398	0.0075460	0.0377472	0.0189373	0.5163993	9374458874	2461404762
14	240	0.1764306	0.0865946	0.0102341	0.0716086	0.0237195	0.4490096	1067048469	2463020408
14	241	0.1293961	0.0365387	0.0086807	0.0241947	0.0204767	0.7404564	1027704591	247347505
14	242	0.1258768	0.0230968	0.0084139	0.0136242	0.0180337	0.5325417	1148915493	2475995305
14	243	0.0811834	0.0218553	0.0035661	0.0092535	0.0130604	0.4595803	9749122807	2471011696
14	244	0.1599673	0.0239788	0.0164828	0.0212827	0.0223039	0.4899306	1256666667	2476713542
14	245	0.1311122	0.0429460	0.0072692	0.0183963	0.0158882	0.6525852	1097929539	2478929539
14	246	0.1294532	0.0155122	0.0066575	0.0164573	0.0160594	0.4982714	1232196617	2492756871
14	247	0.1311755	0.0637873	0.0091459	0.0289341	0.0224271	0.6851121	100071891	2481018739
14	248	0.1168544	0.0199833	0.0073564	0.0124600	0.0142400	0.4045613	1359060284	2490840426
14	249	0.1170451	0.0332645	0.0086515	0.0250430	0.0171655	0.5634675	922622807	2489815789
14	250	0.0829578	0.0189122	0.0081960	0.0193357	0.0148294	0.3850597	9547969152	248559383
14	251	0.1360784	0.0266957	0.0060276	0.0350617	0.0179375	0.5343791	9813481481	2486862963
14	252	0.1318058	0.0207241	0.0076375	0.0110303	0.0172578	0.5374018	1118662921	2489865169
14	253	0.1452819	0.0464614	0.0083640	0.0327053	0.0210938	0.5555147	1055476563	249046875
14	254	0.2005529	0.0542334	0.0097589	0.0294953	0.0203536	0.5523626	1067888525	2493032787
14	255	0.0713352	0.0145525	0.0084434	0.0193144	0.0120715	0.4282113	905670068	2495173469
14	256	0.1203854	0.0305443	0.0098377	0.0121028	0.0183570	0.5572346	1204775862	2495318966
14	257	0.1387272	0.0280277	0.0077889	0.0220029	0.0169211	0.5813827	1018759516	2497652249
14	258	0.2015657	0.0178484	0.0139566	0.0335645	0.0180124	0.5569373	1631570342	2504680608
14	259	0.0789468	0.0172325	0.0133333	0.0146106	0.0144538	0.5726387	1463025714	2512137143
14	260	0.0935371	0.0193669	0.0044693	0.0097492	0.0150071	0.5682879	1078798883	2511106145
14	261	0.1133433	0.0183450	0.0062313	0.0130774	0.0155866	0.5634098	1385923729	2510682203
14	262	0.1053601	0.0195684	0.0078136	0.0166814	0.0161494	0.5691989	1044479899	2512927136
14	263	0.0865946	0.0066627	0.0044018	0.0135254	0.0127851	0.3580632	1310928571	2514494898
14	264	0.1345894	0.0127556	0.0050380	0.0092527	0.0153723	0.5710488	1337839858	2513896797
14	265	0.1178821	0.0253947	0.0072409	0.0140706	0.0177792	0.5645223	1125966292	2513689139
14	266	0.1067214	0.0208938	0.0106247	0.0103420	0.0167807	0.7036571	1448932558	2521360465
14	267	0.0051885	0.0001207	0.0012670	0.0009050	0.0076420	0.5909502	3361984615	2520805128
14	268	0.1457549	0.0124022	0.0099488	0.0127113	0.0158215	0.4783927	124362069	2521586207
14	269	0.1151961	0.0226611	0.0068207	0.0151401	0.0137255	0.4590196	1099453571	2519164286
14	270	0.1145530	0.0394495	0.0145979	0.0236104	0.0184656	0.5277478	1153963303	2523791284
14	271	0.1046511	0.0194157	0.0084766	0.0163909	0.0156009	0.5612754	1060274047	252777677
14	272	0.1548062	0.0204254	0.0056205	0.0092866	0.0158651	0.5507313	1295472313	2530726384
14	273	0.1103737	0.0287163	0.0089408	0.0209067	0.0178146	0.5357969	1022121795	2535331197
14	274	0.0847289	0.0357795	0.0066935	0.0205148	0.0135658	0.3764578	1095739414	254218241
14	275	0.1764788	0.0315129	0.0053251	0.0132838	0.0188648	0.5142209	1004275789	2533372632
14	276	0.1020176	0.0346121	0.0106849	0.0253292	0.0162357	0.4789997	1079748792	2549966184
14	277	0.1177906	0.0217160	0.0072538	0.0060448	0.0187994	0.6928936	1454219653	2542657033
14	278	0.1016340	0.0198577	0.0104767	0.0256440	0.0157247	0.4549596	1341686275	255279902
14	279	0.1384933	0.0320691	0.0081957	0.0208204	0.0174837	0.4677503	1122864035	255204386
14	280	0.0946534	0.0331083	0.0060645	0.0219222	0.0141434	0.3358834	1027770492	2559579235
14	281	0.2537238	0.0178793	0.0096749	0.0125645	0.0196336	0.5477898	1391184211	2568131579
14	282	0.0966497	0.0144203	0.0084607	0.0179713	0.0148989	0.5818743	1010232283	2563291339
14	283	0.1187242	0.0158209	0.0118825	0.0254818	0.0152318	0.5645712	1222214592	2566832618
14	284	0.1314426	0.0301587	0.0098856	0.0183824	0.0188725	0.4062909	1080235119	2567333333
14	285	0.1436067	0.0215341	0.0066763	0.0159141	0.0182615	0.6207885	1177677817	2573477113
14	286	0.2251730	0.0131103	0.0070261	0.0095252	0.0200211	0.5275856	146567402	257527451
14	287	0.1102069	0.0143610	0.0053786	0.0118190	0.0164070	0.5812524	1151272727	2574841897
14	288	0.1718273	0.0177954	0.0120855	0.0141305	0.0192710	0.5990537	1421732106	2584591002
14	289	0.2290980	0.0235966	0.0067003	0.0110028	0.0186891	0.5922577	1134405714	2585014286
14	290	0.0785367	0.0163769	0.0054551	0.0184021	0.0168686	0.4878197	1516629851	2595531343
14	291	0.1259009	0.0191971	0.0101120	0.0069434	0.0181703	0.5009046	1460306733	2593286783
14	292	0.1312113	0.0225932	0.0071774	0.0130442	0.0178915	0.4914547	1154488064	2599838196
14	293	0.1341743	0.0245677	0.0080405	0.0162955	0.0189986	0.5126185	1188606127	2609763676
14	294	0.0840009	0.0191143	0.0079577	0.0178542	0.0145671	0.5974444	1238631461	2602633708
14	295	0.1208424	0.0119245	0.0058969	0.0104430	0.0166594	0.5910966	1295.7	2607807407
14	296	0.1347174	0.0118733	0.0048782	0.0105435	0.0166836	0.5076532	1219942907	2614787197
14	297	0.1457906	0.0126666	0.0036961	0.0084068	0.0166767	0.6279583	1316558522	2613798768
14	298	0.1065177	0.0578158	0.0176580	0.0202651	0.0173513	0.4007230	1584324022	2610340782
14	299	0.1288534	0.0086223	0.0054928	0.0277496	0.0162966	0.4606285	1398145695	2615996689
14	300	0.2369793	0.0257343	0.0129931	0.0245059	0.0185841	0.5472399	1357883534	261553012
14	301	0.1628131	0.0167320	0.0063895	0.0169203	0.0176314	0.3947085	1156408	2631.72
14	302	0.1318515	0.0199151	0.0094425	0.0362067	0.0195988	0.5467245	1387935484	2636131336
14	303	0.1131028	0.0298746	0.0125221	0.0124295	0.0178322	0.5281242	1417802575	2638723176
14	304	0.0765213	0.0212306	0.0103448	0.0186782	0.0155510	0.5859365	144250431	2638698276
14	305	0.1403381	0.0244648	0.0069355	0.0102335	0.0188665	0.5148895	120075265	2632991166
14	306	0.2429901	0.0154760	0.0090522	0.0118698	0.0183042	0.5942386	1320351206	2638949062
14	307	0.1311275	0.0219538	0.0076155	0.0123337	0.0180847	0.6334296	1340723214	2637283482
14	308	0.1170588	0.0204395	0.0103854	0.0123665	0.0195673	0.5192225	1362613793	265712931
14	309	0.1360498	0.0260994	0.0129232	0.0205599	0.0187223	0.6540364	1211582343	2650879457
14	310	0.1212121	0.0186858	0.0103264	0.0131661	0.0168910	0.5551171	125584326	265237931
14	311	0.0820192	0.0233292	0.0146683	0.0178557	0.0159867	0.5261744	1448659574	2659408511
14	312	0.1016101	0.0137733	0.0046868	0.0095967	0.0157341	0.5329826	1281077236	2661979675
14	313	0.1346864	0.0184573	0.0095284	0.0154351	0.0156053	0.5665127	1217378099	2674002066
14	314	0.0833358	0.0083546	0.0016449	0.0096284	0.0136804	0.5214082	1252493606	2682867008
14	315	0.0565895	0.0090225	0.0058488	0.0265880	0.0118510	0.5211563	1282476773	2695383863
14	316	0.1717695	0.0308569	0.0222102	0.0412065	0.0238172	0.3840859	1367351682	2739406728
15	1	0.1058047	0.0104963	0.0092280	0.0126189	0.0222222	0.4555491	3024184818	6592211221
15	2	0.1432773	0.0128291	0.0002661	0.0000420	0.0167927	0.4791037	1986571429	6756285714
15	3	0.1629923	0.0150684	0.0136678	0.0343384	0.0275746	0.5784396	225310084	6950693277
15	4	0.2330602	0.0149457	0.0114855	0.0133430	0.0279973	0.5113459	2297993808	6971857585
15	5	0.1082077	0.0061287	0.0001182	0.0091438	0.0221894	0.3499655	2311085427	7151557789
15	6	0.1334331	0.0428994	0.0304593	0.0449791	0.0215955	0.6185872	2142958904	7515753425
15	7	0.1046487	0.0339624	0.0318056	0.0183088	0.0261601	0.5803595	2167033333	7598125
15	8	0.1091139	0.0186733	0.0128041	0.0009869	0.0318005	0.3955107	1953757238	7696636971
15	9	0.2311665	0.0705073	0.0224331	0.0329618	0.0333959	0.6566678	2162290807	7803846154
15	10	0.0666667	0.0324410	0.0032623	0.0070134	0.0156181	0.3569764	2389373913	7903797101
15	11	0.1514921	0.0262736	0.0028619	0.0042023	0.0281846	0.4985464	235243649	7890715935
15	12	0.2274329	0.0493955	0.0102703	0.0225785	0.0280306	0.5518634	2154946882	7961986143
15	13	0.3797546	0.0707687	0.0004331	0.0014074	0.0479249	0.4327559	1993208589	7990613497
15	14	0.1170189	0.0345585	0.0050647	0.0114195	0.0240161	0.5726283	2290750361	8009321789
15	15	0.2811156	0.0537407	0.0000000	0.0000190	0.0376832	0.3813726	1959381068	8065703883
15	16	0.1177574	0.0083088	0.0001716	0.0002696	0.0187623	0.5348897	1852796875	808890625
15	17	0.3302167	0.0242724	0.0000619	0.0042724	0.0358101	0.3554180	2117.3	8097631579
15	18	0.1245537	0.0259526	0.0001171	0.0006907	0.0197366	0.4484870	2184752239	8110716418
15	19	0.1676677	0.0528236	0.0098516	0.0282137	0.0241904	0.5308673	2165658023	8193711507
15	20	0.0794974	0.0280982	0.0216511	0.0457770	0.0129069	0.5445523	323315534	8176763754
15	21	0.1309871	0.0239048	0.0000804	0.0073672	0.0244947	0.7091135	2304476923	8226786325
15	22	0.1785244	0.0165272	0.0000809	0.0001375	0.0271276	0.5985688	1849917526	8302783505
15	23	0.1312975	0.0112641	0.0011181	0.0045891	0.0219107	0.5353192	2219523404	8324978723
15	24	0.0990386	0.0327324	0.0094307	0.0147122	0.0200443	0.4354333	2391151613	8358854839
15	25	0.1648985	0.0200893	0.0010679	0.0152311	0.0296656	0.4973302	2281537946	8324129464
15	26	0.0826033	0.0218964	0.0122892	0.0163180	0.0143751	0.5131534	3236455927	837787234
15	27	0.2137952	0.0445478	0.0000465	0.0000000	0.0300705	0.3723165	2006351779	8440395257
15	28	0.2005729	0.0230453	0.0041636	0.0083273	0.0301703	0.5224643	2129814815	8453765432
15	29	0.1476411	0.0237195	0.0021390	0.0053951	0.0250149	0.6322519	2308812121	8443575758
15	30	0.1333597	0.0116068	0.0014476	0.0054152	0.0214370	0.5475326	2178942953	8422684564
15	31	0.0951227	0.0258548	0.0027885	0.0025421	0.0190167	0.5322396	2201359296	8483366834
15	32	0.1215545	0.0210775	0.0015969	0.0058506	0.0227663	0.5238509	1857823423	8495171171
15	33	0.2742530	0.0323801	0.0000000	0.0005927	0.0322023	0.4226305	2028758186	8557657431
15	34	0.1265118	0.0382600	0.0049322	0.0127973	0.0261328	0.5921019	2294243697	8496106443
15	35	0.3408657	0.0626720	0.0014626	0.0037479	0.0333745	0.4796015	2074806527	8544428904
15	36	0.1782824	0.0202634	0.0015138	0.0123726	0.0274748	0.6058645	2362349544	8563677812
15	37	0.1135034	0.0526809	0.0025612	0.0092313	0.0257227	0.4952282	241320708	8629168142
15	38	0.0581805	0.0181154	0.0052790	0.0135826	0.0157498	0.4885052	2224255061	8584696356
15	39	0.3876632	0.0236126	0.0000936	0.0055755	0.0449472	0.5213918	1978217507	8634748011
15	40	0.1242485	0.0137711	0.0024764	0.0064892	0.0199376	0.5726683	1793511628	8719749553
15	41	0.3016642	0.0434668	0.0093508	0.0261740	0.0472648	0.6159170	2135191176	8668340336
15	42	0.1943301	0.0168154	0.0015298	0.0027924	0.0263219	0.5514478	2350386997	8666160991
15	43	0.2394244	0.0276762	0.0063492	0.0158236	0.0331960	0.5124128	2112691877	8728263305
15	44	0.2464354	0.0252372	0.0000181	0.0020421	0.0279931	0.6409325	2375129032	8697488479
15	45	0.2534655	0.0796299	0.0030668	0.0092796	0.0263759	0.5742410	2084817978	871352809
15	46	0.1073268	0.0248273	0.0042216	0.0062312	0.0214919	0.5695485	2193795374	8751156584
15	47	0.2677320	0.0241539	0.0000000	0.0029113	0.0376911	0.4153832	1990590164	8784215457
15	48	0.0766805	0.0244942	0.0037161	0.0077091	0.0161687	0.5557997	2283744875	8828200456
15	49	0.0977820	0.0147702	0.0014745	0.0054776	0.0214714	0.6183592	21725216	8901904
15	50	0.2290083	0.0326083	0.0020617	0.0044638	0.0316437	0.6740559	2356710611	8918794212
15	51	0.1524404	0.0241535	0.0023499	0.0074348	0.0238838	0.6171732	2334738703	8916797642
15	52	0.2304038	0.0343906	0.0000093	0.0011085	0.0296679	0.4920218	2408888361	8933254157
15	53	0.1010985	0.0168084	0.0053744	0.0079376	0.0233522	0.4600638	1926569277	8956716867
15	54	0.2606154	0.0738782	0.0087317	0.0098847	0.0351766	0.4971727	2383129213	8990505618
15	55	0.2295514	0.0168960	0.0018013	0.0093985	0.0260485	0.5211034	2095940678	8976576271
15	56	0.2584936	0.0345534	0.0064799	0.0450171	0.0500840	0.6720075	2430895238	9058777778
15	57	0.1259707	0.0085508	0.0004415	0.0020777	0.0219907	0.4627386	2143846026	9065943709
15	58	0.0724176	0.0321190	0.0083688	0.0151291	0.0165904	0.4517900	2287831099	9045576408
15	59	0.1104126	0.0481664	0.0084518	0.0162950	0.0254253	0.4407823	1888486005	9088447837
15	60	0.0787426	0.0197168	0.0053066	0.0132898	0.0181139	0.3681139	1712972222	9071547619
15	61	0.1592925	0.0425981	0.0073705	0.0066984	0.0250655	0.6801226	2170881356	9119830508
15	62	0.2068311	0.0223347	0.0014524	0.0061424	0.0338183	0.6077494	2408409797	9177323775
15	63	0.3859458	0.0280857	0.0014508	0.0043371	0.0389663	0.5153878	2010522158	9193545279
15	64	0.0774997	0.0167432	0.0014463	0.0136142	0.0163538	0.3834515	2466021277	9133865248
15	65	0.3503639	0.0307218	0.0000000	0.0003939	0.0382567	0.4999401	1994646288	9169956332
15	66	0.1303161	0.0243294	0.0068780	0.0128690	0.0193731	0.3898700	2115002217	9201152993
15	67	0.1390784	0.0344510	0.0104314	0.0174118	0.0275392	0.4503235	24520675	9167525
15	68	0.0952211	0.0282607	0.0084147	0.0156228	0.0204731	0.6323410	2360281377	9186558704
15	69	0.1219001	0.0190163	0.0020602	0.0004641	0.0229022	0.5972666	2388890767	9286189857
15	70	0.1209089	0.0251176	0.0009896	0.0054242	0.0182518	0.6335227	2506267913	9272336449
15	71	0.1524152	0.0531396	0.0184637	0.0104637	0.0222284	0.6646828	2186976471	9312494118
15	72	0.1185342	0.0191964	0.0004629	0.0056059	0.0205850	0.6003986	2491196721	9300590164
15	73	0.1266564	0.0149431	0.0021952	0.0008003	0.0239753	0.3674384	1914667638	9354664723
15	74	0.1345225	0.0091335	0.0001139	0.0015560	0.0184314	0.6772802	3273577419	9330580645
15	75	0.1369532	0.0297953	0.0117647	0.0009050	0.0221332	0.6260806	2167804396	9338153846
15	76	0.1153936	0.0236657	0.0058944	0.0119411	0.0209792	0.4855207	228003272	9346891616
15	77	0.2388706	0.0212157	0.0043451	0.0061176	0.0268627	0.5944392	2062.85	937886
15	78	0.1147923	0.0101570	0.0021786	0.0055743	0.0372324	0.4774097	2126881226	9425210728
15	79	0.1006404	0.0312336	0.0001986	0.0011914	0.0243932	0.6172549	2454729114	9426708861
15	80	0.1129369	0.0276286	0.0019253	0.0023515	0.0183575	0.6242612	2212059783	943067029
15	81	0.1195442	0.0125513	0.0035398	0.0033432	0.0216207	0.6203366	3279619469	9475339233
15	82	0.1538279	0.0308149	0.0028566	0.0074592	0.0277161	0.6740208	2425240093	941972028
15	83	0.1431562	0.0280455	0.0013156	0.0072233	0.0252941	0.5182733	2239048387	9442854839
15	84	0.2387056	0.0420851	0.0056751	0.0071523	0.0272809	0.4869122	2079485095	9458075881
15	85	0.1023991	0.0297693	0.0055017	0.0174394	0.0217705	0.5711822	2262408824	9469323529
15	86	0.2152468	0.0524408	0.0020216	0.0017512	0.0259162	0.6383773	2001.85	9488189655
15	87	0.1486268	0.0579758	0.0024536	0.0017230	0.0231228	0.6617802	2022483304	9525237258
15	88	0.1117438	0.0132301	0.0010885	0.0012839	0.0201661	0.4523341	1934430605	9555836299
15	89	0.0843949	0.0212995	0.0027938	0.0026144	0.0163185	0.5065488	2338823529	9562679739
15	90	0.1714535	0.0408555	0.0003628	0.0017514	0.0237667	0.5435908	1970338078	9562081851
15	91	0.1475651	0.0376043	0.0071016	0.0013832	0.0209483	0.4412834	2356225455	9604036364
15	92	0.0993240	0.0474199	0.0028635	0.0025864	0.0192803	0.6783222	2185079229	9640620985
15	93	0.0737707	0.0172056	0.0015194	0.0030798	0.0186839	0.5140745	2543848168	9642198953
15	94	0.0721284	0.0102008	0.0022392	0.0054618	0.0160417	0.4469285	226089426	9664259819
15	95	0.2065718	0.0090071	0.0004656	0.0014863	0.0223118	0.4874205	2243968037	966173516
15	96	0.1283996	0.0334135	0.0041705	0.0035233	0.0287453	0.6208468	2394014104	9628138223
15	97	0.1266371	0.0521273	0.0112714	0.0035269	0.0223085	0.5025651	2461707547	9709433962
15	98	0.1378356	0.0338325	0.0024273	0.0025774	0.0419562	0.6080389	2413678869	9688136439
15	99	0.1279316	0.0360418	0.0045167	0.0046693	0.0240940	0.4478065	2053836576	9730428016
15	100	0.0681479	0.0104292	0.0027317	0.0008256	0.0176896	0.3990409	1685882353	9743343653
15	101	0.0993736	0.0180646	0.0053922	0.0116739	0.0175200	0.6071260	2289657407	9760300926
15	102	0.0668937	0.0200206	0.0025697	0.0044169	0.0160372	0.5860062	2199381579	9761789474
15	103	0.0794013	0.0098874	0.0039424	0.0163329	0.0139237	0.4963913	3290055851	9745292553
15	104	0.1040242	0.0222298	0.0032148	0.0038190	0.0173393	0.5593935	1942840116	9798081395
15	105	0.0810248	0.0212915	0.0033778	0.0076549	0.0187503	0.6333699	2477346667	9854133333
15	106	0.1441541	0.0628631	0.0046642	0.0032067	0.0277425	0.5678917	2517010619	9878690265
15	107	0.1314948	0.0204934	0.0030276	0.0007759	0.0221885	0.6600042	2434567742	986.2
15	108	0.0855441	0.0157649	0.0004158	0.0056520	0.0180460	0.6388561	2227584527	9883094556
15	109	0.1058587	0.0227380	0.0027876	0.0027404	0.0162532	0.5102882	2377177711	9927349398
15	110	0.2102320	0.0415960	0.0080486	0.0029198	0.0256272	0.6245912	2459172489	993058952
15	111	0.1144385	0.0291826	0.0006196	0.0055768	0.0239793	0.5257958	2562140693	996.5
15	112	0.1317339	0.0162740	0.0006359	0.0021390	0.0282025	0.5452811	2414700246	993041769
15	113	0.0962201	0.0281965	0.0003131	0.0001193	0.0192947	0.5639753	2054965779	9960836502
15	114	0.0890225	0.0260985	0.0035995	0.0043652	0.0168670	0.5271576	2291961679	9992007299
15	115	0.1929450	0.0213075	0.0018611	0.0067322	0.0281821	0.4975645	1969179177	1000869249
15	116	0.1323604	0.0280946	0.0000150	0.0025296	0.0194582	0.3336327	2002683206	100198855
15	117	0.1389429	0.0270077	0.0060926	0.0045695	0.0279739	0.5121569	2538875362	1002453623
15	118	0.0840382	0.0049603	0.0022046	0.0031373	0.0195125	0.5612295	2177043243	1002791892
15	119	0.1256781	0.0150288	0.0021056	0.0056436	0.0190443	0.5775117	2021848303	100658483
15	120	0.1664067	0.0260250	0.0036245	0.0029560	0.0190954	0.5587938	2073079545	1004020833
15	121	0.1256747	0.0137140	0.0023991	0.0063668	0.0236332	0.4833679	2230508824	1006508824
15	122	0.1227027	0.0127890	0.0010975	0.0004609	0.0196664	0.5364282	2437483209	1007003731
15	123	0.1525995	0.0299903	0.0006057	0.0001708	0.0271870	0.4974723	1869221782	1005683168
15	124	0.1122652	0.0154743	0.0004475	0.0037214	0.0207619	0.5029971	211957958	1010576577
15	125	0.1381325	0.0279398	0.0018441	0.0112759	0.0249847	0.4512804	2413473088	1011294618
15	126	0.1361420	0.0344250	0.0022470	0.0018972	0.0253418	0.4809751	1788445946	1009864865
15	127	0.1736504	0.0298904	0.0028305	0.0090371	0.0226339	0.4573414	2389238845	1013753281
15	128	0.1144108	0.0204150	0.0018351	0.0025281	0.0211536	0.5581192	2490429126	1009893204
15	129	0.1246423	0.0246451	0.0042172	0.0048141	0.0226871	0.6142471	2515291607	1013991465
15	130	0.0898776	0.0188617	0.0031482	0.0033301	0.0218188	0.5433875	256987007	1017540603
15	131	0.1161152	0.0239813	0.0015395	0.0007353	0.0248315	0.6071232	1970007813	1025951172
15	132	0.0645043	0.0099322	0.0032527	0.0056899	0.0151915	0.4979934	2196133178	101964486
15	133	0.1805177	0.0324803	0.0025184	0.0035892	0.0238544	0.6259961	2448845574	1023493409
15	134	0.1242066	0.0197318	0.0041163	0.0052317	0.0233612	0.6345948	2418293454	102831377
15	135	0.0694580	0.0017467	0.0025002	0.0026886	0.0135971	0.4132374	3325742358	1030733624
15	136	0.0929598	0.0141080	0.0036803	0.0058444	0.0193459	0.6086288	253243058	1031901582
15	137	0.1369415	0.0259000	0.0066940	0.0059949	0.0265590	0.5659917	1892377049	1035057377
15	138	0.0517236	0.0287951	0.0035737	0.0060563	0.0227862	0.5095667	2267616935	1027512097
15	139	0.1720910	0.0133247	0.0012881	0.0055245	0.0251038	0.6896952	239929562	1034262774
15	140	0.1247149	0.0283801	0.0048058	0.0049660	0.0298026	0.5257657	2556655229	1030661765
15	141	0.1336166	0.0443682	0.0049891	0.0046623	0.0227015	0.5753813	1993658333	1036605556
15	142	0.2406360	0.0280884	0.0054597	0.0035682	0.0274856	0.7074898	2514091873	1045063604
15	143	0.0944637	0.0237271	0.0091448	0.0061954	0.0187346	0.4415884	2345840336	1040109244
15	144	0.1611932	0.0202003	0.0022194	0.0126658	0.0220359	0.4420442	2583451064	1046980851
15	145	0.1132311	0.0139783	0.0026518	0.0017866	0.0205742	0.4913535	2067810888	1047707736
15	146	0.1437752	0.0217917	0.0009158	0.0003522	0.0242574	0.5255841	1977231537	1046788423
15	147	0.0934114	0.0318261	0.0032785	0.0030603	0.0201418	0.5644992	2165412884	1036913616
15	148	0.0959739	0.0279041	0.0033900	0.0074248	0.0210283	0.6528279	2456633333	1047186667
15	149	0.1605899	0.0270426	0.0047772	0.0075968	0.0258175	0.7025442	2430365289	105146281
15	150	0.2485621	0.0245534	0.0068519	0.0088235	0.0257516	0.6951634	2402566667	1050044444
15	151	0.1519936	0.0209386	0.0035385	0.0105701	0.0261152	0.5715913	2539835476	1054755784
15	152	0.1756414	0.0246579	0.0032358	0.0095078	0.0225942	0.6435300	2499534181	1058200318
15	153	0.2058468	0.0244246	0.0018471	0.0144146	0.0329213	0.4047954	2568731884	1056985507
15	154	0.0753015	0.0111338	0.0006928	0.0001856	0.0201150	0.4738542	2127037855	1056037855
15	155	0.1044381	0.0194931	0.0053467	0.0048876	0.0187853	0.5385557	2381060976	1056070732
15	156	0.1369482	0.0195149	0.0018679	0.0017285	0.0297463	0.4798532	1751947867	1060661137
15	157	0.1263470	0.0197067	0.0010628	0.0002884	0.0254078	0.4887461	1705894958	1065493697
15	158	0.1197431	0.0211340	0.0003091	0.0002801	0.0250942	0.5089926	1966256158	1065066502
15	159	0.1461613	0.0217574	0.0032128	0.0084287	0.0206479	0.4865981	2027392927	1061445972
15	160	0.0783026	0.0321129	0.0066039	0.0093238	0.0175532	0.4958665	2290043776	106646922
15	161	0.0620617	0.0116345	0.0048816	0.0024245	0.0168904	0.4938410	2076626556	1066651452
15	162	0.0872610	0.0298137	0.0071124	0.0053587	0.0215808	0.4506759	1857614907	1069568323
15	163	0.0902715	0.0207843	0.0045249	0.0073906	0.0195626	0.7489291	2446628846	1068171154
15	164	0.1497168	0.0060784	0.0005882	0.0025926	0.0221569	0.3241612	1679744444	1074.65
15	165	0.0950130	0.0035813	0.0011818	0.0076104	0.0157579	0.5210672	2364178082	1073826484
15	166	0.1104629	0.0143143	0.0045157	0.0143359	0.0226652	0.4640091	1832435262	1077112948
15	167	0.2183175	0.0179190	0.0031373	0.0032574	0.0309551	0.4524099	2553585484	1076320968
15	168	0.1021857	0.0237169	0.0062085	0.0048813	0.0221197	0.6278784	2424527725	1076206501
15	169	0.1247002	0.0197101	0.0088775	0.0057971	0.0273941	0.4591304	2580024638	1078757971
15	170	0.0727167	0.0082172	0.0012384	0.0043473	0.0155573	0.4051858	2396875	1086098684
15	171	0.1240787	0.0211872	0.0020447	0.0020218	0.0223087	0.5922713	1973702335	1081178988
15	172	0.1649571	0.0247965	0.0043913	0.0050139	0.0272216	0.4030040	233908078	1085601671
15	173	0.1085434	0.0206232	0.0026144	0.0000934	0.0289916	0.4803572	1851535714	108964881
15	174	0.1353142	0.0235495	0.0055505	0.0034992	0.0225641	0.4211966	2121225641	1091102564
15	175	0.1110908	0.0221209	0.0036581	0.0012565	0.0223742	0.6343416	1703165375	1089617571
15	176	0.1589489	0.0320127	0.0032680	0.0038544	0.0292864	0.6544319	2530364155	1084721461
15	177	0.1504850	0.0233989	0.0061226	0.0057133	0.0240693	0.5563347	2496579425	1091288956
15	178	0.1202866	0.0356963	0.0035571	0.0073655	0.0243464	0.5452489	2442647436	1091791667
15	179	0.1654902	0.0098039	0.0067528	0.0087901	0.0319464	0.5947298	1664543902	1093729268
15	180	0.1435421	0.0506135	0.0018090	0.0051107	0.0240228	0.5951803	2238222581	1095287097
15	181	0.1395636	0.0156546	0.0003004	0.0023640	0.0241145	0.4774747	2150076613	1098915323
15	182	0.1373052	0.0198781	0.0014894	0.0049020	0.0244532	0.6425905	1684216346	1107939103
15	183	0.0781002	0.0168919	0.0056571	0.0080154	0.0208135	0.5282062	1765743243	1101655405
15	184	0.0738987	0.0184263	0.0047161	0.0030048	0.0175096	0.6324319	2406171429	1103571429
15	185	0.1225875	0.0376970	0.0021466	0.0135204	0.0251890	0.5972895	2559738562	1101035948
15	186	0.0846343	0.0112279	0.0037501	0.0076418	0.0203236	0.6339149	2595568441	1104851711
15	187	0.1146581	0.0308910	0.0069564	0.0054199	0.0270993	0.5975767	2523670565	1103419103
15	188	0.0802799	0.0107918	0.0045053	0.0138153	0.0209100	0.5228933	1603570611	1102291985
15	189	0.1547122	0.0125343	0.0021084	0.0052815	0.0214948	0.5909446	2312986559	1106801075
15	190	0.2605140	0.0217628	0.0026804	0.0078203	0.0276490	0.6384695	2167636893	1108376699
15	191	0.1161302	0.0490689	0.0047601	0.0119990	0.0226908	0.6634604	2243981132	1109544025
15	192	0.1531729	0.0199380	0.0003591	0.0023807	0.0235873	0.5139398	2089387001	1108237814
15	193	0.1505104	0.0299103	0.0011204	0.0037127	0.0264255	0.6612069	2225007264	111174092
15	194	0.1005882	0.0126797	0.0007081	0.0079956	0.0207952	0.5509042	2391316667	1111688889
15	195	0.1024399	0.0196433	0.0057049	0.0058469	0.0229882	0.5945701	245340724	1114223982
15	196	0.1090883	0.0201374	0.0019178	0.0028195	0.0254329	0.4518964	2140437956	1119565693
15	197	0.3449052	0.0353227	0.0065788	0.0069645	0.0347441	0.6637809	2550704918	1120639344
15	198	0.0692389	0.0066878	0.0013241	0.0036854	0.0160236	0.4729749	2627436559	1119703226
15	199	0.1170941	0.0165891	0.0023304	0.0068952	0.0250811	0.6783524	2578435971	1122591367
15	200	0.1105289	0.0230483	0.0082781	0.0075927	0.0244390	0.5191564	2606327731	1126957983
15	201	0.1438393	0.0322198	0.0049383	0.0095231	0.0241104	0.6472283	1640120988	1124840741
15	202	0.0651834	0.0196078	0.0068206	0.0073937	0.0188325	0.6168998	2463209169	1128796562
15	203	0.1065729	0.0339827	0.0066774	0.0053027	0.0208876	0.5017834	1695617124	1129074313
15	204	0.0984749	0.0216183	0.0054887	0.0059244	0.0198754	0.5788021	24108577	1125998051
15	205	0.1364231	0.0283224	0.0052288	0.0088929	0.0230739	0.4096059	2076055556	1130828283
15	206	0.1522731	0.0237029	0.0019087	0.0066025	0.0267656	0.5779195	2154969027	1129986726
15	207	0.1899012	0.0228599	0.0072533	0.0162681	0.0215288	0.4663239	228550813	1131892276
15	208	0.0843852	0.0193730	0.0023795	0.0029412	0.0198734	0.4954351	2316921875	1130893229
15	209	0.1160855	0.0319831	0.0049078	0.0072326	0.0203241	0.5208289	2500320359	1133634731
15	210	0.0955462	0.0134104	0.0017367	0.0043627	0.0209804	0.6272619	2227044643	1135869643
15	211	0.0969879	0.0252239	0.0084449	0.0073382	0.0235432	0.6559118	2535134039	1133582011
15	212	0.1128161	0.0523607	0.0026956	0.0052775	0.0236106	0.5620184	2440492754	1135165631
15	213	0.1251901	0.0318589	0.0026799	0.0071395	0.0237570	0.4976564	2334432718	1137725594
15	214	0.0594647	0.0212480	0.0033997	0.0018042	0.0184001	0.3831358	1804627376	1141859316
15	215	0.1338776	0.0185472	0.0005443	0.0075222	0.0247157	0.3773219	2419669039	1141651246
15	216	0.1922007	0.0142475	0.0006053	0.0082116	0.0244681	0.5940606	2168004474	1144174497
15	217	0.1131205	0.0421502	0.0028868	0.0030566	0.0227918	0.6487516	1668699594	1136859269
15	218	0.0872648	0.0125041	0.0046742	0.0075262	0.0179441	0.4818512	2246387205	1142915825
15	219	0.1640389	0.0422747	0.0097637	0.0026105	0.0238974	0.5409005	1955293255	1147627566
15	220	0.2096886	0.0321189	0.0043015	0.0032295	0.0245200	0.4905353	2191595156	1149730104
15	221	0.1114235	0.0176512	0.0015374	0.0054343	0.0211699	0.6720599	2454855346	1151356394
15	222	0.1592847	0.0306447	0.0060110	0.0127875	0.0455278	0.5505631	25988512	11502848
15	223	0.1027247	0.0108989	0.0034632	0.0193192	0.0212036	0.3852305	2271528139	114665368
15	224	0.0623110	0.0093192	0.0060777	0.0026337	0.0210983	0.5310759	1999210332	1155254613
15	225	0.1534044	0.0306855	0.0041995	0.0036128	0.0303844	0.5759302	2573866142	1159332677
15	226	0.1980112	0.0249972	0.0038936	0.0068571	0.0345714	0.5546331	2526058571	1164.48
15	227	0.1203199	0.0111302	0.0022746	0.0015659	0.0244271	0.5473119	1530502582	1153817556
15	228	0.0834487	0.0213709	0.0023810	0.0072170	0.0216840	0.6315620	2386212185	1161638655
15	229	0.1093117	0.0184647	0.0023418	0.0038422	0.0206398	0.6098595	2230046559	1160267206
15	230	0.0588810	0.0136392	0.0006555	0.0067046	0.0148008	0.5832327	2639020528	116101173
15	231	0.0932688	0.0274510	0.0010356	0.0038706	0.0234445	0.4670571	1990874459	1163073593
15	232	0.1861531	0.0190103	0.0024743	0.0062372	0.0265733	0.6950514	2546864286	1169485714
15	233	0.1666853	0.0397143	0.0072404	0.0096514	0.0272501	0.5780705	241470019	1170294118
15	234	0.0760576	0.0144593	0.0072657	0.0080035	0.0222623	0.5860460	262204499	1166425358
15	235	0.0946836	0.0130786	0.0058217	0.0032444	0.0229735	0.5724783	2299466495	1174123711
15	236	0.1907226	0.0396470	0.0047340	0.0815706	0.0600572	0.6634271	220584399	1171253197
15	237	0.0655882	0.0242974	0.0025000	0.0014542	0.0165196	0.3872222	1681408333	1173995833
15	238	0.2270890	0.0208673	0.0025641	0.0065913	0.0266214	0.5943590	2448294231	1174851923
15	239	0.1045944	0.0179732	0.0075789	0.0056305	0.0247926	0.5773292	2595423158	1174.04
15	240	0.0789105	0.0206546	0.0026684	0.0049536	0.0156052	0.5298835	2638960526	1183578947
15	241	0.0568152	0.0040998	0.0016162	0.0015686	0.0161141	0.4950327	1647766667	118569697
15	242	0.1173679	0.0183347	0.0082721	0.0037446	0.0220180	0.6130991	2545541667	1186515625
15	243	0.1238519	0.0308299	0.0044847	0.0028362	0.0251881	0.4823530	1878689295	1184548303
15	244	0.3686719	0.0340499	0.0026551	0.0239627	0.0418041	0.6427262	2215932011	1185450425
15	245	0.3105385	0.0260682	0.0019878	0.0064711	0.0287690	0.5477016	2233220386	1186385675
15	246	0.0675944	0.0206620	0.0036896	0.0014126	0.0203036	0.4558718	1760290323	1188435484
15	247	0.1637316	0.0183981	0.0064466	0.0076402	0.0340356	0.7061259	2390979296	1187312629
15	248	0.0775965	0.0186549	0.0037613	0.0037276	0.0234113	0.7935737	2408313978	1193283871
15	249	0.1371607	0.0293777	0.0071311	0.0049530	0.0265976	0.4250268	2503544726	1192194927
15	250	0.1350471	0.0379959	0.0096880	0.0282776	0.0293059	0.5537074	22778509	1194686375
15	251	0.1184061	0.0216319	0.0030108	0.0075227	0.0264896	0.6470251	2297402151	1195387097
15	252	0.1323578	0.0204078	0.0103795	0.0103600	0.0264560	0.4754658	2592756219	1201228856
15	253	0.1110642	0.0178407	0.0029218	0.0045552	0.0265498	0.5835604	166543447	1204739677
15	254	0.0976920	0.0213595	0.0001105	0.0019884	0.0251312	0.6316803	2171462777	1203247485
15	255	0.1587183	0.0263456	0.0028293	0.0106593	0.0282142	0.7575997	2225469799	1202815436
15	256	0.1582739	0.0571895	0.0028149	0.0079323	0.0265969	0.7235369	2250691288	1208727273
15	257	0.1376802	0.0088980	0.0024329	0.0066522	0.0244822	0.5707286	2439887202	1206006508
15	258	0.0380890	0.0082981	0.0045174	0.0070632	0.0137363	0.4491713	2661969613	1205024862
15	259	0.1249571	0.0263965	0.0005805	0.0012795	0.0241336	0.6871631	2271519637	1211891239
15	260	0.0776341	0.0243082	0.0051824	0.0054883	0.0339128	0.5689519	2479371158	1208108747
15	261	0.1057374	0.0188321	0.0036999	0.0020119	0.0256351	0.6648849	2396428261	1212956522
15	262	0.1156773	0.0356970	0.0053362	0.0114782	0.0244964	0.6238607	2228269406	1218771689
15	263	0.1228346	0.0211826	0.0008131	0.0038495	0.0652566	0.5994648	2460049869	1216971129
15	264	0.1497927	0.0419170	0.0244423	0.0327791	0.0293698	0.4419822	2069712589	121875772
15	265	0.1114349	0.0170588	0.0037166	0.0029144	0.0221569	0.4812656	2185297727	1217145455
15	266	0.1016238	0.0183058	0.0055300	0.0041207	0.0209814	0.5406914	2525420573	1213125
15	267	0.1378213	0.0193095	0.0035454	0.0050630	0.0238883	0.6265906	2298684675	1235766262
15	268	0.1408209	0.0230877	0.0075092	0.0044064	0.0256626	0.4027580	2420184066	1227145604
15	269	0.1509972	0.0372493	0.0036869	0.0049606	0.0271158	0.5170773	2441233618	1228663818
15	270	0.0972885	0.0149620	0.0033475	0.0043014	0.0206501	0.5805158	248063964	1233869369
15	271	0.1076103	0.0140335	0.0007212	0.0000000	0.0335512	0.3628878	1904019157	123543295
15	272	0.1014455	0.0083082	0.0034565	0.0109854	0.0214555	0.5018979	2648913462	1237371795
15	273	0.0651432	0.0125264	0.0000282	0.0000000	0.0223022	0.4608831	1771244604	1233672662
15	274	0.1982733	0.0244503	0.0045125	0.0172825	0.0262538	0.6240973	2256587084	1232682975
15	275	0.1528344	0.0190814	0.0062409	0.0087968	0.0268559	0.5447395	2219857977	1239175097
15	276	0.2985710	0.0389415	0.0060236	0.0095297	0.0290628	0.5184530	2074877119	1245521186
15	277	0.0954689	0.0134817	0.0021538	0.0073860	0.0193437	0.4972061	2496906736	1249417098
15	278	0.1235799	0.0163279	0.0028042	0.0036909	0.0245747	0.5452711	2395106618	1248143382
15	279	0.1333454	0.0357873	0.0045230	0.0042223	0.0237099	0.5953567	2445435583	1249588957
15	280	0.1717647	0.0183578	0.0057026	0.0036765	0.0293137	0.5906209	2474297917	1256408333
15	281	0.0981462	0.0149020	0.0011854	0.0111141	0.0224599	0.4923886	2654990909	1259745455
15	282	0.2138693	0.0278017	0.0031218	0.0061174	0.0278719	0.5723666	2153980322	1264397138
15	283	0.1629155	0.0193261	0.0008043	0.0188899	0.0266103	0.5911390	2277557358	1265269988
15	284	0.1536232	0.0278346	0.0052089	0.0001364	0.0270077	0.5836658	2442469565	1268917391
15	285	0.1467854	0.0149051	0.0010155	0.0014061	0.0250605	0.4556050	2392227092	1272358566
15	286	0.1036031	0.0151135	0.0041846	0.0037287	0.0247334	0.5969434	2657593145	1277138599
15	287	0.1269971	0.0150054	0.0018882	0.0006536	0.0277233	0.4337963	2208641204	1283421296
15	288	0.1245943	0.0234787	0.0069895	0.0016565	0.0289976	0.6043949	2421553879	1280387931
15	289	0.1090473	0.0238304	0.0033439	0.0007892	0.0202831	0.4826052	2081630705	1288396266
15	290	0.0909913	0.0067211	0.0048693	0.0250000	0.0264815	0.5956754	1636902778	1288883333
15	291	0.1954751	0.0208145	0.0012354	0.0068663	0.0227824	0.3739711	2643153846	1290725275
15	292	0.1791426	0.0257613	0.0013281	0.0033636	0.0259971	0.5192896	2442763527	1294863727
15	293	0.1772709	0.0222489	0.0008346	0.0158806	0.0218945	0.6630424	2682198251	12906793
15	294	0.0788530	0.0521189	0.0005693	0.0000422	0.0300021	0.3416192	192416129	1295919355
15	295	0.0721212	0.0095722	0.0000713	0.0024242	0.0272549	0.4876292	1651895455	1300
15	296	0.0630614	0.0222644	0.0118280	0.0123761	0.0229812	0.3991145	2715258065	129605914
15	297	0.2147938	0.0169484	0.0028037	0.0092675	0.0350868	0.6133514	2669666667	1300843678
15	298	0.1536843	0.0399514	0.0041644	0.0066659	0.0288931	0.5662951	2104619137	1303947467
15	299	0.0997029	0.0294033	0.0041762	0.0025295	0.0242509	0.6611408	2401995671	1309409091
15	300	0.1564980	0.0295121	0.0053625	0.0087460	0.0314455	0.5473963	2648406977	1307755814
15	301	0.1447008	0.0366230	0.0018922	0.0034738	0.0278554	0.5007330	2696828729	1316968692
15	302	0.1624295	0.0089431	0.0004017	0.0065423	0.0215017	0.5290101	1518602439	1317029268
15	303	0.1634391	0.0260537	0.0033813	0.0104513	0.0257464	0.5701085	2233551069	1316230404
15	304	0.1231862	0.0232983	0.0010195	0.0033031	0.0232100	0.5959357	2340090121	1326431542
15	305	0.1243040	0.0354152	0.0119584	0.0101307	0.0230695	0.5680102	2188518519	1321098765
15	306	0.1320382	0.0177603	0.0062763	0.0056152	0.0273423	0.5965494	2383489607	1322471132
15	307	0.0685723	0.0187101	0.0003465	0.0002205	0.0151823	0.4841011	1447630522	1325445783
15	308	0.0731340	0.0381974	0.0038457	0.0032824	0.0203662	0.5582927	2631571823	1336770718
15	309	0.1048407	0.0324346	0.0007966	0.0034620	0.0196385	0.6701083	2662528646	1337747396
15	310	0.0852003	0.0203484	0.0086462	0.0105966	0.0222257	0.4233417	2229545213	1345146277
15	311	0.1031476	0.0330882	0.0056760	0.0021672	0.0238261	0.4698014	1525940789	1340546053
15	312	0.1381664	0.0224271	0.0035506	0.0020721	0.0259353	0.6477849	2686912162	1340228378
15	313	0.0996824	0.0217955	0.0008267	0.0001311	0.0267856	0.4249609	1737796915	1342524422
15	314	0.1171750	0.0139252	0.0108448	0.0467018	0.0259743	0.5477608	2262029321	1345800926
15	315	0.0965236	0.0220612	0.0003694	0.0003221	0.0243156	0.4209814	2710956522	1343275362
15	316	0.1338971	0.0112258	0.0000166	0.0015670	0.0281806	0.5322721	1718460888	1347010571
15	317	0.0874039	0.0280000	0.0015059	0.0000000	0.0233098	0.4649882	2663.9	1354.08
15	318	0.0733625	0.0156654	0.0012655	0.0028369	0.0200459	0.6016479	2590590426	1364494681
15	319	0.1125995	0.0192972	0.0023296	0.0009707	0.0242283	0.4877597	2702809406	136204703
15	320	0.1139483	0.0092097	0.0015746	0.0110517	0.0217172	0.4692365	2343954545	1370882576
15	321	0.0393691	0.0072720	0.0100085	0.0125149	0.0156181	0.4410316	2804086957	139088913
15	322	0.1106618	0.0130602	0.0046043	0.0117472	0.0293067	0.4528361	2316004464	1393495536
15	323	0.0784685	0.0058731	0.0014125	0.0021931	0.0338630	0.4009850	1457440758	1394090047
15	324	0.1117299	0.0269753	0.0041536	0.0141548	0.0208841	0.4853928	1537926036	1397213018
15	325	0.1331858	0.0112528	0.0002516	0.0036266	0.0281884	0.4597345	2115172566	1404856195
15	326	0.1395842	0.0252402	0.0007238	0.0022108	0.0277537	0.4003553	2587963087	1396258389
15	327	0.1147559	0.0267707	0.0017107	0.0083433	0.0219988	0.5391457	1556890306	1401397959
15	328	0.1187770	0.0179572	0.0080979	0.0354603	0.0363133	0.3911599	1777322034	139709887
15	329	0.1324087	0.0214252	0.0017217	0.0077475	0.0250917	0.5154790	2302121951	1401398374
15	330	0.0980080	0.0217299	0.0065637	0.0058147	0.0232694	0.5796536	1568119363	1419461538
15	331	0.1115835	0.0230131	0.0031307	0.0031746	0.0226177	0.5195914	1487890756	1451240896
15	332	0.0776401	0.0222843	0.0020131	0.0044569	0.0161168	0.5091523	1528068249	1465299703
15	333	0.2169734	0.0167088	0.0082762	0.0228077	0.0360760	0.5497414	2558638037	1472754601
15	334	0.0760220	0.0213892	0.0012687	0.0028707	0.0210432	0.3803025	2413718954	1481856209
15	335	0.1578959	0.0253637	0.0007801	0.0089395	0.0344191	0.4874447	1701932796	1477139785
15	336	0.0769239	0.0223824	0.0000000	0.0000000	0.0235622	0.4130319	1301660167	1485930362
15	337	0.1162630	0.0322440	0.0067410	0.0290017	0.0321671	0.3604767	2705862745	1507379085
15	338	0.0415406	0.0077591	0.0047339	0.0089076	0.0139496	0.4464286	1251653571	1508496429
15	339	0.0606870	0.0417140	0.0199560	0.0199355	0.0228127	0.4717862	1976840731	1523167102
15	340	0.1435368	0.0213289	0.0000492	0.0000861	0.0242055	0.5312189	1714605016	1532316614
15	341	0.1559607	0.0224280	0.0033234	0.0067132	0.0299577	0.5278450	2238014528	1540661017
15	342	0.1138356	0.0255283	0.0117562	0.0402321	0.0217931	0.5283954	2492552916	1541479482
15	343	0.1103005	0.0204641	0.0057368	0.0169792	0.0176385	0.6264235	251590393	1542731441
15	344	0.1397650	0.0192782	0.0045977	0.0125676	0.0183232	0.4876859	2471023707	1555560345
15	345	0.2323148	0.0202001	0.0023960	0.0054740	0.0221654	0.5469915	257298627	1550237986
15	346	0.0836132	0.0229656	0.0083074	0.0174356	0.0220868	0.5546906	2548786469	1554230444
15	347	0.1224401	0.0143542	0.0037224	0.0048553	0.0177653	0.5548459	2657463492	1562469841
15	348	0.0921479	0.0181753	0.0028203	0.0082281	0.0208524	0.5373982	1240121005	1568732877
15	349	0.2081428	0.0392287	0.0115823	0.0111393	0.0252361	0.4215230	2585122924	1570870432
15	350	0.0650233	0.0142484	0.0117460	0.0281793	0.0242577	0.4091503	2606933333	1575085714
15	351	0.1344655	0.0230456	0.0033452	0.0045700	0.0233544	0.5787659	2536089239	1577685039
15	352	0.1908247	0.0188445	0.0018859	0.0058973	0.0240982	0.4166742	1368778626	1581125954
15	353	0.1173355	0.0221918	0.0004788	0.0025916	0.0195090	0.6142575	2472802326	1578984496
15	354	0.0539430	0.0166110	0.0026201	0.0119873	0.0223478	0.4894255	1441074236	1587117904
15	355	0.1586280	0.0228975	0.0018956	0.0016749	0.0234191	0.5078983	2559071611	1588757033
15	356	0.0892827	0.0327366	0.0016076	0.0004750	0.0208135	0.3706735	2020767081	1586543478
15	357	0.0065972	0.0003064	0.0009395	0.0000000	0.0078431	0.6432394	28803125	1598.25
15	358	0.0606479	0.0201961	0.0007417	0.0008184	0.0217818	0.3990708	237071087	1591.95
15	359	0.0811332	0.0243940	0.0000000	0.0000000	0.0236220	0.4814420	1376755906	1610366142
15	360	0.0562564	0.0178912	0.0046775	0.0034491	0.0172455	0.5464525	251153012	1614160643
15	361	0.1854833	0.0461415	0.0026373	0.0038642	0.0256393	0.4186561	2457804094	1617195906
15	362	0.1013008	0.0193794	0.0119805	0.0111555	0.0214354	0.5612539	2543398058	1622854369
15	363	0.0539162	0.0098146	0.0000000	0.0001071	0.0169720	0.4359799	1468721311	1657469945
15	364	0.1009524	0.0158319	0.0061513	0.0146218	0.0193165	0.6004818	2475651429	1665228571
15	365	0.0719735	0.0189933	0.0028387	0.0047703	0.0190225	0.5296654	2491323383	1677522388
15	366	0.1015326	0.0035610	0.0000000	0.0000000	0.0220194	0.5018368	1271451149	1688456897
15	367	0.1455259	0.0122231	0.0015279	0.0035752	0.0198727	0.4391851	1125922078	1702018182
15	368	0.0888889	0.0046381	0.0002614	0.0025466	0.0146405	0.5914984	1204935802	1709990123
15	369	0.1878532	0.0183007	0.0010256	0.0045651	0.0219005	0.4753142	1097558974	1757107692
15	370	0.1738455	0.0243297	0.0017447	0.0069068	0.0249620	0.5225050	1214420408	1777261224
15	371	0.1102003	0.0074889	0.0006325	0.0026565	0.0206114	0.4531984	1061260215	1782189247
15	372	0.1152902	0.0195492	0.0008117	0.0017994	0.0180138	0.4408000	1336122195	180298005
15	373	0.1139700	0.0265024	0.0030512	0.0045768	0.0208694	0.6227568	2703508728	182436409
15	374	0.1514686	0.0248419	0.0001921	0.0001441	0.0371349	0.3411765	2441795918	1842771429
15	375	0.1889288	0.0300268	0.0026584	0.0041280	0.0221176	0.4838473	2609812632	1842128421
15	376	0.2600185	0.0141329	0.0000543	0.0021400	0.0204660	0.4309054	1167130194	1853817175
15	377	0.0841366	0.0167003	0.0000000	0.0000733	0.0252764	0.4438947	1323380062	185705919
15	378	0.1864512	0.0193049	0.0002020	0.0057393	0.0166793	0.4742574	1123317597	1875416309
15	379	0.1111975	0.0039216	0.0017393	0.0057797	0.0208718	0.5396424	1036884298	1886559229
15	380	0.3295054	0.0093874	0.0007113	0.0028640	0.0278254	0.5333708	118399284	1898465394
15	381	0.1249734	0.0120839	0.0001976	0.0013680	0.0166135	0.4339261	106248062	1906465116
15	382	0.0960336	0.0085266	0.0007507	0.0031485	0.0185546	0.4833389	1028537143	1912791429
15	383	0.4282007	0.0112951	0.0005849	0.0039216	0.0311007	0.5291234	1114758403	1917228992
15	384	0.1643817	0.0160732	0.0009621	0.0016314	0.0170562	0.5339085	1067504	1926893333
15	385	0.1164367	0.0266521	0.0008230	0.0008957	0.0274994	0.4336238	1209780864	1934243827
15	386	0.2254166	0.0230879	0.0004502	0.0006839	0.0221357	0.4186902	1092843267	1936415011
15	387	0.1110289	0.0251819	0.0037407	0.0003042	0.0268919	0.4572944	2585	1952031447
15	388	0.2726293	0.0171518	0.0020210	0.0047313	0.0272569	0.5887372	1115923208	1950174061
15	389	0.1021407	0.0207112	0.0005756	0.0067998	0.0234335	0.4943095	1810874618	1963333333
15	390	0.1097531	0.0208106	0.0011519	0.0008131	0.0175073	0.5145979	1230431965	1967686825
15	391	0.0922634	0.0237299	0.0038965	0.0084445	0.0211364	0.5218067	2652667732	1970453674
15	392	0.1133936	0.0118346	0.0010306	0.0016420	0.0176776	0.5249836	109313363	1975378619
15	393	0.1387237	0.0123816	0.0000000	0.0000734	0.0165822	0.3562899	1060048689	2000872659
15	394	0.0669423	0.0459187	0.0010524	0.0000752	0.0296686	0.4344296	2545884984	200114377
15	395	0.1113690	0.0120812	0.0002990	0.0009144	0.0186406	0.4647850	1042829596	204306278
15	396	0.1987002	0.0045881	0.0001111	0.0059212	0.0210409	0.5272788	1085951841	2047847025
15	397	0.1734855	0.0127744	0.0011999	0.0093796	0.0201054	0.4145888	1074089552	2061914179
15	398	0.1224314	0.0129127	0.0022317	0.0034082	0.0215615	0.4259893	9575927273	2067285455
15	399	0.1816132	0.0193495	0.0007749	0.0076905	0.0278971	0.5667371	1002994012	2070628743
15	400	0.2726655	0.0049796	0.0001165	0.0011551	0.0242865	0.4272471	103119802	2074316832
15	401	0.0457421	0.0204236	0.0010448	0.0000572	0.0211393	0.3998140	1904572993	2069007299
15	402	0.1092230	0.0141556	0.0038657	0.0047372	0.0203005	0.5149545	9906296296	2084558405
15	403	0.1392871	0.0071511	0.0032295	0.0010545	0.0221234	0.4841435	9707787115	2087607843
15	404	0.1716117	0.0137794	0.0042771	0.0150183	0.0287761	0.4616139	1021379121	2094208791
15	405	0.1207457	0.0141420	0.0022249	0.0034238	0.0199025	0.5683633	1003023316	2122590674
15	406	0.1476398	0.0133769	0.0004793	0.0034858	0.0184314	0.4302397	1078859259	2127.6
15	407	0.0930964	0.0208333	0.0035948	0.0318900	0.0313453	0.3432053	1876677083	215790625
15	408	0.1371554	0.0271026	0.0045088	0.0073554	0.0232607	0.4952125	981248731	216219797
15	409	0.1970241	0.0098647	0.0014836	0.0062120	0.0259327	0.4844005	9846482301	2218066372
15	410	0.1271357	0.0290373	0.0023451	0.0046409	0.0206030	0.4898217	1421650754	2416201005
15	411	0.0073827	0.0026197	0.0071287	0.0038739	0.0078431	0.5953640	2901866397	2760534413
15	412	0.0850240	0.0117547	0.0052521	0.0096539	0.0119548	0.4359144	1480117347	2767640306
15	413	0.0990248	0.0055711	0.0061106	0.0173669	0.0156552	0.5363316	6637037037	2839592593
16	1	0.1915200	0.0308530	0.0008379	0.0038881	0.0316575	0.4960282	9947350427	1257410256
16	2	0.0818462	0.0199940	0.0090980	0.0160121	0.0138763	0.6102323	2672747692	1262870769
16	3	0.1175179	0.0164495	0.0036163	0.0149935	0.0186568	0.4487261	2723982036	1274871257
16	4	0.2478451	0.0055232	0.0001262	0.0111143	0.0211609	0.5991167	274745297	128189604
16	5	0.1460153	0.0209880	0.0006901	0.0135824	0.0239502	0.6291509	2553695279	1285929185
16	6	0.1196955	0.0156972	0.0023223	0.0057619	0.0175375	0.6665024	2677167598	1286793296
16	7	0.1572737	0.0147273	0.0054285	0.0172104	0.0177584	0.4157890	2660056769	1288707424
16	8	0.1138225	0.0190692	0.0017669	0.0154924	0.0187567	0.6267507	2719343407	1288684066
16	9	0.2072184	0.0140907	0.0008266	0.0045463	0.0274510	0.5951557	2754808824	1298786765
16	10	0.1401307	0.0146115	0.0019971	0.0105664	0.0186275	0.6385040	2727.65	1304731481
16	11	0.1015323	0.0218413	0.0004545	0.0049085	0.0187768	0.6317881	2537437086	1302559603
16	12	0.1047010	0.0075996	0.0001827	0.0008282	0.0185118	0.6422969	2552319876	1305534161
16	13	0.0708029	0.0089747	0.0017364	0.0048971	0.0165837	0.4246415	2679049751	1318830846
16	14	0.1369842	0.0291654	0.0061704	0.0247579	0.0232310	0.5978206	2705892035	1318499115
16	15	0.1801825	0.0079899	0.0005452	0.0041418	0.0190836	0.6777079	2767032086	1329264706
16	16	0.1071364	0.0181625	0.0037728	0.0150592	0.0189702	0.4894734	2725466125	1331365854
16	17	0.1191063	0.0202462	0.0019425	0.0091199	0.0203283	0.5585226	2754109302	1335674419
16	18	0.1157463	0.0185074	0.0020608	0.0026010	0.0211685	0.5153862	254747449	1343668367
16	19	0.1179577	0.0133566	0.0012619	0.0099107	0.0213842	0.4841487	2697636139	1344767327
16	20	0.5854218	0.0113954	0.0006952	0.0119277	0.0352072	0.5901363	2779828255	1346304709
16	21	0.1392824	0.0176960	0.0067583	0.0196701	0.0228180	0.4548753	2822600907	1347072562
16	22	0.0941942	0.0113817	0.0033241	0.0083027	0.0181832	0.4949295	2658324219	1355714844
16	23	0.0966725	0.0281554	0.0052358	0.0146034	0.0174105	0.4787888	273561126	1355981233
16	24	0.1411004	0.0228668	0.0088317	0.0151105	0.0191407	0.4770626	2767368421	1360440443
16	25	0.1196766	0.0253164	0.0055225	0.0204245	0.0221710	0.4788923	2573837113	1362975258
16	26	0.1314879	0.0262866	0.0036250	0.0114791	0.0216730	0.4017905	2599266106	1369134454
16	27	0.1193806	0.0195339	0.0033719	0.0188785	0.0187199	0.5295069	2695199461	1371218329
16	28	0.1475509	0.0157832	0.0009618	0.0085887	0.0220234	0.5481548	2857106464	137519962
16	29	0.0928048	0.0167775	0.0047059	0.0153282	0.0165388	0.3462575	2667265217	1376091304
16	30	0.1012231	0.0317608	0.0040381	0.0093574	0.0168511	0.5604349	2743867987	1379716172
16	31	0.1170046	0.0143096	0.0036128	0.0136921	0.0189487	0.5910138	2712204255	1386708511
16	32	0.0837877	0.0104615	0.0002511	0.0003706	0.0148254	0.4254304	2770695122	1388036585
16	33	0.1198446	0.0215868	0.0118376	0.0215140	0.0196685	0.4610332	8514272446	1392049536
16	34	0.1135515	0.0147001	0.0012646	0.0143636	0.0211161	0.4399930	2795097633	1393097633
16	35	0.1666481	0.0137739	0.0006251	0.0040034	0.0213714	0.4498419	283213852	1396656546
16	36	0.1242175	0.0277200	0.0034146	0.0098091	0.0221946	0.5427596	2519269129	1397783641
16	37	0.1285979	0.0178051	0.0004574	0.0070965	0.0225272	0.6294488	2862101201	1395457976
16	38	0.0996341	0.0350189	0.0018763	0.0069425	0.0172937	0.3770898	2543920255	1401910686
16	39	0.0816033	0.0067779	0.0012309	0.0052472	0.0168304	0.4590524	2758826962	1408082495
16	40	0.1854248	0.0045425	0.0010621	0.0064052	0.0293301	0.4537909	5438333333	1408354167
16	41	0.1468702	0.0278458	0.0000526	0.0014300	0.0254946	0.5326227	7114205817	1406147651
16	42	0.0110484	0.0039216	0.0052441	0.0016990	0.0078431	0.7224870	1724156909	1406946136
16	43	0.2359892	0.0171076	0.0000726	0.0178442	0.0299927	0.5156448	7305873016	1410177249
16	44	0.1333413	0.0092692	0.0000079	0.0048247	0.0215884	0.6206219	2804846465	1410248485
16	45	0.0116909	0.0039216	0.0059667	0.0055345	0.0078431	0.5936960	170447043	1411155914
16	46	0.1477859	0.0308952	0.0016744	0.0118308	0.0239627	0.5581993	285040824	1416749064
16	47	0.1205132	0.0122407	0.0020591	0.0080397	0.0193647	0.5605463	2874934037	1413676781
16	48	0.1230708	0.0195604	0.0000791	0.0007274	0.0183744	0.4777356	6529153226	1416657258
16	49	0.1976756	0.0115829	0.0034281	0.0091157	0.0242176	0.5112713	7525364238	1417327815
16	50	0.1104644	0.0242449	0.0035088	0.0126316	0.0174888	0.2491916	2524119298	1415614035
16	51	0.1054327	0.0100537	0.0020982	0.0057075	0.0179343	0.5450731	2707328025	1418538217
16	52	0.0855144	0.0200767	0.0033532	0.0070901	0.0166951	0.4877380	2736445652	1418847826
16	53	0.0730306	0.0126837	0.0043786	0.0258440	0.0163694	0.5103347	2893185464	1414558897
16	54	0.0877359	0.0310361	0.0033749	0.0105662	0.0191452	0.3600694	2441343164	1419273458
16	55	0.1210953	0.0147126	0.0022786	0.0027316	0.0205815	0.7022989	2826562069	1419194828
16	56	0.0832917	0.0243137	0.0007962	0.0073916	0.0171836	0.5016875	2543806061	1422163636
16	57	0.1076314	0.0086072	0.0003682	0.0011783	0.0206941	0.5301022	2789274648	1428612676
16	58	0.2980660	0.0180927	0.0041087	0.0084492	0.0347326	0.5991177	7209568182	1434075
16	59	0.0948494	0.0186932	0.0031670	0.0104728	0.0190019	0.4965986	2530924198	1437390671
16	60	0.1085088	0.0373862	0.0018204	0.0029525	0.0223973	0.6588507	2632438799	1444286374
16	61	0.0837912	0.0147275	0.0030490	0.0076130	0.0178724	0.3936910	275395599	1445919315
16	62	0.1077015	0.0158606	0.0024510	0.0021351	0.0185730	0.6803486	2834272222	1440136111
16	63	0.1377999	0.0288933	0.0011698	0.0062612	0.0218212	0.7601130	2857374576	1440086441
16	64	0.1518341	0.0091284	0.0031992	0.0076555	0.0253307	0.5643869	7359712919	1442083732
16	65	0.1881672	0.0149078	0.0019267	0.0067825	0.0197343	0.6112976	2338109181	1442307692
16	66	0.0782563	0.0175420	0.0003676	0.0055847	0.0154412	0.4200105	2803330357	1448683036
16	67	0.2137255	0.0173861	0.0035104	0.0094877	0.0254507	0.5347170	6995181452	1453915323
16	68	0.0930992	0.0075505	0.0025871	0.0086977	0.0174188	0.5238279	2171561194	1450238806
16	69	0.0911238	0.0191500	0.0017951	0.0075058	0.0182464	0.6795639	2884175115	144624424
16	70	0.0564581	0.0173918	0.0041332	0.0060629	0.0132088	0.5100405	2708	1451673016
16	71	0.0964093	0.0111226	0.0071220	0.0275004	0.0188867	0.4933966	2572826196	145936272
16	72	0.1245265	0.0156461	0.0040822	0.0102389	0.0240782	0.5360102	2234617747	1457324232
16	73	0.1129057	0.0195669	0.0029924	0.0064084	0.0177905	0.4269864	2414271777	1457700348
16	74	0.0630396	0.0169108	0.0024490	0.0156708	0.0150508	0.4569635	2687075099	1458252964
16	75	0.1295113	0.0232408	0.0018115	0.0074052	0.0202548	0.5705186	2621888325	1460895939
16	76	0.0609856	0.0157608	0.0011332	0.0041751	0.0138373	0.4580034	2737174905	146078327
16	77	0.0562146	0.0053152	0.0001296	0.0070329	0.0138389	0.5023011	2827768595	1459710744
16	78	0.1561790	0.0170739	0.0009653	0.0033384	0.0219809	0.3884967	2847871795	1462128205
16	79	0.0652871	0.0347671	0.0045416	0.0052856	0.0169573	0.4427343	2366086957	1460988142
16	80	0.0552535	0.0190696	0.0000549	0.0016257	0.0179052	0.4640303	8916190476	1464661064
16	81	0.0975680	0.0227552	0.0071362	0.0052007	0.0196752	0.4820837	2184841202	1465618026
16	82	0.1288344	0.0284855	0.0085288	0.0052328	0.0218934	0.6597498	2167858896	1467441718
16	83	0.1116982	0.0111111	0.0013183	0.0073003	0.0182453	0.4945386	2538163842	1468429379
16	84	0.0923064	0.0179960	0.0002326	0.0008308	0.0200066	0.3513127	2401555085	1474635593
16	85	0.1333534	0.0260935	0.0076018	0.0121368	0.0227049	0.5932931	2858705128	1476623077
16	86	0.1060760	0.0208908	0.0043331	0.0055354	0.0193658	0.5932220	2237228395	1476930041
16	87	0.0741784	0.0176747	0.0017122	0.0110283	0.0157047	0.4429716	2795502347	1476286385
16	88	0.1355535	0.0210707	0.0017533	0.0129785	0.0196078	0.5975101	262602381	1479862434
16	89	0.1270521	0.0250237	0.0008654	0.0103989	0.0202231	0.5806423	2492418966	1485756897
16	90	0.0895968	0.0142451	0.0049532	0.0078962	0.0165965	0.6206925	2837945841	148583559
16	91	0.0703995	0.0164493	0.0018213	0.0060300	0.0203872	0.4885307	903248954	1484058577
16	92	0.1095917	0.0168916	0.0044648	0.0031831	0.0170189	0.6353790	2817045455	1489571429
16	93	0.0728011	0.0380532	0.0001961	0.0010504	0.0207563	0.5064426	8744428571	1488725
16	94	0.1067318	0.0239612	0.0022793	0.0084307	0.0219580	0.6185744	2266577617	1487608303
16	95	0.0882353	0.0146877	0.0001271	0.0215505	0.0226761	0.4590777	2726888889	1492546296
16	96	0.1151285	0.0140654	0.0024488	0.0092810	0.0211329	0.6118257	7563555556	1492377778
16	97	0.1124080	0.0215429	0.0032525	0.0064845	0.0226339	0.3982811	2408824147	149339895
16	98	0.0680253	0.0148526	0.0028099	0.0079667	0.0165818	0.5255056	2596185039	1492531496
16	99	0.1249752	0.0126230	0.0097577	0.0367333	0.0396910	0.5090513	221696633	1493107744
16	100	0.1586606	0.0206214	0.0004947	0.0010618	0.0295385	0.6029321	7283630769	1496406154
16	101	0.0973207	0.0329801	0.0049568	0.0084886	0.0168067	0.5573499	2366090062	1496375776
16	102	0.0872578	0.0239524	0.0022523	0.0081747	0.0179043	0.4669068	2578067055	1496924198
16	103	0.0920510	0.0270420	0.0027239	0.0039800	0.0203162	0.5553073	2250184358	1497569832
16	104	0.1172645	0.0421489	0.0061135	0.0136219	0.0221425	0.5486848	2668632114	1498674797
16	105	0.1320998	0.0607935	0.0043450	0.0116727	0.0215594	0.4532266	2556910798	1502920188
16	106	0.0827431	0.0195883	0.0052483	0.0015803	0.0160570	0.4497903	2766542289	1500034826
16	107	0.1159420	0.0405797	0.0039015	0.0084449	0.0206910	0.4782107	2341214834	1504429668
16	108	0.0669468	0.0376174	0.0036579	0.0015818	0.0218817	0.4495634	8648781513	1506046218
16	109	0.1470338	0.0178025	0.0017451	0.0090467	0.0225365	0.3974425	2515644501	1504611253
16	110	0.1167707	0.0193942	0.0028809	0.0103735	0.0218096	0.4947201	2634554469	1507928771
16	111	0.2451113	0.0298215	0.0050672	0.0122846	0.0230447	0.6301829	5792786517	1508355056
16	112	0.1336953	0.0156139	0.0019548	0.0075415	0.0194389	0.4799638	2541538462	1510347692
16	113	0.1225172	0.0292065	0.0032420	0.0053515	0.0175409	0.5448149	2318700361	1503593863
16	114	0.2704445	0.0044349	0.0009445	0.0011498	0.0235910	0.3578893	6688900524	1511465969
16	115	0.1122954	0.0140774	0.0030948	0.0050388	0.0220211	0.5584828	7242307692	1510905983
16	116	0.1468499	0.0156863	0.0062379	0.0100935	0.0221220	0.5207110	2728753271	1510753271
16	117	0.1469587	0.0158276	0.0047695	0.0022729	0.0175823	0.5736560	6225195195	1512897898
16	118	0.0879851	0.0122185	0.0004306	0.0071566	0.0269041	0.4372375	1933373887	1513688427
16	119	0.0994880	0.0385038	0.0029100	0.0105782	0.0217310	0.5459223	2574834395	1513089172
16	120	0.1450478	0.0330191	0.0039844	0.0102438	0.0228632	0.6068628	2294967949	1516785256
16	121	0.1293935	0.0191870	0.0065929	0.0076358	0.0191748	0.6165035	1565595645	1519975117
16	122	0.0870007	0.0177802	0.0037279	0.0056282	0.0171508	0.4015009	223370679	1519373457
16	123	0.1274396	0.0188844	0.0010356	0.0077137	0.0205825	0.5108700	2497347573	1512798058
16	124	0.0930968	0.0175271	0.0030458	0.0130143	0.0196134	0.5262768	2893165007	1521467994
16	125	0.1451402	0.0287497	0.0048830	0.0104997	0.0204849	0.6009446	2279335484	1523193548
16	126	0.0897624	0.0314925	0.0046967	0.0126597	0.0174671	0.4934718	2654207059	1521392941
16	127	0.0672105	0.0196651	0.0050570	0.0070226	0.0161920	0.5743715	2675445255	1522284672
16	128	0.0497703	0.0150767	0.0027023	0.0070697	0.0132114	0.5555889	2837958237	1522327146
16	129	0.0718290	0.0122078	0.0027695	0.0084635	0.0178354	0.4594882	2792468927	1521853107
16	130	0.1277142	0.0236610	0.0089814	0.0046848	0.0217134	0.6103764	2204325503	1528263423
16	131	0.1938840	0.0220910	0.0008925	0.0010132	0.0222957	0.5185343	589914324	1540531459
16	132	0.1010381	0.0231834	0.0041208	0.0067631	0.0214847	0.5581944	2688248663	1535553476
16	133	0.0758995	0.0190367	0.0038835	0.0099181	0.0168856	0.3348944	2606543689	1538703883
16	134	0.1108297	0.0253786	0.0024283	0.0087224	0.0226223	0.4695904	2513670819	1533403915
16	135	0.0945385	0.0289048	0.0027738	0.0053372	0.0196270	0.4580775	253537561	1538834146
16	136	0.0864475	0.0138601	0.0015186	0.0034794	0.0142253	0.4031526	5060196078	1540789216
16	137	0.1008378	0.0233333	0.0023529	0.0057041	0.0177362	0.3985205	1480986364	1542404545
16	138	0.0558194	0.0107034	0.0022486	0.0189602	0.0262997	0.4197877	2907623853	1539376147
16	139	0.0523717	0.0086649	0.0017157	0.0058175	0.0137543	0.5186130	7345238971	1541341912
16	140	0.0924569	0.0126033	0.0026473	0.0097834	0.0188761	0.6230690	1772339623	1544201258
16	141	0.0985593	0.0160142	0.0034249	0.0098812	0.0281303	0.6197625	225432736	1545322581
16	142	0.1195757	0.0318065	0.0013340	0.0083896	0.0214240	0.3210383	2409696721	153792623
16	143	0.0930840	0.0087596	0.0038683	0.0083760	0.0194800	0.5207960	2774222826	1549123641
16	144	0.0911394	0.0144985	0.0024281	0.0057644	0.0238962	0.5412289	2480193764	1545670379
16	145	0.1676773	0.0092425	0.0002246	0.0005874	0.0252915	0.3481040	6602422907	1547709251
16	146	0.1545528	0.0226162	0.0018533	0.0105829	0.0215821	0.5967902	7718356164	1547544521
16	147	0.0542228	0.0084566	0.0028189	0.0087706	0.0141892	0.6412897	2666160149	1549316574
16	148	0.1785123	0.0348576	0.0051044	0.0103848	0.0230084	0.6026261	1563842011	1542556553
16	149	0.0811213	0.0204454	0.0015864	0.0068677	0.0181890	0.4861957	1626105528	1546575377
16	150	0.2294006	0.0166555	0.0012032	0.0016934	0.0273730	0.6092246	78815625	1551767045
16	151	0.1382135	0.0073348	0.0024110	0.0145534	0.0193319	0.4766594	281732963	1550.4
16	152	0.1013144	0.0080299	0.0040796	0.0098542	0.0205272	0.4182863	2791630037	1556934066
16	153	0.1153936	0.0323968	0.0028534	0.0074627	0.0229587	0.4379280	2690022388	1551988806
16	154	0.0752904	0.0194517	0.0018735	0.0015521	0.0187354	0.5536208	2323955504	1551941452
16	155	0.2044364	0.0156863	0.0000000	0.0004053	0.0376712	0.4239128	6846340782	1553712291
16	156	0.1634961	0.0290236	0.0037905	0.0203186	0.0268108	0.7044408	2205330334	155196144
16	157	0.1472026	0.0159085	0.0025490	0.0025882	0.0168497	0.4648497	1499.48	1554623333
16	158	0.0817591	0.0226779	0.0042577	0.0138487	0.0172885	0.4746891	2597934286	1556802857
16	159	0.0742617	0.0139336	0.0029612	0.0046259	0.0173750	0.5057463	2621402041	1557514286
16	160	0.2735666	0.0076115	0.0009763	0.0083230	0.0143460	0.4670803	1437109705	1561025316
16	161	0.1255536	0.0132010	0.0018657	0.0017108	0.0258598	0.6229380	1794980251	155981149
16	162	0.0481137	0.0173196	0.0051040	0.0060057	0.0141211	0.5635065	1623529284	1566075922
16	163	0.0298851	0.0057997	0.0033957	0.0051236	0.0093457	0.3858613	2897521073	156397318
16	164	0.1664376	0.0225124	0.0024739	0.0050760	0.0230346	0.6382170	7458294393	1561663551
16	165	0.1818657	0.0150002	0.0000312	0.0039450	0.0289011	0.6353565	7717733598	1564831014
16	166	0.0679219	0.0084058	0.0019132	0.0066831	0.0167251	0.5551314	2498108168	1565390728
16	167	0.1328526	0.0346869	0.0042252	0.0063125	0.0251739	0.5162808	2183248387	1567177419
16	168	0.0438488	0.0064832	0.0010120	0.0048861	0.0137413	0.3736085	2472495968	1563532258
16	169	0.1789382	0.0268174	0.0047419	0.0329799	0.0347339	0.4482660	8047891156	1567746599
16	170	0.1366187	0.0414136	0.0022442	0.0018278	0.0204523	0.5478744	1464631268	1570551622
16	171	0.0856703	0.0123249	0.0024606	0.0047015	0.0198166	0.5232273	199052381	1569994398
[truncated: 19,802 more rows]

## Sheet: ImageMetaData
	Patient	type	Breslow	Ulc	Mitoses	BriskStatus	Count_Lymphocytes	Brisk	CoreNumber	Activation	S	N	Status	NCores	Regression	RegressionStatus
1	1	ssmm	0.22	0	0	BRISK	1098	BRISK	3	0.118759	0.185796	1098	Active	2	EARLY REGRESSION	REGRESSION
2	10	ssmm	0.42	0	0	BRISK	787	BRISK	25	0.0313235	0.0964623	787	Active	2	NA	NA
3	18	ssmm	0.93	+	0	BRISK	904	BRISK	40	0.175507	0.163671	904	Active	1	NO REGRESSION	NO REGRESSION
4	22	ssmm	1.13	+	1=6	BRISK	962	BRISK	50	-0.027882	0.143691	962	Exhausted	1	NO REGRESSION	NO REGRESSION
5	28	ssmm	2.72	+	>6	BRISK	351	BRISK	64	-0.0927262	0.128338	351	Exhausted	1	NA	NA
6	31	ssmm	0.7	0	0	BRISK	1531	BRISK	75	0.000548647	0.103913	1531	Transition	1	EARLY REGRESSION	REGRESSION
7	31	ssmm	0.7	0	0	BRISK	282	BRISK	76	-0.0714287	0.127427	282	Exhausted	2	NA	NA
8	31	ssmm	0.7	0	0	BRISK	356	BRISK	77	-0.0700904	0.0870915	356	Exhausted	3	NA	NA
9	31	ssmm	0.7	0	0	BRISK	357	BRISK	78	-0.0550746	0.0948278	535	Exhausted	4	NA	NA
10	2	ssmm	0.71	0	1=6	NON BRISK IN NON BRISK	87	NONBRISK	5	0.0964146	0.108019	87	Active	1	NA	NA
11	3	ssmm	2.5	0	1=6	NON BRISK IN NON BRISK	343	NONBRISK	9	-0.0131501	0.120554	343	Transition	1	NO REGRESSION	NO REGRESSION
12	3	ssmm	2.5	0	1=6	NON BRISK IN NON BRISK	140	NONBRISK	11	0.0394398	0.139126	140	Transition	2	NO REGRESSION	NO REGRESSION
13	4	ssmm	0.26	0	0	NON BRISK IN NON BRISK	959	NONBRISK	13	-0.00328685	0.173104	959	Transition	1	NO REGRESSION	NO REGRESSION
14	5	ssmm	1.73	0	>6	NON BRISK IN NON BRISK	497	NONBRISK	16	-0.0069769	0.144018	497	Transition	2	NO REGRESSION	NO REGRESSION
15	8	ssmm	0.31	0	1=6	NON BRISK IN NON BRISK	74	NONBRISK	22	-0.130388	0.143625	74	Exhausted	1	NO REGRESSION	NO REGRESSION
16	14	ssmm	0.75	0	0	NON BRISK IN NON BRISK	121	NONBRISK	34	0.128914	0.152311	121	Active	3	NA	NA
17	15	ssmm	0.35	0	0	NON BRISK IN NON BRISK	128	NONBRISK	35	-0.225209	0.144094	128	Exhausted	1	NO REGRESSION	NO REGRESSION
18	16	ssmm	0.28	0	0	NON BRISK IN NON BRISK	155	NONBRISK	36	0.0365077	0.173076	155	Transition	1	NO REGRESSION	NO REGRESSION
19	17	ssmm	0.36	0	0	NON BRISK IN NON BRISK	67	NONBRISK	37	0.0674433	0.232093	67	Transition	1	NO REGRESSION	NO REGRESSION
20	19	lmm	0.37	0	1=6	NON BRISK IN NON BRISK	291	NONBRISK	42	-0.00621454	0.0896001	291	Transition	1	NO REGRESSION	NO REGRESSION
21	20	ssmm	0.67	0	1=6	NON BRISK IN NON BRISK	121	NONBRISK	43	-0.0593553	0.1285	121	Exhausted	1	NO REGRESSION	NO REGRESSION
22	20	ssmm	0.67	0	1=6	NON BRISK IN NON BRISK	595	NONBRISK	44	-0.0552164	0.115919	595	Exhausted	2	NO REGRESSION	NO REGRESSION
23	20	ssmm	0.67	0	1=6	NON BRISK IN NON BRISK	908	NONBRISK	46	-0.000567247	0.100178	908	Transition	4	NO REGRESSION	NO REGRESSION
24	21	ssmm	0.5	0	0	NON BRISK IN NON BRISK	347	NONBRISK	48	-0.133161	0.118991	347	Exhausted	1	NA	NA
25	23	ssmm	0.78	0	0	NON BRISK IN NON BRISK	62	NONBRISK	51	-0.00663769	0.136877	62	Transition	1	NO REGRESSION	NO REGRESSION
26	23	ssmm	0.78	0	0	NON BRISK IN NON BRISK	52	NONBRISK	52	-0.0174205	0.0853354	52	Transition	2	NO REGRESSION	NO REGRESSION
27	23	ssmm	0.78	0	0	NON BRISK IN NON BRISK	140	NONBRISK	53	-0.00676692	0.162722	140	Transition	3	NO REGRESSION	NO REGRESSION
28	24	ssmm	1.125	0	1=6	NON BRISK IN NON BRISK	424	NONBRISK	55	-0.0270784	0.0832832	424	Exhausted	2	NA	NA
29	24	ssmm	1.125	0	1=6	NON BRISK IN NON BRISK	74	NONBRISK	56	0.0335708	0.237977	74	Transition	3	NA	NA
30	25	nmm	2.72	+	>6	NON BRISK IN NON BRISK	155	NONBRISK	57	0.0434729	0.100994	155	Active	1	NO REGRESSION	NO REGRESSION
31	25	nmm	2.72	+	>6	NON BRISK IN NON BRISK	160	NONBRISK	58	-0.0298123	0.114068	160	Exhausted	2	NO REGRESSION	NO REGRESSION
32	26	ssmm	0.66	0	1=6	BRISK IN NON BRISK	171	NONBRISK	60	0.144993	0.155183	171	Active	1	NO REGRESSION	NO REGRESSION
33	26	ssmm	0.66	0	1=6	BRISK IN NON BRISK	11	NONBRISK	61	0.0232086	0.161729	11	Transition	2	NO REGRESSION	NO REGRESSION
34	27	ssmm	0.78	0	0	BRISK IN NON BRISK	290	NONBRISK	62	0.0160511	0.0945499	290	Transition	1	NA	NA
35	30	nmm	1.72	0	>6	BRISK IN NON BRISK	20	NONBRISK	68	-0.150391	0.0897967	20	Exhausted	1	NO REGRESSION	NO REGRESSION
36	30	nmm	1.72	0	>6	BRISK IN NON BRISK	9	NONBRISK	69	-0.0810495	0.094331	9	Transition	2	NO REGRESSION	NO REGRESSION
37	30	nmm	1.72	0	>6	BRISK IN NON BRISK	326	NONBRISK	70	0.035994	0.11871	326	Active	3	NO REGRESSION	NO REGRESSION
38	30	nmm	1.72	0	>6	BRISK IN NON BRISK	384	NONBRISK	71	0.0816123	0.111711	384	Active	4	NO REGRESSION	NO REGRESSION
39	4	ssmm	0.26	0	0	BRISK IN NON BRISK	316	NONBRISK	14	-0.00666284	0.164124	316	Transition	2	NO REGRESSION	NO REGRESSION
40	5	ssmm	1.73	0	>6	BRISK IN NON BRISK	413	NONBRISK	15	-7.15568e-05	0.170892	413	Transition	1	NO REGRESSION	NO REGRESSION
41	7	ssmm	0.51	0	0	BRISK IN NON BRISK	353	NONBRISK	20	-0.0251688	0.167458	353	Exhausted	1	NO REGRESSION	NO REGRESSION
42	7	ssmm	0.51	0	0	BRISK IN NON BRISK	274	NONBRISK	21	-0.00874009	0.160163	274	Transition	2	NO REGRESSION	NO REGRESSION
43	9	ssmm	7.2	0	>6	BRISK IN NON BRISK	871	NONBRISK	23	0.0271867	0.0981071	871	Active	1	NO REGRESSION	NO REGRESSION
44	14	ssmm	0.75	0	0	BRISK IN NON BRISK	462	NONBRISK	32	0.0806753	0.15515	462	Active	1	EARLY REGRESSION	REGRESSION
45	14	ssmm	0.75	0	0	BRISK IN NON BRISK	476	NONBRISK	33	0.103754	0.146146	476	Active	2	NA	NA
46	20	ssmm	0.67	0	1=6	BRISK IN NON BRISK	278	NONBRISK	45	-0.0271277	0.0826983	278	Exhausted	3	NO REGRESSION	NO REGRESSION
47	20	ssmm	0.67	0	1=6	BRISK IN NON BRISK	441	NONBRISK	47	-0.0248761	0.110622	441	Exhausted	5	NO REGRESSION	NO REGRESSION
48	24	ssmm	1.125	0	1=6	BRISK IN NON BRISK	410	NONBRISK	54	-0.0310783	0.112277	410	Exhausted	1	EARLY REGRESSION	REGRESSION
49	1	ssmm	0.22	0	0	NA	222	NA	1	0.111676	0.135669	222	Active	1	LATE REGRESSION	REGRESSION
50	2	ssmm	0.71	0	1=6	NA	138	NA	8	0.135278	0.0714093	138	Active	2	LATE REGRESSION	REGRESSION
51	6	ssmm	0.3	0	0	NA	222	NA	19	-0.214568	0.209917	222	Exhausted	1	EARLY REGRESSION	REGRESSION
52	10	ssmm	0.42	0	0	NA	12	NA	24	0.0446345	0.0663522	12	Transition	1	LATE REGRESSION	REGRESSION
53	12	lmm	0.42	0	0	NA	109	NA	27	0.2069	0.195441	109	Active	1	LATE REGRESSION	REGRESSION
54	12	lmm	0.42	0	0	NA	123	NA	28	0.257818	0.211	123	Active	2	NA	NA
55	17	ssmm	0.36	0	0	NA	549	NA	39	0.0345085	0.151094	549	Active	2	NO REGRESSION	NO REGRESSION
56	21	ssmm	0.5	0	0	NA	270	NA	49	-0.324121	0.269117	270	Exhausted	2	EARLY REGRESSION	REGRESSION
57	28	ssmm	2.72	+	>6	NA	126	NA	65	0.0245822	0.168182	126	Transition	2	LATE REGRESSION	REGRESSION
58	29	ssmm	0.66	0	0	NA	214	NA	66	0.0164048	0.16222	214	Transition	1	EARLY REGRESSION	REGRESSION
59	29	nmm	1.72	0	>6	NA	358	NA	67	0.0197779	0.118295	358	Transition	2	EARLY REGRESSION	REGRESSION
60	27	ssmm	0.78	0	0	NA	139	NA	74	-0.0635514	0.142329	139	Exhausted	2	NA	NA

## Sheet: ImageLegend
ImageNumber	CoreNumber
1	10
2	11
3	12
4	13
5	14
6	15
7	16
8	17
9	18
10	19
11	1
12	20
13	21
14	22
15	23
16	24
17	25
18	26
19	27
20	28
21	29
22	2
23	30
24	31
25	32
26	33
27	34
28	35
29	36
30	37
31	38
32	39
33	3
34	40
35	41
36	42
37	43
38	44
39	45
40	46
41	47
42	48
43	49
44	4
45	50
46	51
47	52
48	53
49	54
50	55
51	56
52	57
53	58
54	59
55	5
56	60
57	61
58	62
59	63
60	64
61	65
62	66
63	67
64	68
65	69
66	6
67	70
68	71
69	72
70	73
71	74
72	75
73	76
74	77
75	78
76	79
77	7
78	8
79	9

## Sheet: ImageLegend2
ImageNumber	CoreNumber
1	11
2	13
3	14
4	15
5	16
6	19
7	1
8	20
9	21
10	22
11	23
12	24
13	25
14	26
15	27
16	28
17	31
18	32
19	33
20	34
21	35
22	36
23	37
24	38
25	39
26	3
27	40
28	42
29	43
30	44
31	45
32	46
33	47
34	48
35	49
36	50
37	51
38	52
39	53
40	54
41	55
42	56
43	57
44	58
45	5
46	60
47	61
48	62
49	63
50	64
51	65
52	66
53	67
54	68
55	69
56	70
57	71
58	72
59	74
60	75
61	76
62	77
63	78
64	9
