# Supplementary material for: Functional heterogeneity of lymphocytic patterns in primary melanoma dissected through single-cell multiplexing
Source: eLife. 2020 Feb 14;9:e53008. doi: 10.7554/eLife.53008 (PMC7053517; doi:10.7554/eLife.53008)
Supplement: Supplementary file 1. — The highest spearman correlation was obtained for the predictions. [file elife-53008-supp1.xlsx]

## Sheet: supplementary_table_x1
Predicted cell type	B cells	Cancer Associated Fibroblasts	Macrophages	Natural Killer	T cells	Unknown
B cells memory	262	0	0	0	0	36
B cells naive	117	0	0	0	0	8
Dendritic cells activated	0	0	0	0	0	2
Dendritic cells resting	0	0	1	0	0	1
Eosinophils	0	0	0	0	0	1
Macrophages M0	0	0	4	0	0	1
Macrophages M1	0	0	6	0	0	0
Macrophages M2	0	0	43	0	0	3
Mast cells activated	0	0	0	0	0	1
Mast cells resting	0	0	0	0	0	1
Monocytes	0	0	50	0	0	11
Neutrophils	0	0	0	0	0	3
NK cells activated	1	0	0	33	14	19
NK cells resting	1	0	0	15	2	5
Plasma cells	1	0	0	0	0	1
T cells CD4 memory activated	0	0	0	0	113	3
T cells CD4 memory resting	0	0	0	0	405	24
T cells CD4 naive	0	0	0	0	70	28
T cells CD8	0	0	0	2	869	37
T cells follicular helper	0	1	0	0	267	16
T cells gamma delta	0	0	0	0	2	1
T cells regulatory Tregs	0	0	0	0	11	0
