# Supplementary material for: Functional heterogeneity of lymphocytic patterns in primary melanoma dissected through single-cell multiplexing
Source: eLife. 2020 Feb 14;9:e53008. doi: 10.7554/eLife.53008 (PMC7053517; doi:10.7554/eLife.53008)
Supplement: Supplementary file 2. [file elife-53008-supp2.xlsx]

## Sheet: Sheet1
Protein	Transcription Factor
CD8	CD8A, CD8B
CD69	CD69
OX40	TNFRSF4
LAG3	LAG3
TIM3	HAVCR2
