# Supplementary material for: Functional heterogeneity of lymphocytic patterns in primary melanoma dissected through single-cell multiplexing
Source: eLife. 2020 Feb 14;9:e53008. doi: 10.7554/eLife.53008 (PMC7053517; doi:10.7554/eLife.53008)
Supplement: Supplementary file 3. [file elife-53008-supp3.xlsx]

## Sheet: Sheet1
Gene symbol	CD8 T cells - Active	CD8 T cells - Exhausted
CD69	121.572	30.6054
CD8A	485.769	747.53
CD8B	155.657	185.49
HAVCR2	70.8497	614.261
LAG3	288.544	506.177
TNFRSF4	29.8663	140.821
