# Supplementary material for: Functional heterogeneity of lymphocytic patterns in primary melanoma dissected through single-cell multiplexing
Source: eLife. 2020 Feb 14;9:e53008. doi: 10.7554/eLife.53008 (PMC7053517; doi:10.7554/eLife.53008)
Supplement: Supplementary file 4. [file elife-53008-supp4.xlsx]

## Sheet: supplementary_table_x4
Input Sample	CD8 T cells - Active	CD8 T cells - Exhausted	P-value	Pearson Correlation	Root Mean Square Error
TCGA-3N-A9WB	0	1	0.274725	0.495981	1.07591
TCGA-3N-A9WC	0.612944	0.387056	0	0.988388	0.233611
TCGA-BF-A1PU	0	1	0.527473	0.15143	1.35588
TCGA-BF-A1PV	0	1	0.296703	0.457462	1.11072
TCGA-BF-A1PZ	0.219856	0.780144	0.0659341	0.835316	0.570629
TCGA-BF-A1Q0	0	1	0.043956	0.880327	0.630952
TCGA-BF-A3DM	0	1	0.252747	0.562874	1.01262
TCGA-BF-A5EO	0.239115	0.760885	0.021978	0.909483	0.436036
TCGA-BF-A5EQ	0.463982	0.536018	0	0.961792	0.262121
TCGA-BF-A5ER	0	1	0.285714	0.483934	1.08691
TCGA-BF-A5ES	0	1	0.164835	0.728729	0.83526
TCGA-BF-A9VF	0	1	0.010989	0.954688	0.501159
TCGA-BF-AAOU	0	1	0.032967	0.898217	0.602287
TCGA-BF-AAOX	0.688165	0.311835	0.758242	-0.1799	1.25603
TCGA-BF-AAP1	0	1	0.142857	0.767963	0.787485
TCGA-BF-AAP2	0.471252	0.528748	0	0.985217	0.1866
TCGA-BF-AAP4	0.550093	0.449907	0	0.987986	0.202486
TCGA-BF-AAP7	0.4501	0.5499	0.043956	0.864702	0.460454
TCGA-BF-AAP8	0.603548	0.396452	0.0659341	0.834435	0.509308
TCGA-D3-A1Q3	0.518483	0.481517	0	0.95983	0.275251
TCGA-D3-A1Q5	0.62361	0.37639	0.0659341	0.829838	0.518096
TCGA-D3-A1Q7	0.632065	0.367935	0	0.960657	0.31074
TCGA-D3-A1QA	0.177768	0.822232	0	0.98479	0.29163
TCGA-D3-A2J6	0.493711	0.506289	0.043956	0.871012	0.448531
TCGA-D3-A2J8	0.59877	0.40123	0.010989	0.948392	0.323956
TCGA-D3-A2JF	0.664128	0.335872	0	0.991175	0.25688
TCGA-D3-A2JH	0.669866	0.330134	0	0.992734	0.256605
TCGA-D3-A2JL	0.769168	0.230832	0	0.966792	0.368461
TCGA-D3-A3BZ	0.315068	0.684932	0	0.966685	0.269792
TCGA-D3-A3C6	0	1	0.461538	0.243546	1.28701
TCGA-D3-A3CB	0.62303	0.37697	0	0.960532	0.307205
TCGA-D3-A3CC	0	1	0.296703	0.467795	1.10149
TCGA-D3-A51E	0.346093	0.653907	0	0.983168	0.203308
TCGA-D3-A51R	0	1	0.593407	0.00784617	1.45676
TCGA-D3-A5GL	0	1	0.538462	0.113268	1.38341
TCGA-D3-A5GN	0.421955	0.578045	0	0.958777	0.2702
TCGA-D3-A5GO	0.252974	0.747026	0.010989	0.931638	0.384085
TCGA-D3-A5GU	0.467564	0.532436	0.010989	0.93854	0.320755
TCGA-D3-A8GI	0	1	0.395604	0.33358	1.21593
TCGA-D3-A8GJ	0.719166	0.280834	0.010989	0.931556	0.40097
TCGA-D3-A8GK	0	1	0.296703	0.457121	1.11102
TCGA-D3-A8GM	0	1	0	0.960838	0.488886
TCGA-D3-A8GN	0.711609	0.288391	0	0.99374	0.281674
TCGA-D3-A8GQ	0	1	0.142857	0.764128	0.792282
TCGA-D3-A8GS	0.147215	0.852785	0.175824	0.705058	0.776457
TCGA-D3-A8GV	0	1	0.241758	0.611112	0.964403
TCGA-D9-A4Z5	0	1	0.296703	0.474034	1.09587
TCGA-DA-A1I8	0	1	0.527473	0.150287	1.35671
TCGA-DA-A3F5	0	1	0.241758	0.596041	0.979721
TCGA-DA-A95V	0.546885	0.453115	0	0.974034	0.244638
TCGA-DA-A95X	0	1	0.120879	0.787993	0.761941
TCGA-DA-A95Y	0	1	0.285714	0.494652	1.07713
TCGA-DA-A960	0	1	0.934066	-0.3374	1.67462
TCGA-EB-A1NK	0	1	0.043956	0.865386	0.653929
TCGA-EB-A299	0.378291	0.621709	0	0.96234	0.265183
TCGA-EB-A3HV	0	1	0.241758	0.611463	0.964043
TCGA-EB-A3XB	0	1	0	0.965787	0.478779
TCGA-EB-A3XC	0	1	0.10989	0.791546	0.757319
TCGA-EB-A3XD	0.38772	0.61228	0.032967	0.882756	0.438298
TCGA-EB-A3XE	0.376575	0.623425	0	0.969452	0.243831
TCGA-EB-A3XF	0	1	0.186813	0.700167	0.868389
TCGA-EB-A3Y6	0	1	0	0.961536	0.487472
TCGA-EB-A41A	0.331717	0.668283	0	0.959663	0.284481
TCGA-EB-A41B	0.532546	0.467454	0	0.988131	0.194354
TCGA-EB-A42Y	0	1	0.0549451	0.841468	0.68912
TCGA-EB-A430	0.621761	0.378239	0	0.975205	0.272961
TCGA-EB-A431	0	1	0.252747	0.571888	1.00378
TCGA-EB-A44N	0.616352	0.383648	0.241758	0.592572	0.764435
TCGA-EB-A44O	0	1	0.428571	0.27032	1.26629
TCGA-EB-A44P	0.455407	0.544593	0.010989	0.944627	0.306193
TCGA-EB-A4IS	0.657168	0.342832	0	0.994086	0.244852
TCGA-EB-A4P0	0.321402	0.678598	0	0.99477	0.162404
TCGA-EB-A4XL	0.496277	0.503723	0	0.98737	0.184269
TCGA-EB-A51B	0.549467	0.450533	0	0.993007	0.18413
TCGA-EB-A550	0.254961	0.745039	0.0879121	0.816208	0.583757
TCGA-EB-A553	0	1	0.032967	0.884192	0.62487
TCGA-EB-A5SE	0.430712	0.569288	0.010989	0.929424	0.341749
TCGA-EB-A5SF	0	1	0.615385	-0.0114	1.46972
TCGA-EB-A5UM	0.567177	0.432823	0	0.965628	0.274031
TCGA-EB-A5UN	0.717126	0.282874	0.32967	0.374504	0.929864
TCGA-EB-A6QY	0	1	0.032967	0.883031	0.626702
TCGA-EB-A6QZ	0	1	0.241758	0.593126	0.982657
TCGA-EB-A6R0	0.477575	0.522425	0	0.963363	0.258995
TCGA-EB-A82C	0	1	0.296703	0.475223	1.0948
TCGA-EB-A85I	0.597058	0.402942	0	0.964451	0.287889
TCGA-EB-A85J	0.680348	0.319652	0	0.987092	0.276874
TCGA-EB-A97M	0.241197	0.758803	0.021978	0.907697	0.438556
TCGA-EE-A17X	0	1	0.164835	0.719855	0.845692
TCGA-EE-A17Z	0	1	0.296703	0.479625	1.09082
TCGA-EE-A181	0.466752	0.533248	0	0.979453	0.207261
TCGA-EE-A184	0.487391	0.512609	0	0.996777	0.139446
TCGA-EE-A20B	0.470467	0.529533	0.142857	0.771236	0.589377
TCGA-EE-A20F	0.281604	0.718396	0.010989	0.953112	0.320704
TCGA-EE-A20H	0.257188	0.742812	0.010989	0.944315	0.353277
TCGA-EE-A29B	0	1	0.241758	0.612307	0.963177
TCGA-EE-A29C	0	1	0.285714	0.486274	1.08478
TCGA-EE-A29H	0	1	0.010989	0.940555	0.528288
TCGA-EE-A29M	0.561122	0.438878	0	0.993814	0.187255
TCGA-EE-A29N	0.0381537	0.961846	0.010989	0.93098	0.51709
TCGA-EE-A29P	0.523793	0.476207	0	0.986915	0.195291
TCGA-EE-A29Q	0	1	0.241758	0.59561	0.980156
TCGA-EE-A29S	0.138247	0.861753	0.010989	0.952261	0.402952
TCGA-EE-A29X	0	1	0.10989	0.792439	0.756154
TCGA-EE-A2A0	0	1	0.164835	0.716648	0.849431
TCGA-EE-A2A1	0.150638	0.849362	0	0.966181	0.361663
TCGA-EE-A2A5	0	1	0.296703	0.428551	1.13614
TCGA-EE-A2A6	0.694528	0.305472	0	0.996166	0.264509
TCGA-EE-A2GC	0.417587	0.582413	0	0.969886	0.237413
TCGA-EE-A2GD	0	1	0.296703	0.42019	1.14339
TCGA-EE-A2GE	0.467527	0.532473	0	0.992932	0.152558
TCGA-EE-A2GH	0.612984	0.387016	0	0.995024	0.213775
TCGA-EE-A2GI	0.532565	0.467435	0	0.973808	0.240624
TCGA-EE-A2GJ	0	1	0.010989	0.943572	0.522616
TCGA-EE-A2GK	1	0	0.296703	0.425609	0.934507
TCGA-EE-A2GL	0.898845	0.101155	0.043956	0.855014	0.572307
TCGA-EE-A2GM	0.384323	0.615677	0	0.996043	0.133123
TCGA-EE-A2GN	0	1	0.406593	0.299718	1.24314
TCGA-EE-A2GO	0	1	0.604396	0.00227391	1.46053
TCGA-EE-A2GR	0	1	0.395604	0.342334	1.20879
TCGA-EE-A2GS	0.246241	0.753759	0.043956	0.860769	0.51928
TCGA-EE-A2GT	0	1	0.131868	0.779123	0.773357
TCGA-EE-A2GU	0.587091	0.412909	0	0.994833	0.198483
TCGA-EE-A2M5	0.546756	0.453244	0	0.999388	0.156565
TCGA-EE-A2M6	0	1	0.230769	0.648922	0.924857
TCGA-EE-A2M7	0.995734	0.00426591	0.274725	0.504774	0.883292
TCGA-EE-A2MC	0.425333	0.574667	0	0.967336	0.24504
TCGA-EE-A2MD	0	1	0.043956	0.85906	0.663418
TCGA-EE-A2ME	0.609563	0.390437	0.043956	0.85315	0.484875
TCGA-EE-A2MF	0.212002	0.787998	0.043956	0.856774	0.54098
TCGA-EE-A2MG	0.68977	0.31023	0.186813	0.694986	0.67426
TCGA-EE-A2MI	0	1	0.043956	0.851077	0.675202
TCGA-EE-A2ML	0.600585	0.399415	0	0.96539	0.287083
TCGA-EE-A2MM	0	1	0.186813	0.69052	0.879296
TCGA-EE-A2MN	0.299852	0.700148	0	0.979473	0.234858
TCGA-EE-A2MP	0.39096	0.60904	0	0.990157	0.16265
TCGA-EE-A2MR	0.564407	0.435593	0.0879121	0.815509	0.530501
TCGA-EE-A2MS	0.423812	0.576188	0	0.985437	0.181177
TCGA-EE-A2MT	0.367693	0.632307	0.032967	0.89613	0.41809
TCGA-EE-A2MU	0.160311	0.839689	0	0.985773	0.301743
TCGA-EE-A3AE	0.470518	0.529482	0	0.992374	0.155927
TCGA-EE-A3AH	0	1	0.527473	0.149658	1.35717
TCGA-EE-A3J3	0	1	0.10989	0.791107	0.757892
TCGA-EE-A3J4	0	1	0.10989	0.793949	0.754177
TCGA-EE-A3J7	0.442086	0.557914	0	0.999111	0.112791
TCGA-EE-A3JA	0.227734	0.772266	0.0659341	0.837828	0.563306
TCGA-EE-A3JH	0.45463	0.54537	0	0.991156	0.15838
TCGA-EE-A3JI	0	1	0.186813	0.687587	0.882585
TCGA-ER-A193	0.470037	0.529963	0	0.973786	0.2268
TCGA-ER-A196	0	1	0.989011	-0.5437	1.79218
TCGA-ER-A19C	0	1	0.318681	0.392912	1.16672
TCGA-ER-A19D	0	1	0.0879121	0.822163	0.716262
TCGA-ER-A19E	0	1	0.241758	0.598038	0.977705
TCGA-ER-A19K	0	1	0	0.958618	0.493351
TCGA-ER-A19M	0.464505	0.535495	0.010989	0.934867	0.328954
TCGA-ER-A2NC	0	1	0.296703	0.432838	1.13241
TCGA-ER-A42L	0.447772	0.552228	0	0.981048	0.199371
TCGA-FR-A2OS	0	1	0.56044	0.0682485	1.4152
TCGA-FR-A3R1	0.299059	0.700941	0	0.992771	0.183355
TCGA-FR-A3YN	0.630051	0.369949	0.021978	0.910502	0.403135
TCGA-FR-A44A	0.615887	0.384113	0	0.998983	0.202966
TCGA-FR-A726	0	1	0.263736	0.521792	1.05194
TCGA-FR-A729	0.639881	0.360119	0.010989	0.924233	0.383002
TCGA-FR-A7UA	0.739859	0.260141	0	0.992473	0.303186
TCGA-FR-A8YC	0.469052	0.530948	0.010989	0.938656	0.320544
TCGA-FR-A8YD	0	1	0.032967	0.89572	0.606368
TCGA-FR-A8YE	0	1	0.593407	0.0147049	1.4521
TCGA-FS-A1YW	0	1	0.241758	0.626767	0.948229
TCGA-FS-A1YX	0	1	0.252747	0.56296	1.01253
TCGA-FS-A1YY	0	1	0.32967	0.373274	1.18323
TCGA-FS-A1Z0	0.514384	0.485616	0	0.999458	0.137799
TCGA-FS-A1Z4	0.215277	0.784723	0.164835	0.727685	0.71663
TCGA-FS-A1ZB	0	1	0.318681	0.392674	1.16692
TCGA-FS-A1ZC	0	1	0.296703	0.457305	1.11085
TCGA-FS-A1ZD	0.561606	0.438394	0.0549451	0.840553	0.496694
TCGA-FS-A1ZE	0	1	0.21978	0.658352	0.914728
TCGA-FS-A1ZF	0	1	0.043956	0.870423	0.646274
TCGA-FS-A1ZJ	0.445343	0.554657	0	0.969071	0.239699
TCGA-FS-A1ZK	0	1	0.318681	0.404686	1.15671
TCGA-FS-A1ZP	0	1	0.175824	0.704064	0.863943
TCGA-FS-A1ZQ	0	1	0.153846	0.763685	0.792834
TCGA-FS-A1ZR	0.274394	0.725606	0	0.97629	0.257708
TCGA-FS-A1ZS	0	1	0.285714	0.4885	1.08275
TCGA-FS-A1ZU	0	1	0.494505	0.205705	1.31574
TCGA-FS-A1ZY	0	1	0.593407	0.0258157	1.44452
TCGA-FS-A1ZZ	0	1	0.241758	0.584595	0.991197
TCGA-FS-A4F0	0	1	0.241758	0.639888	0.934458
TCGA-FS-A4F2	0	1	0.505495	0.190273	1.32727
TCGA-FS-A4F4	0.172508	0.827492	0	0.975665	0.321708
TCGA-FS-A4F5	0	1	0.450549	0.259283	1.27487
TCGA-FS-A4F8	0.911462	0.0885376	0.164835	0.731755	0.691269
TCGA-FS-A4FC	0	1	0	0.963809	0.482844
TCGA-GF-A2C7	0	1	0.296703	0.478502	1.09184
TCGA-GF-A6C8	0.0992329	0.900767	0.241758	0.636622	0.87815
TCGA-GF-A769	0	1	0.252747	0.57708	0.998659
TCGA-GN-A268	0	1	0.186813	0.70233	0.865924
TCGA-GN-A26D	0	1	0.21978	0.658474	0.914595
TCGA-GN-A4U4	1	0	0.945055	-0.3718	1.33774
TCGA-GN-A4U5	0.571707	0.428293	0	0.999746	0.17074
TCGA-GN-A8LK	0.338701	0.661299	0.252747	0.578857	0.827959
TCGA-GN-A8LL	0.637374	0.362626	0.230769	0.644118	0.718247
TCGA-GN-A8LN	0	1	0.252747	0.549938	1.02516
TCGA-GN-A9SD	1	0	0.318681	0.409083	0.944613
TCGA-IH-A3EA	0	1	0.241758	0.581452	0.994324
TCGA-W3-A824	0.626047	0.373953	0.010989	0.955026	0.320101
TCGA-W3-A825	0.542051	0.457949	0	0.969257	0.256368
TCGA-W3-A828	0	1	0.758242	-0.1799	1.57896
TCGA-W3-AA1R	0.442563	0.557437	0	0.97509	0.220149
TCGA-W3-AA1V	0	1	0.241758	0.586145	0.989651
TCGA-W3-AA1W	0.759861	0.240139	0	0.993613	0.314208
TCGA-W3-AA21	0.474001	0.525999	0.043956	0.862281	0.46283
TCGA-WE-A8K4	0.695696	0.304304	0	0.978122	0.305715
TCGA-WE-A8ZN	0.572609	0.427391	0.032967	0.888582	0.426349
TCGA-WE-A8ZQ	0	1	0.538462	0.122283	1.37696
TCGA-WE-A8ZY	0	1	0.10989	0.790837	0.758243
TCGA-WE-AAA0	0	1	0.593407	0.0324805	1.43995
TCGA-XV-A9VZ	0	1	0.340659	0.367641	1.18793
TCGA-XV-A9W2	0	1	0.043956	0.853595	0.671507
TCGA-XV-A9W5	0.252673	0.747327	0.021978	0.911014	0.427
TCGA-XV-AAZV	0	1	0.164835	0.757575	0.800412
TCGA-XV-AAZW	0	1	0.417582	0.280281	1.25849
TCGA-XV-AB01	0.0681214	0.931879	0.10989	0.804276	0.696687
TCGA-YD-A89C	0	1	0.274725	0.497531	1.07448
TCGA-YG-AA3N	0.731439	0.268561	0	0.973579	0.33511
TCGA-YG-AA3P	0	1	0.032967	0.899071	0.600884
TCGA-Z2-A8RT	0.193653	0.806347	0	0.974343	0.311048
TCGA-Z2-AA3S	0.595668	0.404332	0.010989	0.935677	0.348543
TCGA-Z2-AA3V	0	1	0.296703	0.426029	1.13833
