# Supplementary material for: Functional heterogeneity of lymphocytic patterns in primary melanoma dissected through single-cell multiplexing
Source: eLife. 2020 Feb 14;9:e53008. doi: 10.7554/eLife.53008 (PMC7053517; doi:10.7554/eLife.53008)
Supplement: Supplementary file 5. [file elife-53008-supp5.xlsx]

## Sheet: Sheet1
Analysis	test chosen	Multiple testing correction	Justification
Core activation status	one-tailed t-test with FDR correction	Yes	The activation score follows a normal distribution and we are interested on the sign of the difference.
Patient activation status	one-tailed t-test with FDR correction	Yes	The activation score follows a normal distribution and we are interested on the sign of the difference.
Correlation with survival	log-rank test.	No	Standard.
Correlation with histopathological parameters	Categorical variables: pairwise t-test with holm correction.	Yes	A t-test will tell you if two groups have the same means while an ANOVA will tell you if the variances of two or more groups are the same. ANOVA returns a single number (the f-statistic) and one p-value to decide whether to accept or reject the null hypothesis. Pairwise t-tests, on the other hand, will return a p-value for each pairwise comparison (one p-value for each pair of groups). If the num…
	Continuous variables: linear models.	No	Similarly, a t-test will detect if the level of activation is different between two groups while a logistic regression estimates how the group rate varies by activation level. In general, a logistic regression is more flexible and capable of supplying more detailed information than the t-test is. In this case however, is less powerful than the t-test for the basic purpose of detecting a differenc…
			In fact, if we fit a logistic regression in the case of “late regression” vs “early regression”, it returns a p-value of 0.329. This indicates that there is a great separation in activation level between “late regression” and “early regression” but it is not complete: the case where all the “early regression” patients have a specific activation values and all the “late regression” patients anothe…
Cellular composition of the cells based on activation status	Kruskal-Wallis rank sum test	No	The composition is represented by the percentage of cells of a specific type in a core which cannot be assumed to follow a normal distribution. Moreover, the number of groups is 3 (Active, Transition, Exhausted). In this case, we did not adjust for multiple comparisons due to the exploratory nature of the analysis and because the number of comparisons was larger than the number of samples include…
Cellular composition of the cells based on brisk status	Mann-Whitney test	No	The composition is represented by the percentage of cells of a specific type in a core which cannot be assumed to follow a normal distribution. Moreover, the number of groups is 2 (Brisk, NonBrisk). In this case, we did not adjust for multiple comparisons due to the exploratory nature of the analysis and because the number of comparisons was larger than the number of samples included in the analy…
