# Supplementary material for: Functional heterogeneity of lymphocytic patterns in primary melanoma dissected through single-cell multiplexing
Source: eLife. 2020 Feb 14;9:e53008. doi: 10.7554/eLife.53008 (PMC7053517; doi:10.7554/eLife.53008)
Supplement: Supplementary file 6. [file elife-53008-supp6.xlsx]

## Sheet: Patient_metadata
Patient	Core Number	Activation	Activation Status Core	Activation Status Patient	Histotype	Breslow Thickness	Ulceration	Number Of Mitoses/mm2	Lymphocytes Count	Brisk Status Patient	Brisk Status Core	Regression	Regression Type	Sample date	Gender	Survival Status (1=dead, 0=alive)	Overall Survival (months)	Age (years)	T	N	M	Tumor Stage	Therapy	Tumor Location	Comments
1	1	0.1117	Active	Active	ssmm	0.22	0	0	222	NA	NA	REGRESSION	LATE REGRESSION	2005-03-22	V	0	173.307	58.8337	1A	0	0	IA	Surgery	Thorax right
1	3	0.1188	Active	Active	ssmm	0.22	0	0	1098	BRISK	BRISK	REGRESSION	EARLY REGRESSION	2005-03-22	V	0	173.307	58.8337	1A	0	0	IA	Surgery	Thorax right
2	5	0.0964	Active	Active	ssmm	0.71	0	1=6	87	NONBRISK	NON BRISK IN NON BRISK	NA	NA	2005-03-31	M	0	104.865	77.9083	1A	0	0	IA	Surgery	NA
2	8	0.1353	Active	Active	ssmm	0.71	0	1=6	138	NA	NA	REGRESSION	LATE REGRESSION	2005-03-31	M	0	104.865	77.9083	1A	0	0	IA	Surgery	NA
3	9	-0.0132	Transition	Transition	ssmm	2.5	0	1=6	343	NONBRISK	NON BRISK IN NON BRISK	NO REGRESSION	NO REGRESSION	2005-05-20	M	0	167.85	70.8528	3A	0	0	IIA	Surgery	Shoulder left
3	11	0.0394	Transition	Transition	ssmm	2.5	0	1=6	140	NONBRISK	NON BRISK IN NON BRISK	NO REGRESSION	NO REGRESSION	2005-05-20	M	0	167.85	70.8528	3A	0	0	IIA	Surgery	Shoulder left
4	13	-0.0033	Transition	Transition	ssmm	0.26	0	0	959	NONBRISK	NON BRISK IN NON BRISK	NO REGRESSION	NO REGRESSION	2005-06-09	M	0	170.48	65.6208	1A	0	0	IA	Surgery	Lower leg left
4	14	-0.0067	Transition	Transition	ssmm	0.26	0	0	316	NONBRISK	BRISK IN NON BRISK	NO REGRESSION	NO REGRESSION	2005-06-09	M	0	170.48	65.6208	1A	0	0	IA	Surgery	Lower leg left
5	15	-0.0001	Transition	Transition	ssmm	1.73	0	>6	413	NONBRISK	BRISK IN NON BRISK	NO REGRESSION	NO REGRESSION	2005-08-03	M	1	38.6588	64.2053	2A	0	0	IB	Chemotherapy (Cisplatinum-DTIC) -> Phase 1 trial (BI6727) -> Phase 1 trial PF-03814735)	Back	PD after 6 cycles chemotherapy -> Inclusion phase 1 trial (no ICI available at that time)
5	16	-0.007	Transition	Transition	ssmm	1.73	0	>6	497	NONBRISK	NON BRISK IN NON BRISK	NO REGRESSION	NO REGRESSION	2005-08-03	M	1	38.6588	64.2053	2A	0	0	IB	Chemotherapy (Cisplatinum-DTIC) -> Phase 1 trial (BI6727) -> Phase 1 trial PF-03814735)	Back	PD after 6 cycles chemotherapy -> Inclusion phase 1 trial (no ICI available at that time)
6	19	-0.2146	Exhausted	Exhausted	ssmm	0.3	0	0	222	NA	NA	REGRESSION	EARLY REGRESSION	2005-11-21	V	0	156.772	45.6975	1A	0	0	IA	Surgery	Back
7	20	-0.0252	Exhausted	Exhausted	ssmm	0.51	0	0	353	NONBRISK	BRISK IN NON BRISK	NO REGRESSION	NO REGRESSION	2006-05-12	M	0	49.5398	78.0123	1A	0	0	IA	Surgery	Back	Received chemotherapy for bladder cancer, NOT for melanoma
7	21	-0.0087	Transition	Exhausted	ssmm	0.51	0	0	274	NONBRISK	BRISK IN NON BRISK	NO REGRESSION	NO REGRESSION	2006-05-12	M	0	49.5398	78.0123	1A	0	0	IA	Surgery	Back	Received chemotherapy for bladder cancer, NOT for melanoma
8	22	-0.1304	Exhausted	Exhausted	ssmm	0.31	0	1=6	74	NONBRISK	NON BRISK IN NON BRISK	NO REGRESSION	NO REGRESSION	2006-06-02	V	0	149.507	53.3224	1A	0	0	IA	Surgery	Abdomen
9	23	0.0272	Active	Active	ssmm	7.2	0	>6	871	NONBRISK	BRISK IN NON BRISK	NO REGRESSION	NO REGRESSION	2008-02-05	M	0	121.006	40.4682	4A	1	1	IV	Chemotherapy (Cisplatinum-DTIC) -> Ipilimumab	Thorax left	Progressive disease after 2 cycles chemotherapy, switch to ipilimumab
10	24	0.0446	Transition	Active	ssmm	0.42	0	0	12	NA	NA	REGRESSION	LATE REGRESSION	2008-09-02	V	0	57.0677	63.9726	1A	0	0	IA	Surgery	Face
10	25	0.0313	Active	Active	ssmm	0.42	0	0	787	BRISK	BRISK	NA	NA	2008-09-02	V	0	57.0677	63.9726	1A	0	0	IA	Surgery	Face
12	27	0.2069	Active	Active	lmm	0.42	0	0	109	NA	NA	REGRESSION	LATE REGRESSION	2007-01-22	V	0	40.9928	80.0602	1A	0	0	IA	Surgery	Lower leg left
12	28	0.2578	Active	Active	lmm	0.42	0	0	NA	NA	NA	NA	NA	2007-01-22	V	0	40.9928	80.0602	1A	0	0	IA	Surgery	Lower leg left
14	32	0.0807	Active	Active	ssmm	0.75	0	0	462	NONBRISK	BRISK IN NON BRISK	REGRESSION	EARLY REGRESSION	2007-03-27	M	0	0	76.0493	1A	0	0	IA	Surgery	Thorax right
14	33	0.1038	Active	Active	ssmm	0.75	0	0	476	NONBRISK	BRISK IN NON BRISK	NA	NA	2007-03-27	M	0	0	76.0493	1A	0	0	IA	Surgery	Thorax right
14	34	0.1289	Active	Active	ssmm	0.75	0	0	121	NONBRISK	NON BRISK IN NON BRISK	NA	NA	2007-03-27	M	0	0	76.0493	1A	0	0	IA	Surgery	Thorax right
15	35	-0.2252	Exhausted	Exhausted	ssmm	0.35	0	0	128	NONBRISK	NON BRISK IN NON BRISK	NO REGRESSION	NO REGRESSION	2007-05-23	M	0	4.20776	85.2895	1A	0	0	IA	Surgery	Face
16	36	0.0365	Transition	Transition	ssmm	0.28	0	0	155	NONBRISK	NON BRISK IN NON BRISK	NO REGRESSION	NO REGRESSION	2007-06-05	M	0	146.811	37.5168	IA	0	0	IA	Surgery	Thorax left
17	37	0.0674	Transition	Active	ssmm	0.36	0	0	67	NONBRISK	NON BRISK IN NON BRISK	NO REGRESSION	NO REGRESSION	2007-06-29	M	0	137.475	59.8439	1A	0	0	IA	Surgery	Upper leg right
17	39	0.0345	Active	Active	ssmm	0.36	0	0	549	NA	NA	NO REGRESSION	NO REGRESSION	2007-06-29	M	0	137.475	59.8439	1A	0	0	IA	Surgery	Upper leg right
18	40	0.1755	Active	Active	ssmm	0.93	+	0	904	BRISK	BRISK	NO REGRESSION	NO REGRESSION	2008-02-08	V	0	131.197	44.4052	1B	0	0	IA	Surgery	Shoulder right	Metastases after data cut off
19	42	-0.0062	Transition	Transition	lmm	0.37	0	1=6	291	NONBRISK	NON BRISK IN NON BRISK	NO REGRESSION	NO REGRESSION	2009-04-20	V	0	120.579	82.3628	1A	0	0	IA	Surgery	Face
20	43	-0.0594	Exhausted	Exhausted	ssmm	0.67	0	1=6	121	NONBRISK	NON BRISK IN NON BRISK	NO REGRESSION	NO REGRESSION	2008-07-22	M	1	35.7659	62.8884	1A	0	0	IA	Surgery	Back	No systemic therapy once metastasized
20	44	-0.0552	Exhausted	Exhausted	ssmm	0.67	0	1=6	595	NONBRISK	NON BRISK IN NON BRISK	NO REGRESSION	NO REGRESSION	2008-07-22	M	1	35.7659	62.8884	1A	0	0	IA	Surgery	Back	No systemic therapy once metastasized
20	45	-0.0271	Exhausted	Exhausted	ssmm	0.67	0	1=6	278	NONBRISK	BRISK IN NON BRISK	NO REGRESSION	NO REGRESSION	2008-07-22	M	1	35.7659	62.8884	1A	0	0	IA	Surgery	Back	No systemic therapy once metastasized
20	46	-0.0006	Transition	Exhausted	ssmm	0.67	0	1=6	908	NONBRISK	NON BRISK IN NON BRISK	NO REGRESSION	NO REGRESSION	2008-07-22	M	1	35.7659	62.8884	1A	0	0	IA	Surgery	Back	No systemic therapy once metastasized
20	47	-0.0249	Exhausted	Exhausted	ssmm	0.67	0	1=6	441	NONBRISK	BRISK IN NON BRISK	NO REGRESSION	NO REGRESSION	2008-07-22	M	1	35.7659	62.8884	1A	0	0	IA	Surgery	Back	No systemic therapy once metastasized
21	48	-0.1332	Exhausted	Exhausted	ssmm	0.5	0	0	347	NONBRISK	NON BRISK IN NON BRISK	NA	NA	2008-03-31	V	0	135.339	42.1684	1A	0	0	IA	Surgery	Lower leg left
21	49	-0.3241	Exhausted	Exhausted	ssmm	0.5	0	0	270	NA	NA	REGRESSION	EARLY REGRESSION	2008-03-31	V	0	135.339	42.1684	1A	0	0	IA	Surgery	Lower leg left
22	50	-0.0279	Exhausted	Exhausted	ssmm	1.13	+	1=6	962	BRISK	BRISK	NO REGRESSION	NO REGRESSION	2008-03-14	M	0	24.2275	55.1595	2B	0	0	IIA	Surgery	Back
23	51	-0.0066	Transition	Transition	ssmm	0.78	0	0	62	NONBRISK	NON BRISK IN NON BRISK	NO REGRESSION	NO REGRESSION	2009-06-22	M	0	1.90664	35.7317	1A	0	0	IA	Surgery	Back
23	52	-0.0174	Transition	Transition	ssmm	0.78	0	0	52	NONBRISK	NON BRISK IN NON BRISK	NO REGRESSION	NO REGRESSION	2009-06-22	M	0	1.90664	35.7317	1A	0	0	IA	Surgery	Back
23	53	-0.0068	Transition	Transition	ssmm	0.78	0	0	140	NONBRISK	NON BRISK IN NON BRISK	NO REGRESSION	NO REGRESSION	2009-06-22	M	0	1.90664	35.7317	1A	0	0	IA	Surgery	Back
24	54	-0.0311	Exhausted	Exhausted	ssmm	1.125	0	1=6	410	NONBRISK	BRISK IN NON BRISK	REGRESSION	EARLY REGRESSION	2009-07-06	V	1	57.6266	64.9665	2A	0	0	IB	Surgery	Lower leg right	Metastases but pt refused therapy
24	55	-0.0271	Exhausted	Exhausted	ssmm	1.125	0	1=6	424	NONBRISK	NON BRISK IN NON BRISK	NA	NA	2009-07-06	V	1	57.6266	64.9665	2A	0	0	IB	Surgery	Lower leg right	Metastases but pt refused therapy
24	56	0.0336	Transition	Exhausted	ssmm	1.125	0	1=6	74	NONBRISK	NON BRISK IN NON BRISK	NA	NA	2009-07-06	V	1	57.6266	64.9665	2A	0	0	IB	Surgery	Lower leg right	Metastases but pt refused therapy
25	57	0.0435	Active	Transition	nmm	2.72	+	>6	155	NONBRISK	NON BRISK IN NON BRISK	NO REGRESSION	NO REGRESSION	2009-10-09	V	0	102.367	83.217	3B	1C	0	IIIC	Surgery	Foot right
25	58	-0.0298	Exhausted	Transition	nmm	2.72	+	>6	160	NONBRISK	NON BRISK IN NON BRISK	NO REGRESSION	NO REGRESSION	2009-10-09	V	0	102.367	83.217	3B	1C	0	IIIC	Surgery	Foot right
26	60	0.145	Active	Active	ssmm	0.66	0	1=6	171	NONBRISK	BRISK IN NON BRISK	NO REGRESSION	NO REGRESSION	2009-11-10	V	0	115.746	69.6619	1A	0	0	IA	Surgery	Left upper arm
26	61	0.0232	Transition	Active	ssmm	0.66	0	1=6	11	NONBRISK	BRISK IN NON BRISK	NO REGRESSION	NO REGRESSION	2009-11-10	V	0	115.746	69.6619	1A	0	0	IA	Surgery	Left upper arm
27	62	0.0161	Transition	Transition	ssmm	0.78	0	0	290	BRISK	BRISK IN NON BRISK	NA	NA	2010-06-07	V	0	108.909	53.3963	2A	0	0	IB	Surgery	Lower leg left
27	74	-0.0636	Exhausted	Transition	ssmm	0.78	0	0	NA	NA	NA	NA	NA	2010-06-07	V	0	108.909	53.3963	2A	0	0	IB	Surgery	Lower leg left
28	64	-0.0927	Exhausted	Exhausted	ssmm	2.72	+	>6	351	BRISK	BRISK	NA	NA	2010-05-26	M	0	11.5385	85.462	3B	NA	NA	NA	NA	NA	No clinical information, only APO primary tumor available
28	65	0.0246	Transition	Exhausted	ssmm	2.72	+	>6	126	NA	NA	REGRESSION	LATE REGRESSION	2010-05-26	M	0	11.5385	85.462	3B	NA	NA	NA	NA	NA	No clinical information, only APO primary tumor available
29	66	0.0164	Transition	Transition	ssmm	0.66	0	0	214	NA	NA	REGRESSION	EARLY REGRESSION	2010-04-22	V	0	41.2558	77.1773	1A	0	0	IA	Surgery	Abdomen
29	67	0.0198	Transition	Transition	ssmm	0.66	0	0	358	NA	NA	REGRESSION	EARLY REGRESSION	2010-04-22	V	0	41.2558	77.1773	1A	0	0	IA	Surgery	Abdomen
30	68	-0.1504	Exhausted	Active	nmm	1.72	0	>6	20	NONBRISK	BRISK IN NON BRISK	NO REGRESSION	NO REGRESSION	2009-12-04	V	0	114.464	65.0185	2A	0	0	IB	Surgery	Back
30	69	-0.081	Transition	Active	nmm	1.72	0	>6	9	NONBRISK	BRISK IN NON BRISK	NO REGRESSION	NO REGRESSION	2009-12-04	V	0	114.464	65.0185	2A	0	0	IB	Surgery	Back
30	70	0.036	Active	Active	nmm	1.72	0	>6	326	NONBRISK	BRISK IN NON BRISK	NO REGRESSION	NO REGRESSION	2009-12-04	V	0	114.464	65.0185	2A	0	0	IB	Surgery	Back
30	71	0.0816	Active	Active	nmm	1.72	0	>6	384	NONBRISK	BRISK IN NON BRISK	NO REGRESSION	NO REGRESSION	2009-12-04	V	0	114.464	65.0185	2A	0	0	IB	Surgery	Back
31	75	0.0005	Transition	Exhausted	ssmm	0.7	0	0	1531	BRISK	BRISK	REGRESSION	EARLY REGRESSION	2010-12-01	M	0	96.3511	59.7837	1A	0	0	IA	Surgery	Lower leg left
31	76	-0.0714	Exhausted	Exhausted	ssmm	0.7	0	0	282	BRISK	BRISK	NA	NA	2010-12-01	M	0	96.3511	59.7837	1A	0	0	IA	Surgery	Lower leg left
31	77	-0.0701	Exhausted	Exhausted	ssmm	0.7	0	0	356	BRISK	BRISK	NA	NA	2010-12-01	M	0	96.3511	59.7837	1A	0	0	IA	Surgery	Lower leg left
31	78	-0.0551	Exhausted	Exhausted	ssmm	0.7	0	0	357	BRISK	BRISK	NA	NA	2010-12-01	M	0	96.3511	59.7837	1A	0	0	IA	Surgery	Lower leg left
